# Supplementary material for: Supramolecular assembly and spectroscopic characterization of indolenine–barbituric acid zwitterions
Source: Royal Society of Chemistry journal article supplement (doi:10.1039/d0nj04357e), 2020-12-15
Supplement: d0nj04357e1.pdf [file d0nj04357e1.pdf]

**Electronic Supplementary Information (ESI)**

**Supramolecular assembly and spectroscopic characterization of indolenine  
- barbituric acid zwitterions**

Abdul Qaiyum Ramle <sup>a\*</sup>, Edward R. T. Tiekink <sup>b\*</sup>, Chee Chin Fei <sup>c</sup>,

Nurhidayatullaili Muhd Julkapli <sup>c</sup>, Wan Jeffrey Basirun <sup>a\*</sup>

<sup>a</sup> Department of Chemistry, University of Malaya, 50603, Kuala Lumpur, Malaysia.

<sup>b</sup> Research Centre for Crystalline Materials, School of Science & Technology, Sunway University, 47500 Bandar Sunway, Selangor Darul Ehsan, Malaysia.

<sup>c</sup> Nanotechnology and Catalysis Research Centre, University of Malaya, 50603, Kuala Lumpur, Malaysia.

\*Corresponding authors:

[qaiyum@um.edu.my](mailto:qaiyum@um.edu.my) (A. Q. Ramle)

[edwardt@sunway.edu.my](mailto:edwardt@sunway.edu.my) (E. R. T. Tiekink)

[jeff@um.edu.my](mailto:jeff@um.edu.my) (W. J. Basirun)

**Table of contents:**

| <b>No</b> | <b>Contents</b>                          | <b>Page</b> |
|-----------|------------------------------------------|-------------|
| 1.        | Synthesis routes of <b>6 – 15</b> .      | S3          |
| 2.        | NMR spectra of all new compounds         | S4 – S46    |
| 3.        | HRMS spectra of selected compounds       | S47 – S48   |
| 4.        | FT-IR spectra of <b>12</b> and <b>22</b> | S49         |
| 5.        | X-ray crystallographic data              | S50 – S51   |
| 6.        | Photophysical parameters of <b>22</b> .  | S52         |
| 7.        | Spectroscopic data of <b>19</b> with TFA | S53 – S54   |

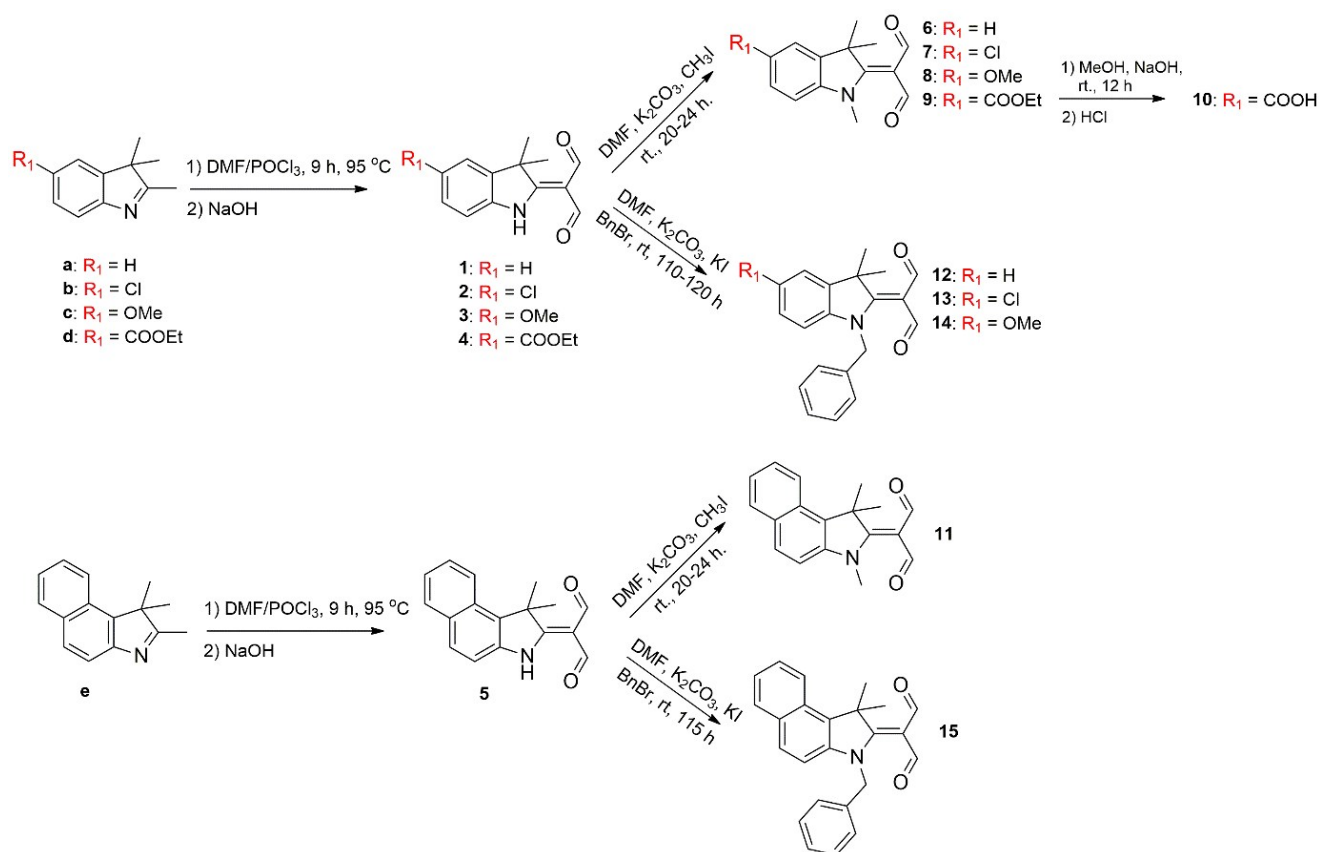

**Scheme S1:** Synthesis routes of **6 – 15**.

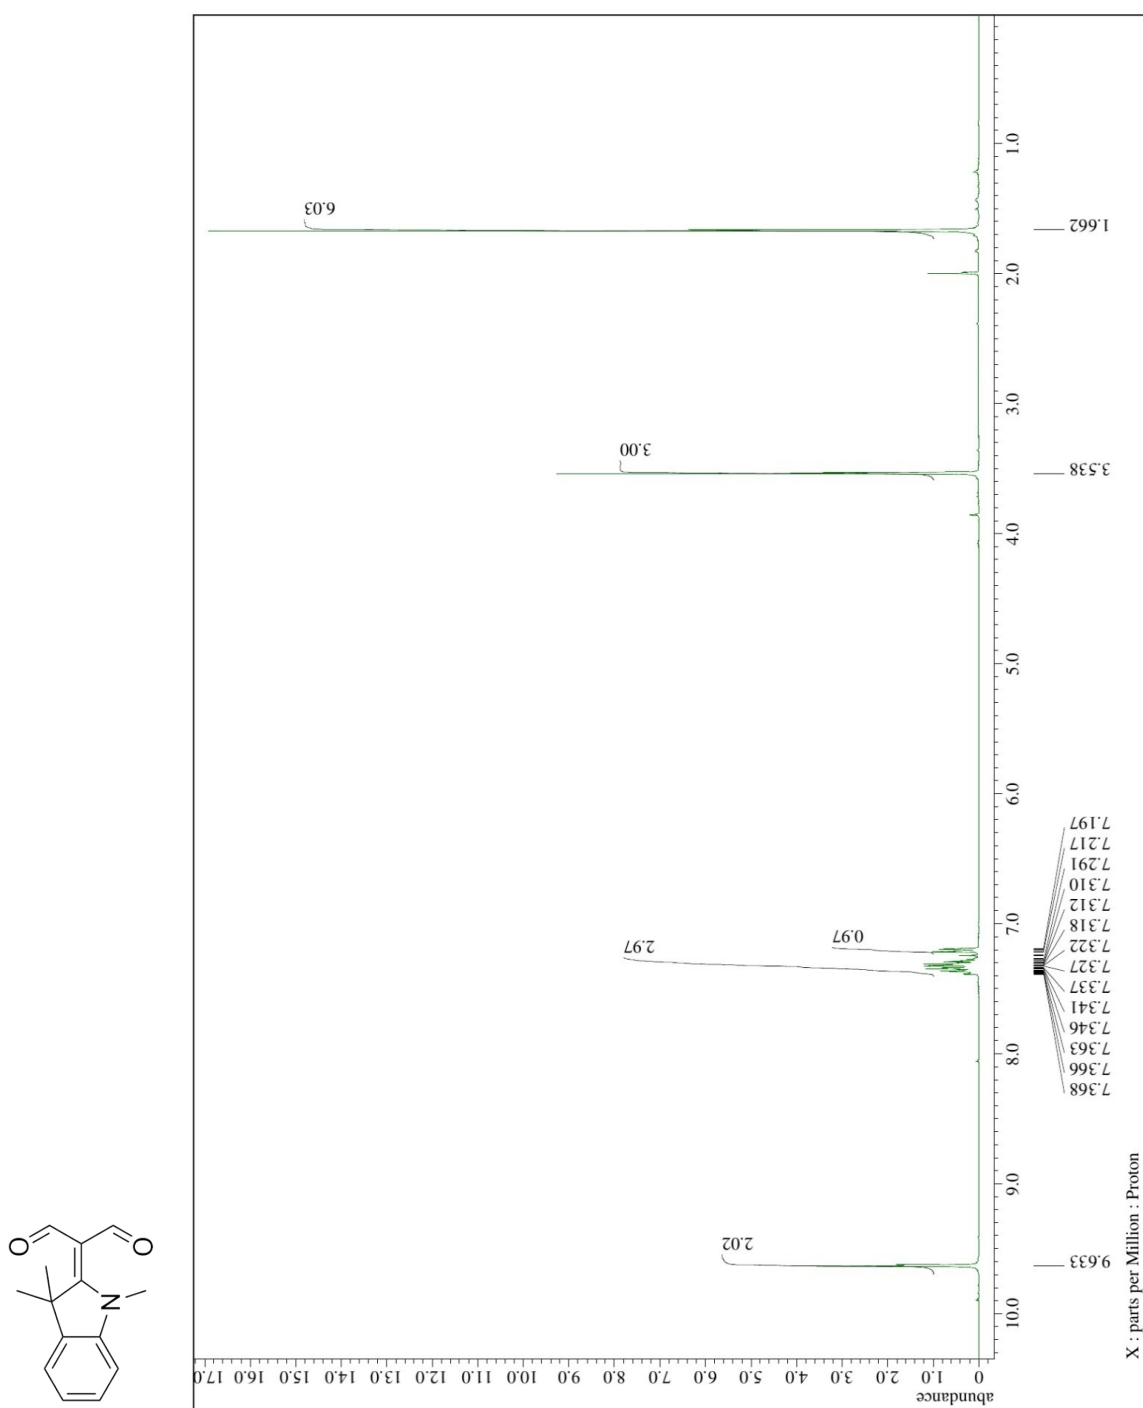

**Fig. S1:** <sup>1</sup>H NMR (400 MHz, CDCl<sub>3</sub>) spectrum of **6**.

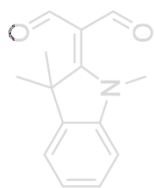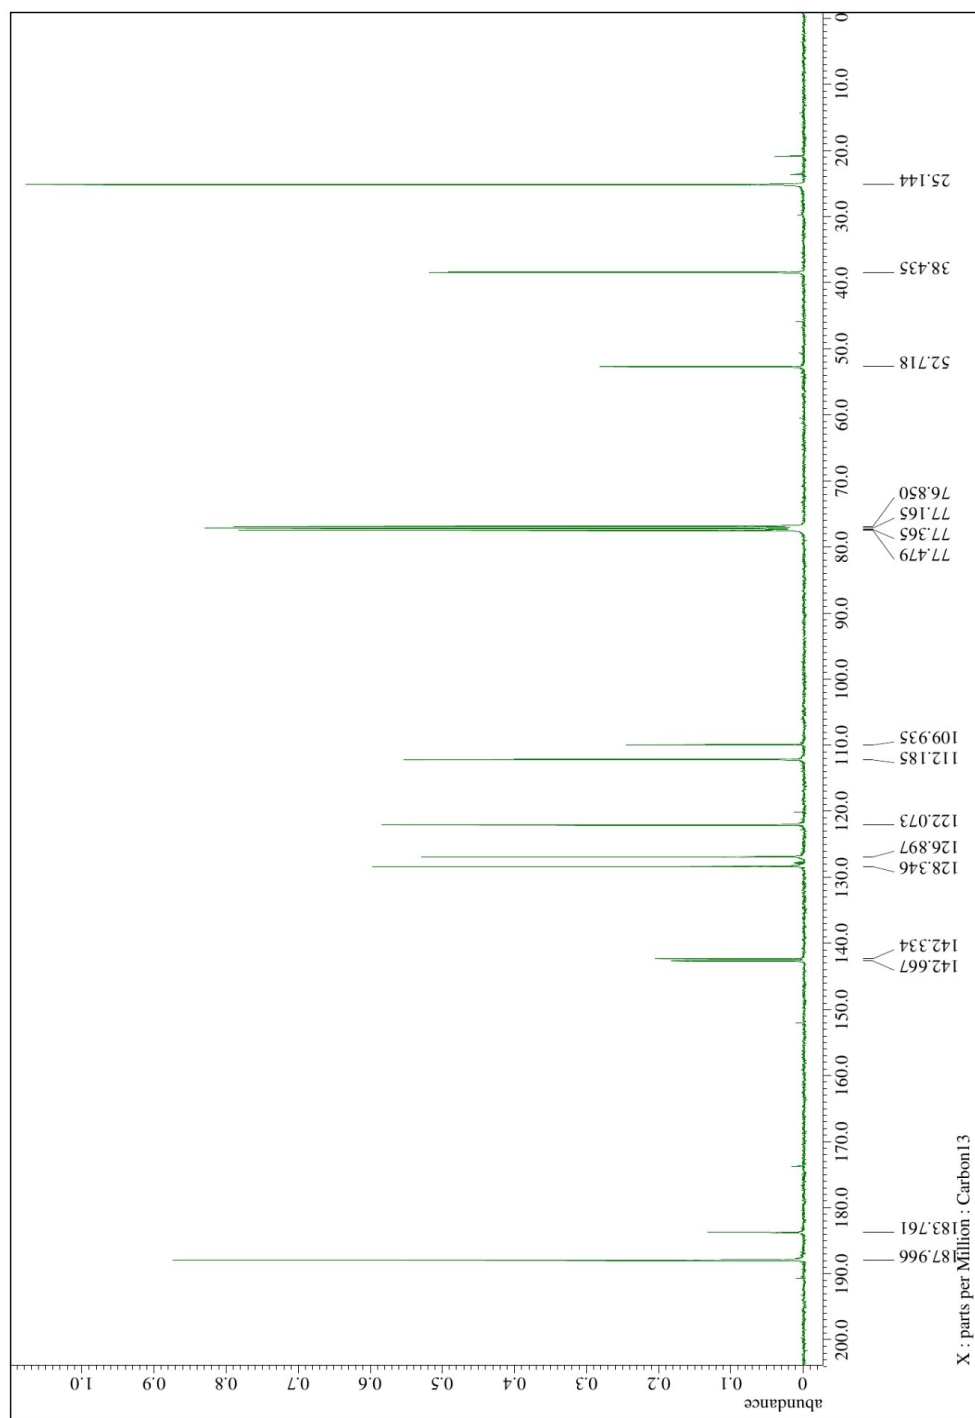

**Fig. S2:**  $^{13}\text{C}$  NMR (100 MHz,  $\text{CDCl}_3$ ) spectrum of 6.

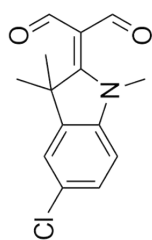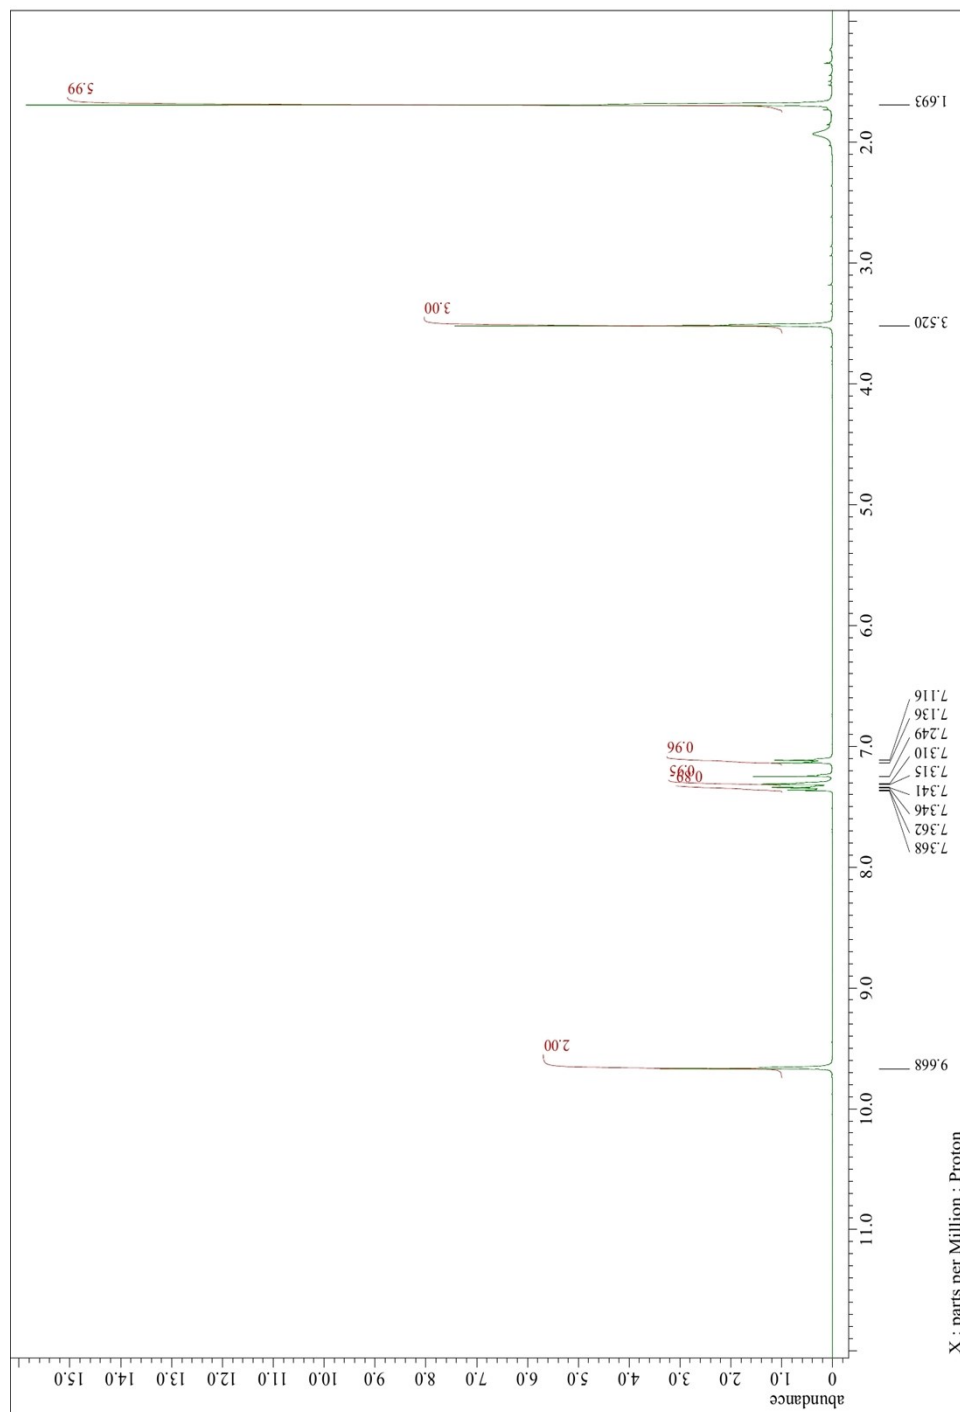

**Fig. S3:**  $^1\text{H}$  NMR (400 MHz,  $\text{CDCl}_3$ ) spectrum of **7**.

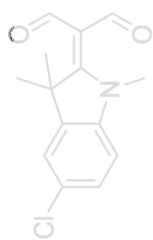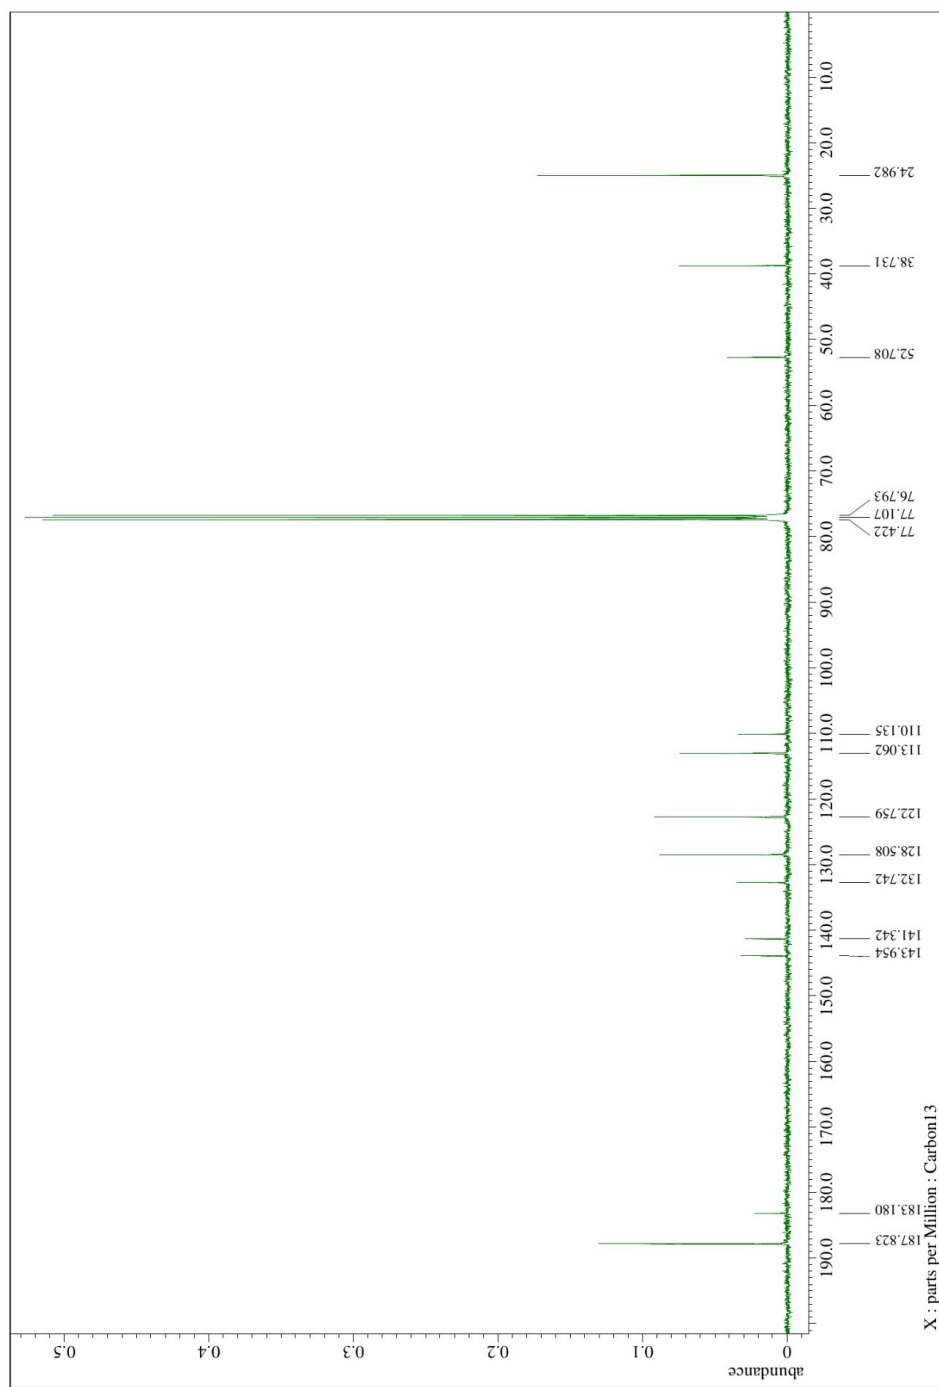

**Fig. S4:**  $^{13}\text{C}$  NMR (100 MHz,  $\text{CDCl}_3$ ) spectrum of **7**.

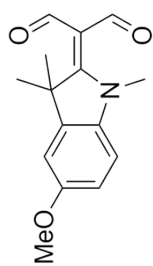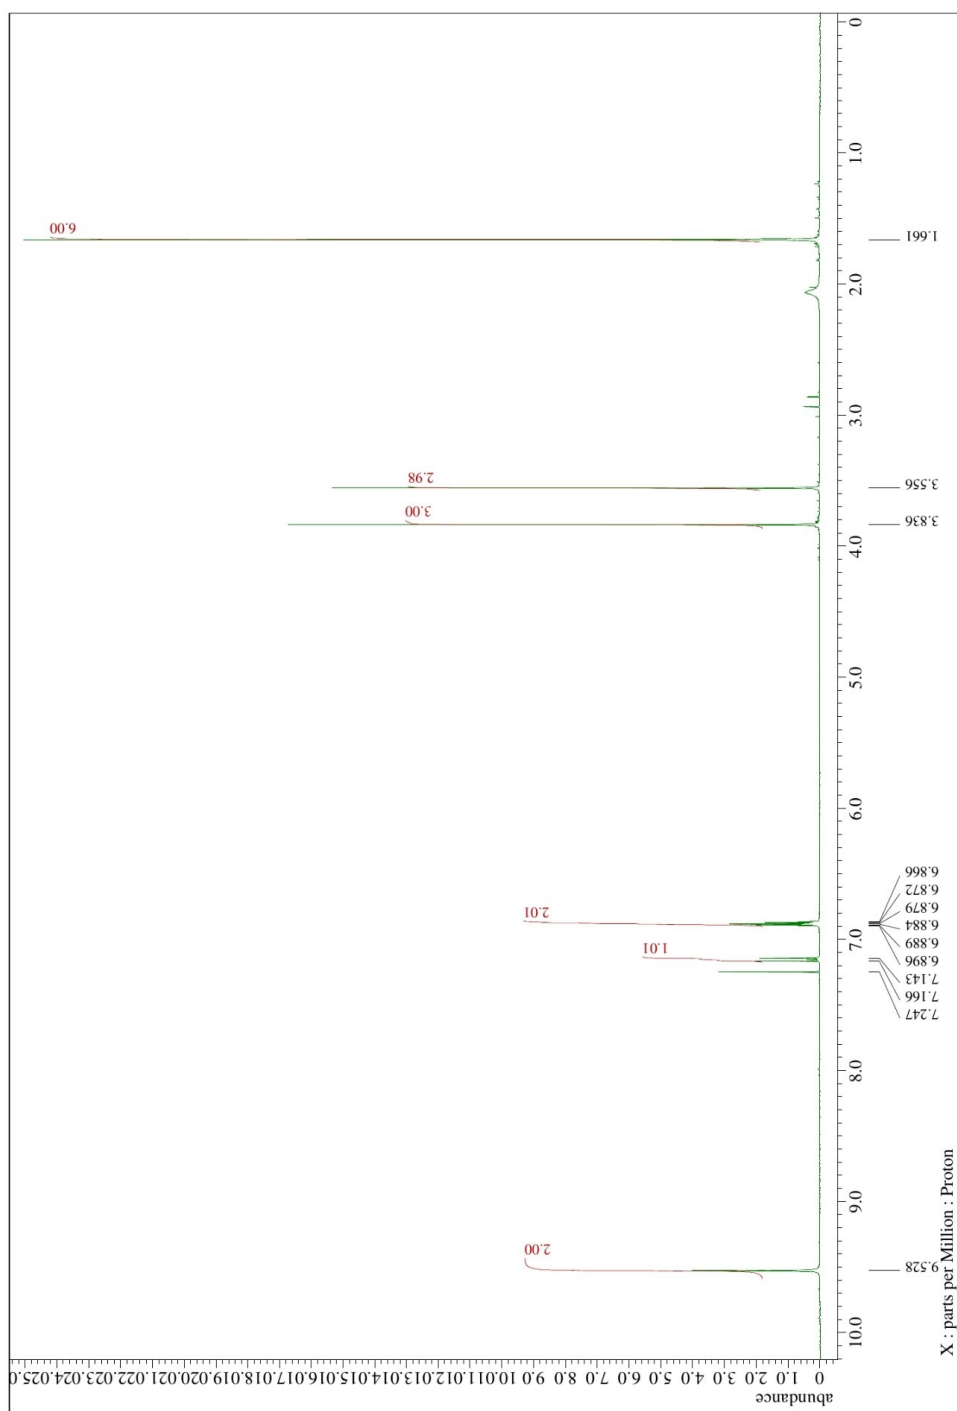

Fig. S5:  $^1\text{H}$  NMR (400 MHz,  $\text{CDCl}_3$ ) spectrum of **8**.



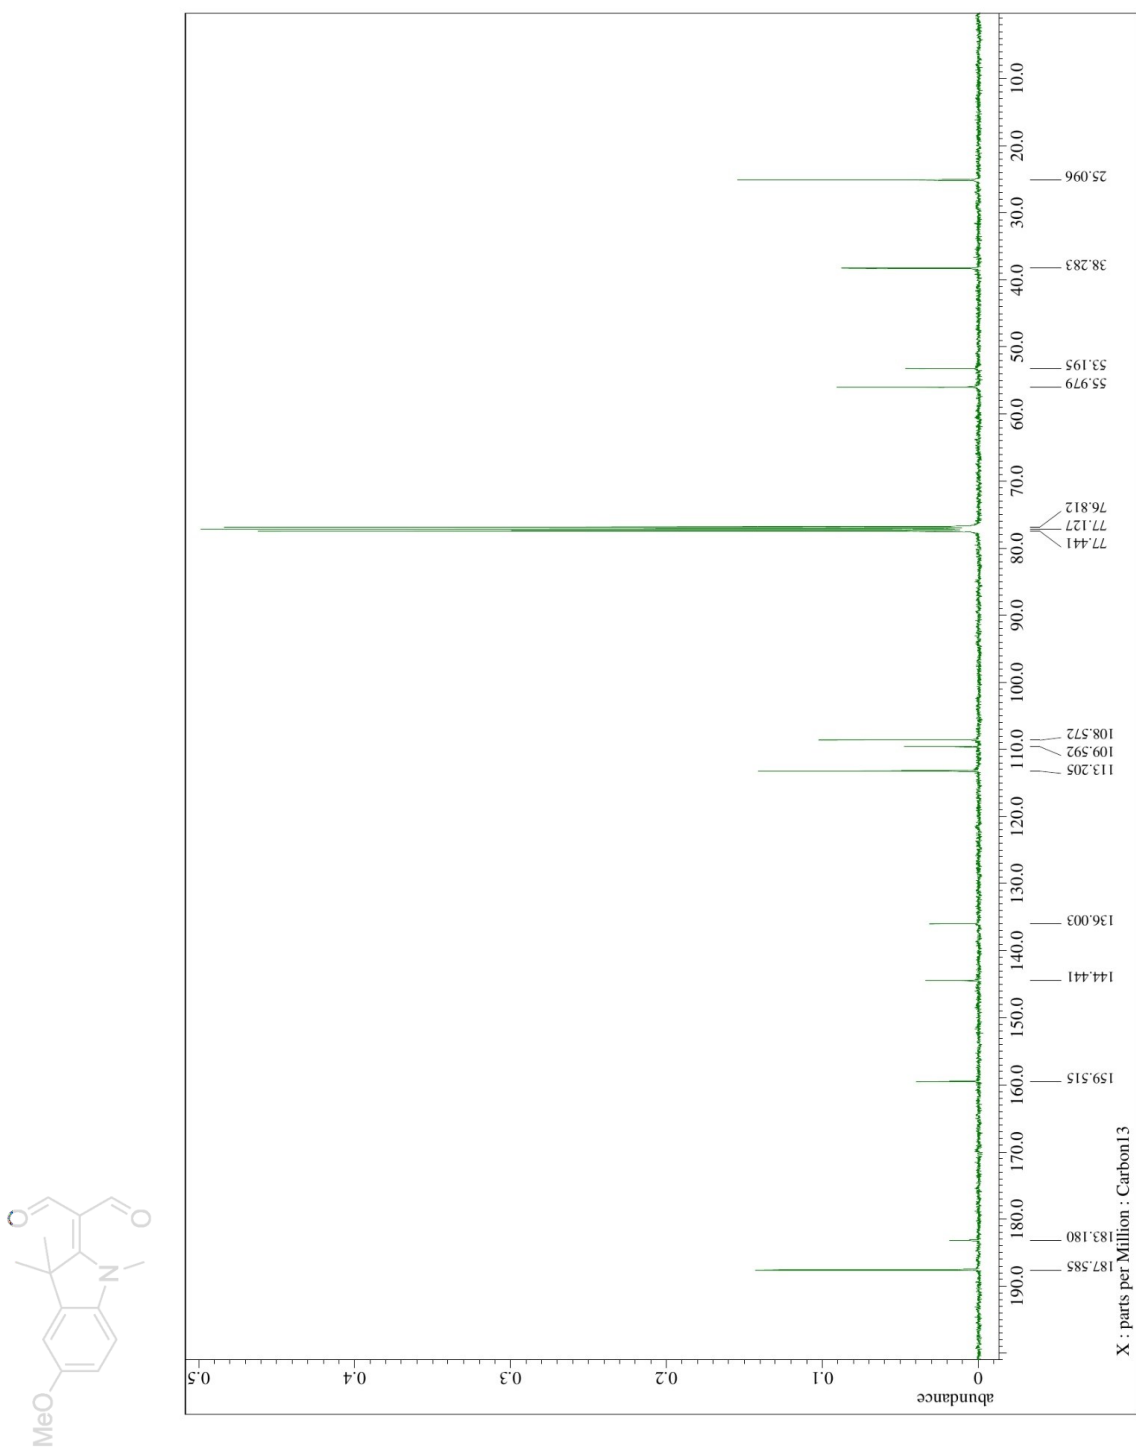

**Fig. S6:**  $^{13}\text{C}$  NMR (100 MHz,  $\text{CDCl}_3$ ) spectrum of **8**.

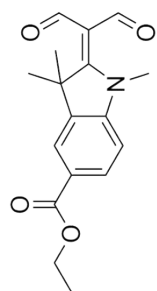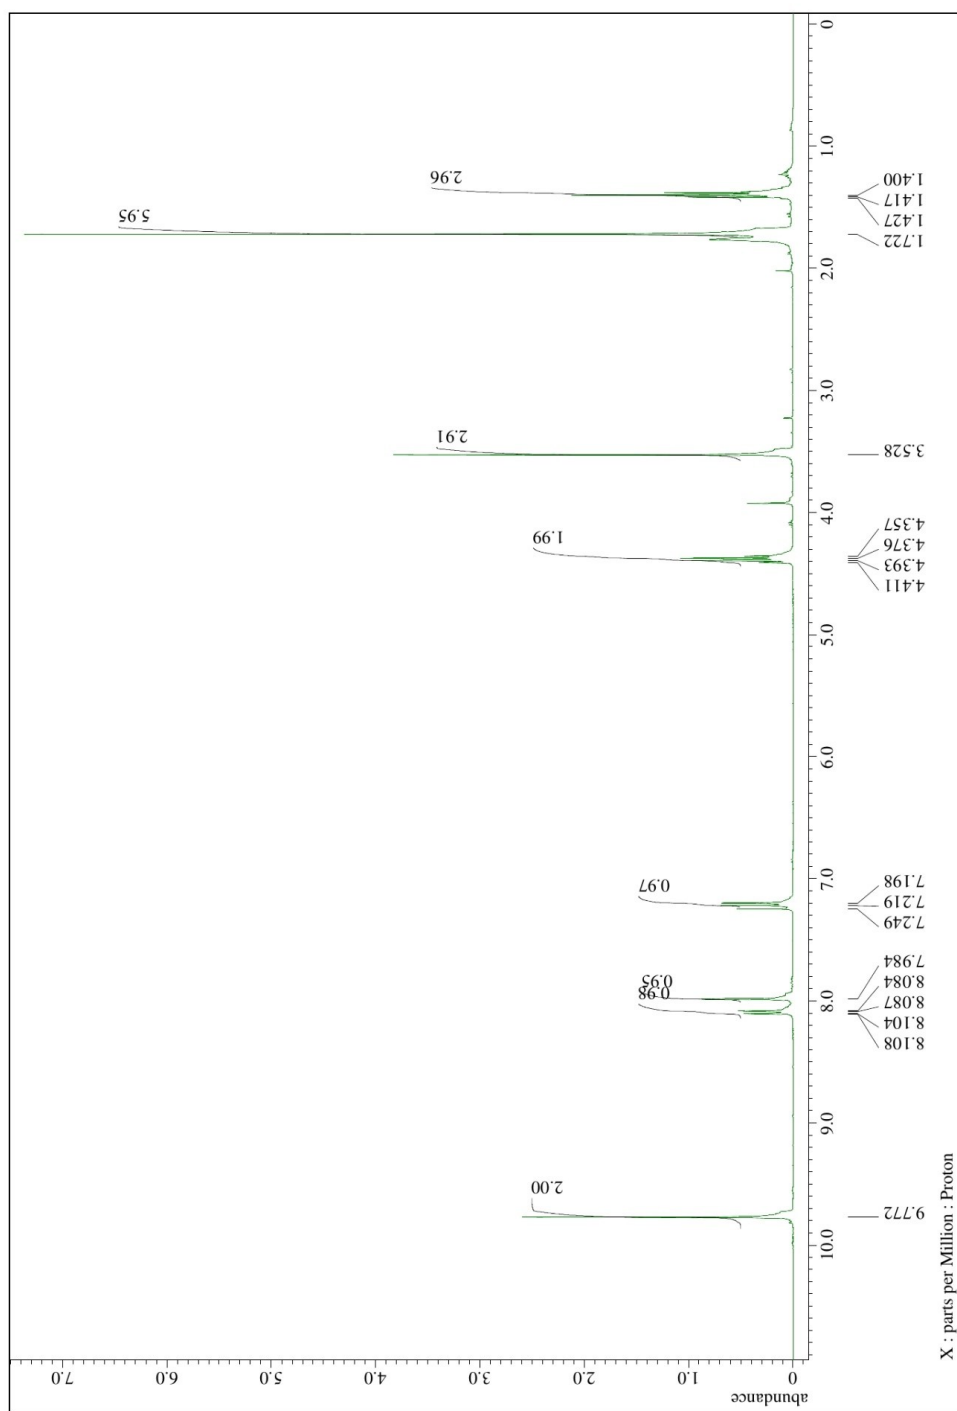

**Fig. S7:**  $^1\text{H}$  NMR (400 MHz,  $\text{CDCl}_3$ ) spectrum of **9**.

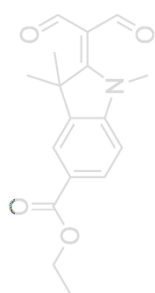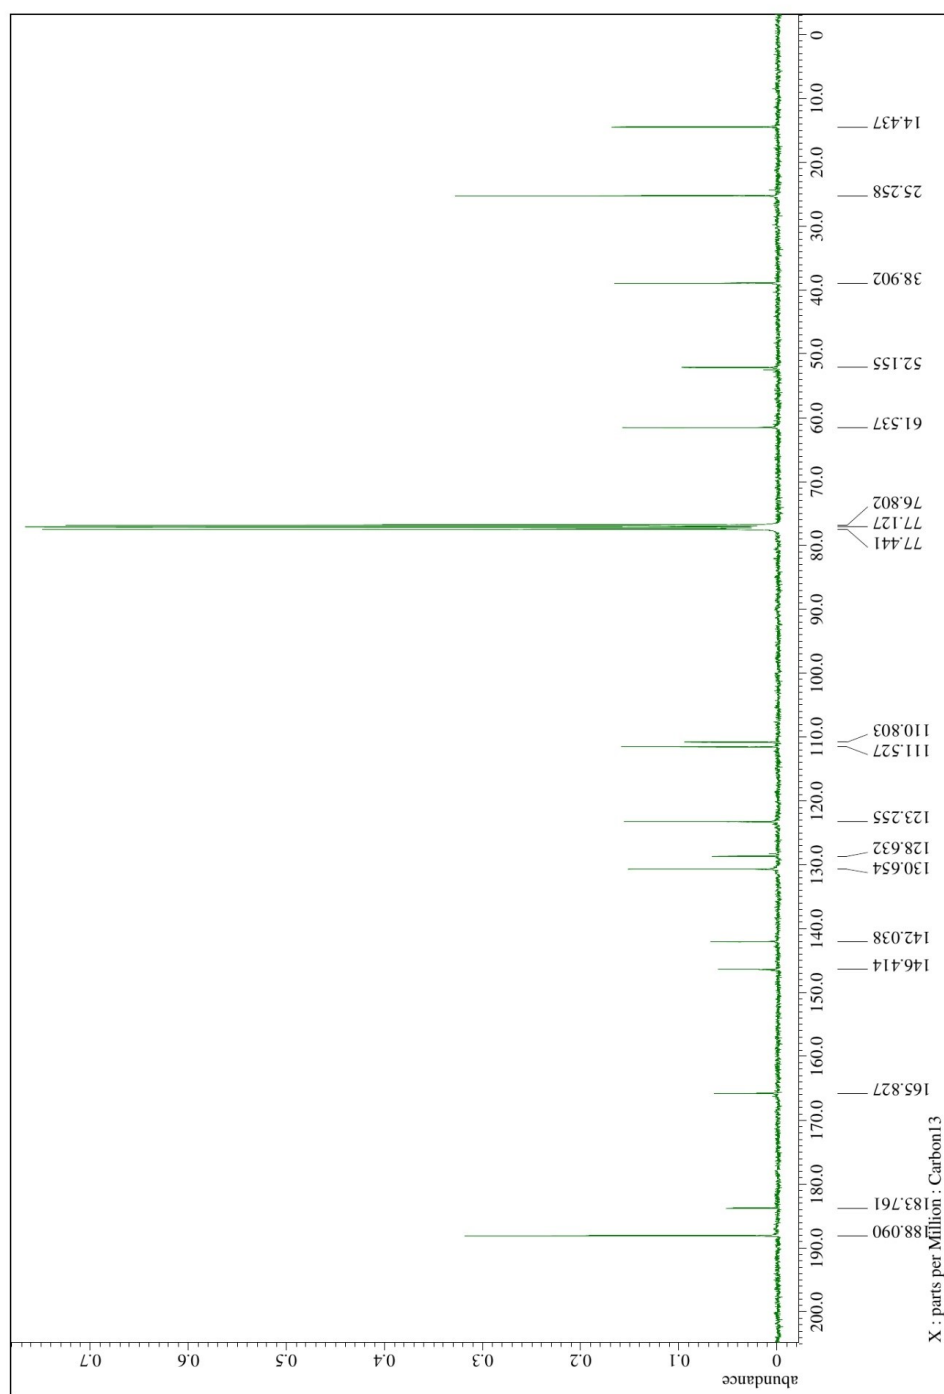

Fig. S8:  $^{13}\text{C}$  NMR (100 MHz,  $\text{CDCl}_3$ ) spectrum of **9**.

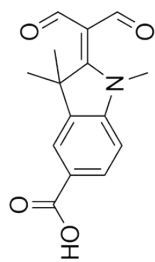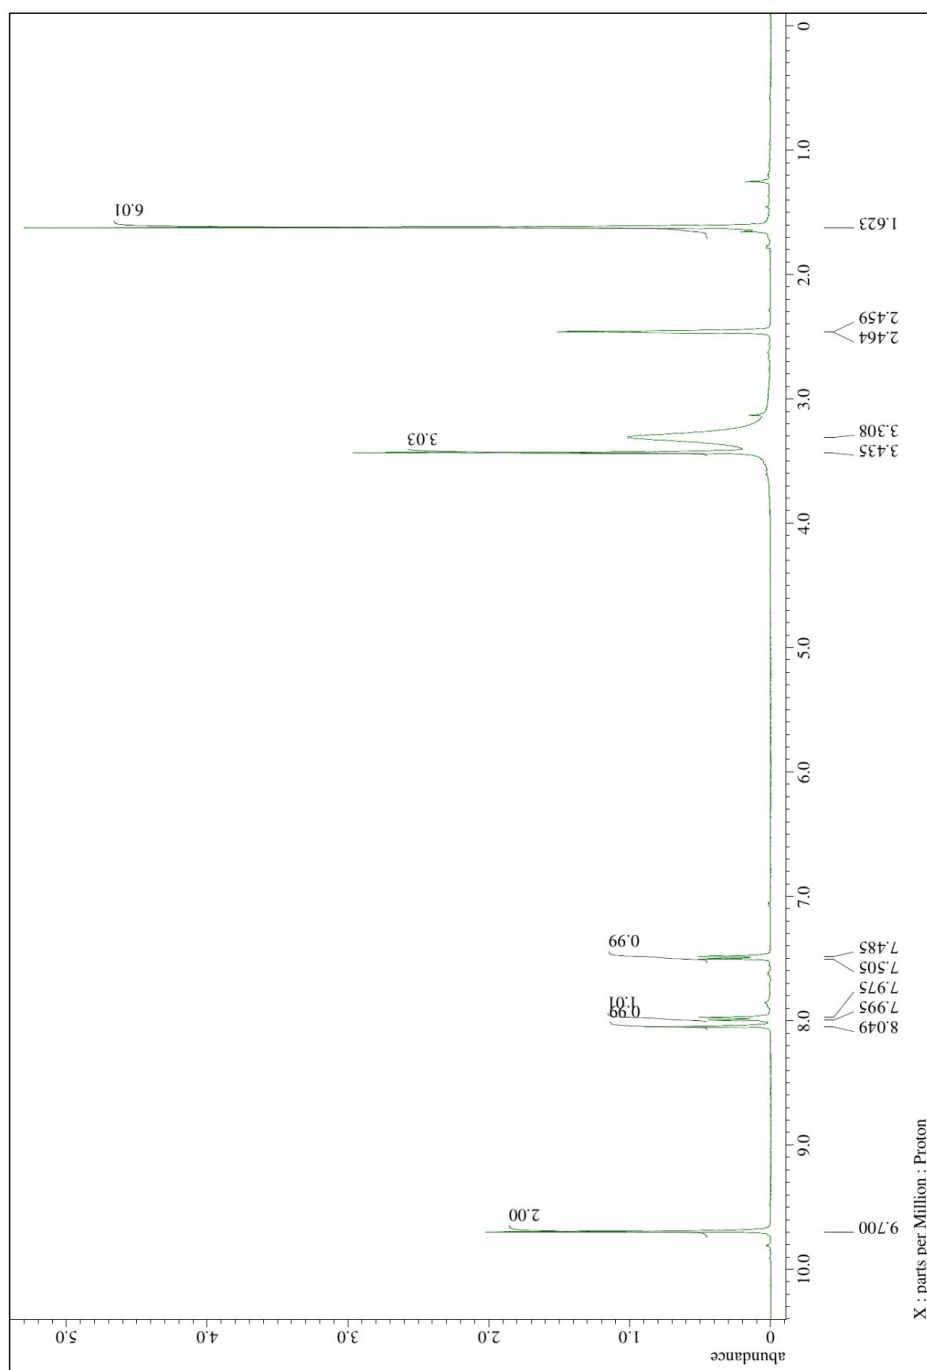

**Fig. S9:**  $^1\text{H}$  NMR (400 MHz, DMSO) spectrum of **10**.

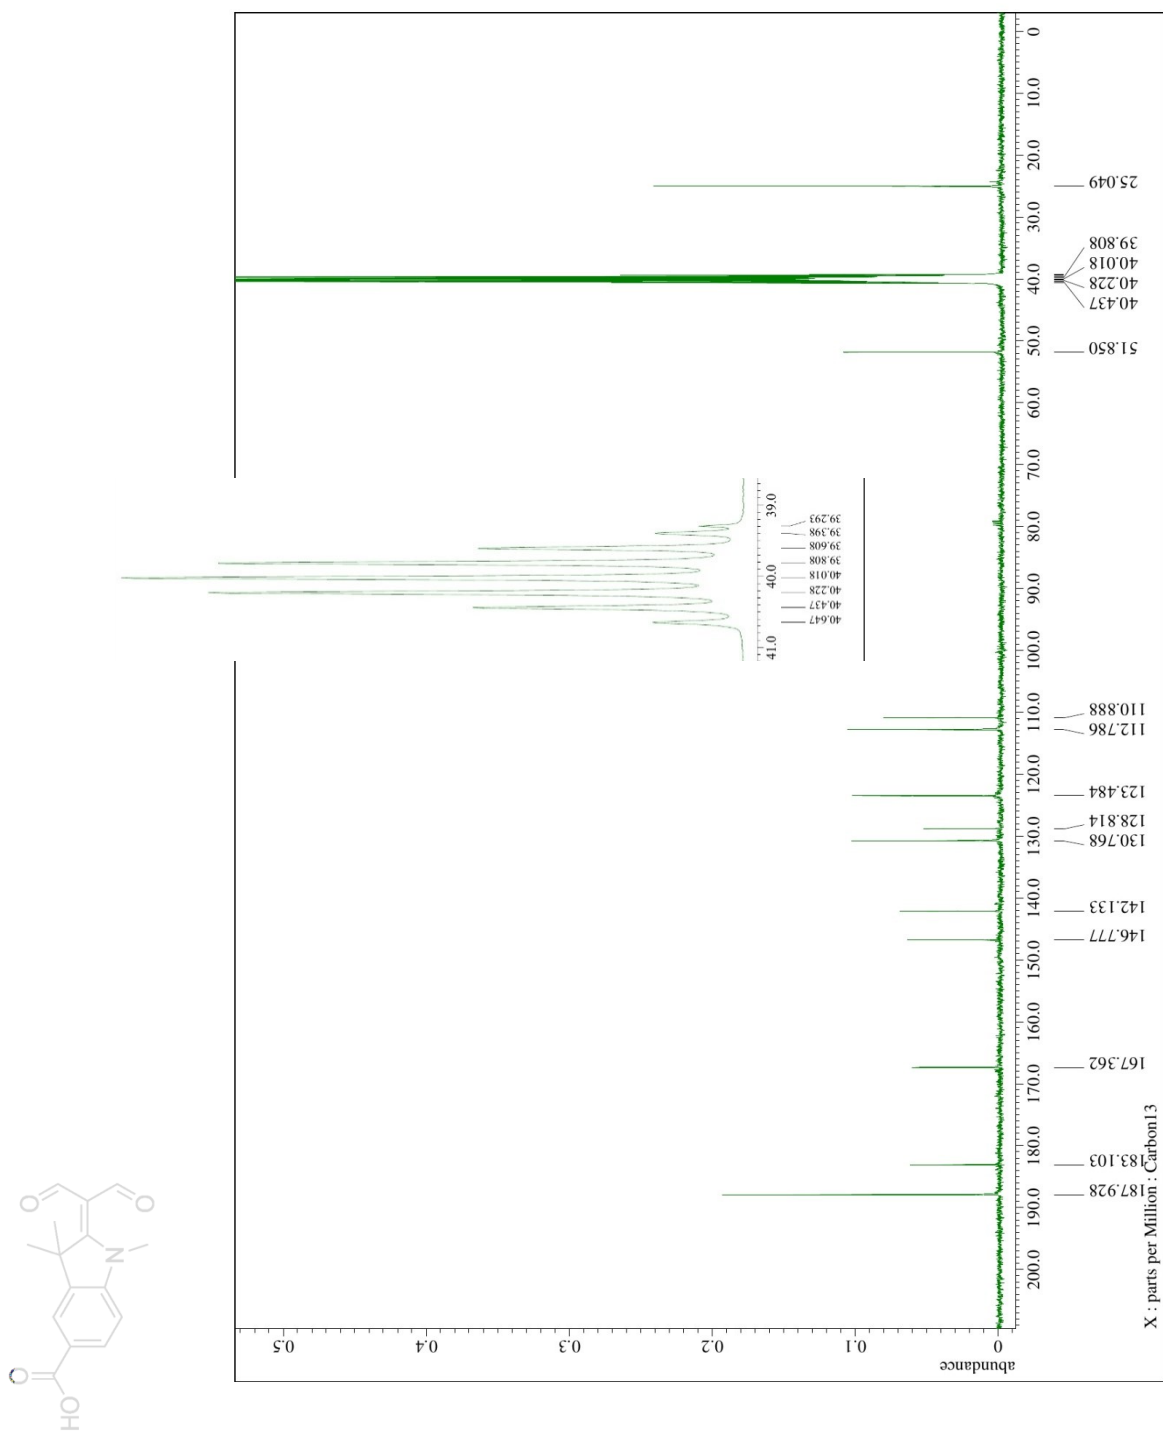

**Fig. S10:**  $^{13}\text{C}$  NMR (100 MHz, DMSO) spectrum of **10**.

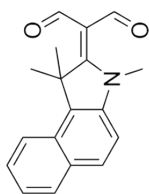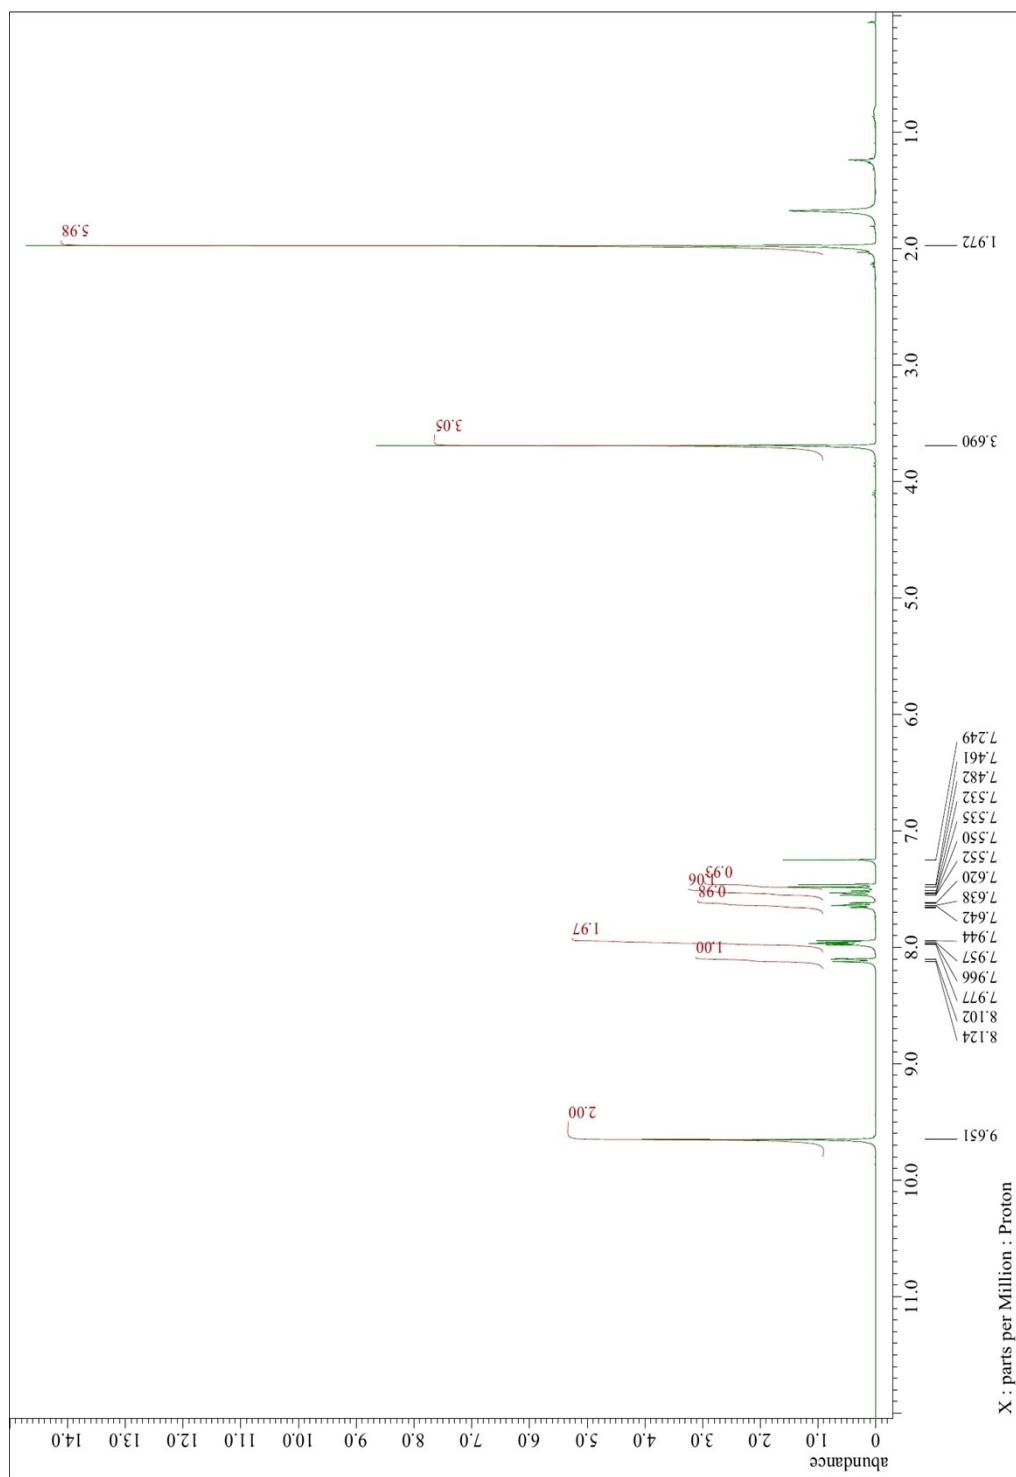

**Fig. S11:**  $^1\text{H}$  NMR (400 MHz,  $\text{CDCl}_3$ ) spectrum of **11**.

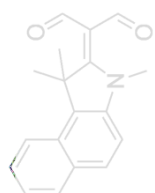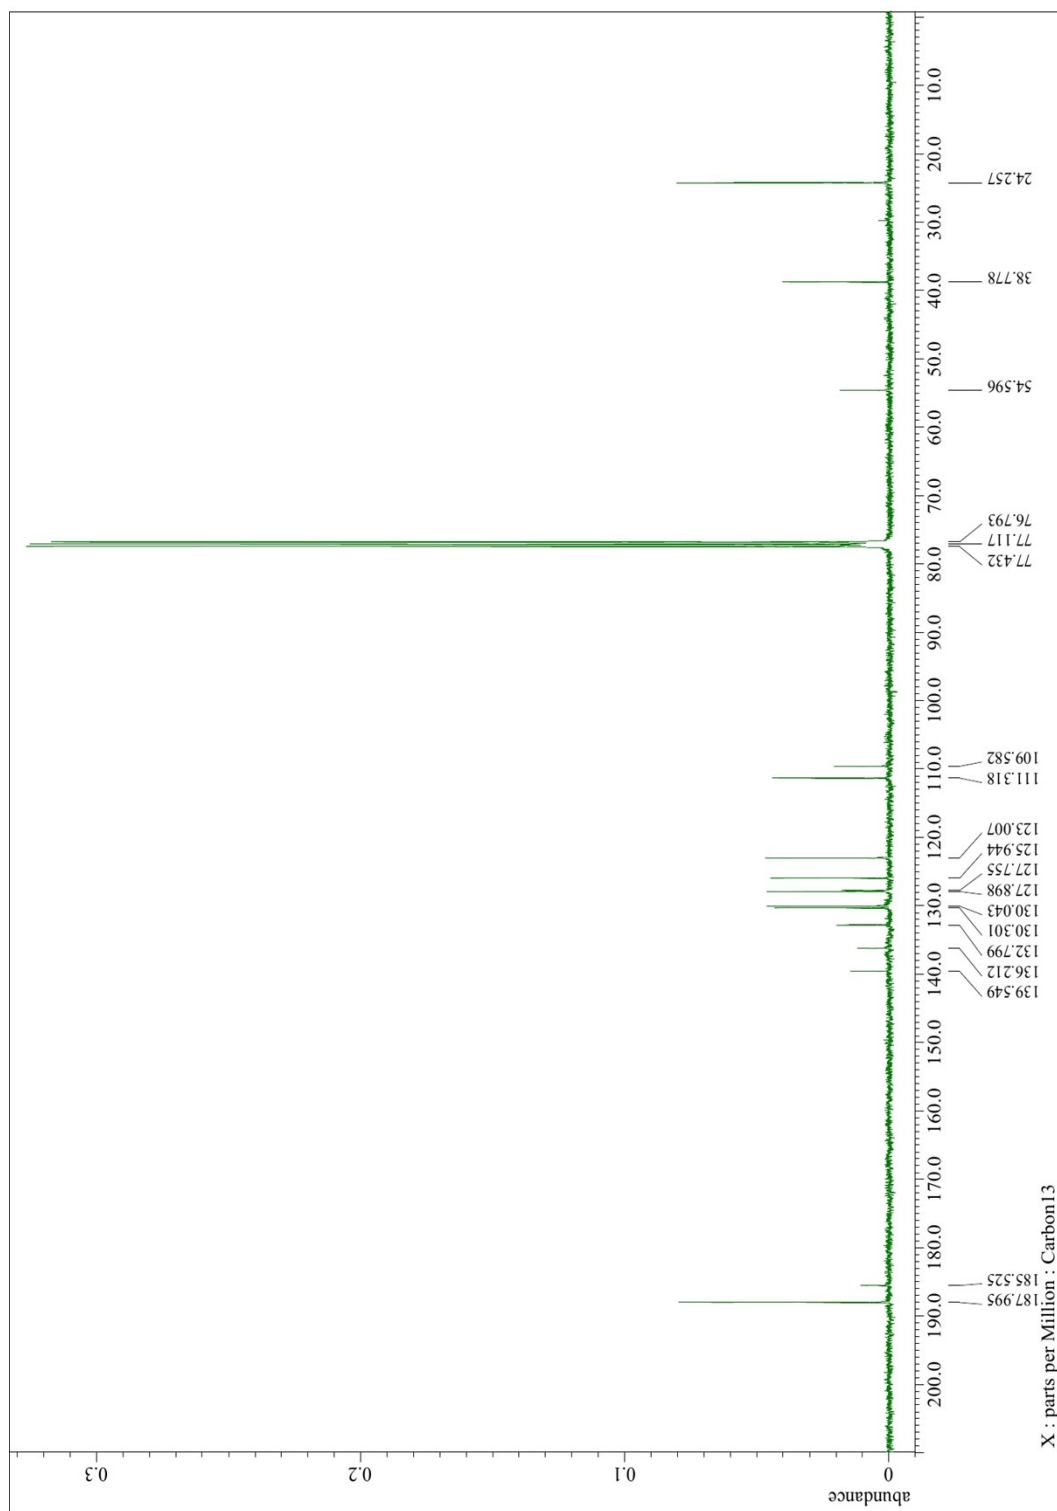

**Fig. S12:**  $^{13}\text{C}$  NMR (100 MHz,  $\text{CDCl}_3$ ) spectrum of **11**.

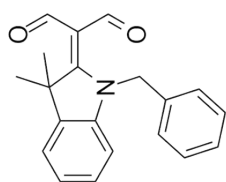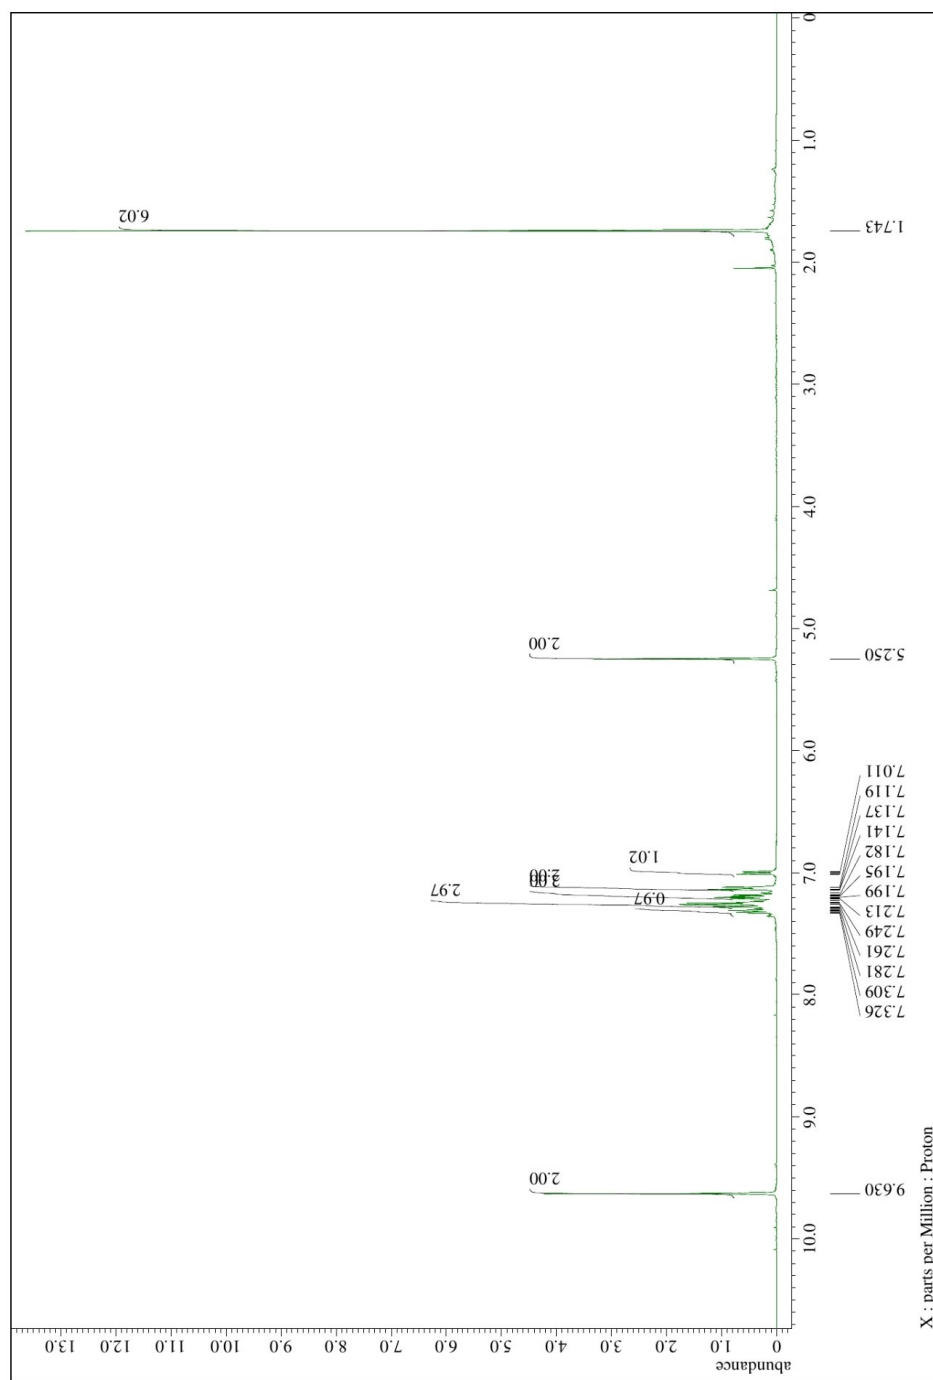

**Fig. S13:**  $^1\text{H}$  NMR (400 MHz,  $\text{CDCl}_3$ ) spectrum of **12**.



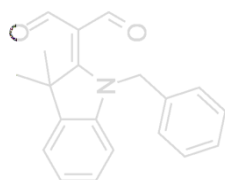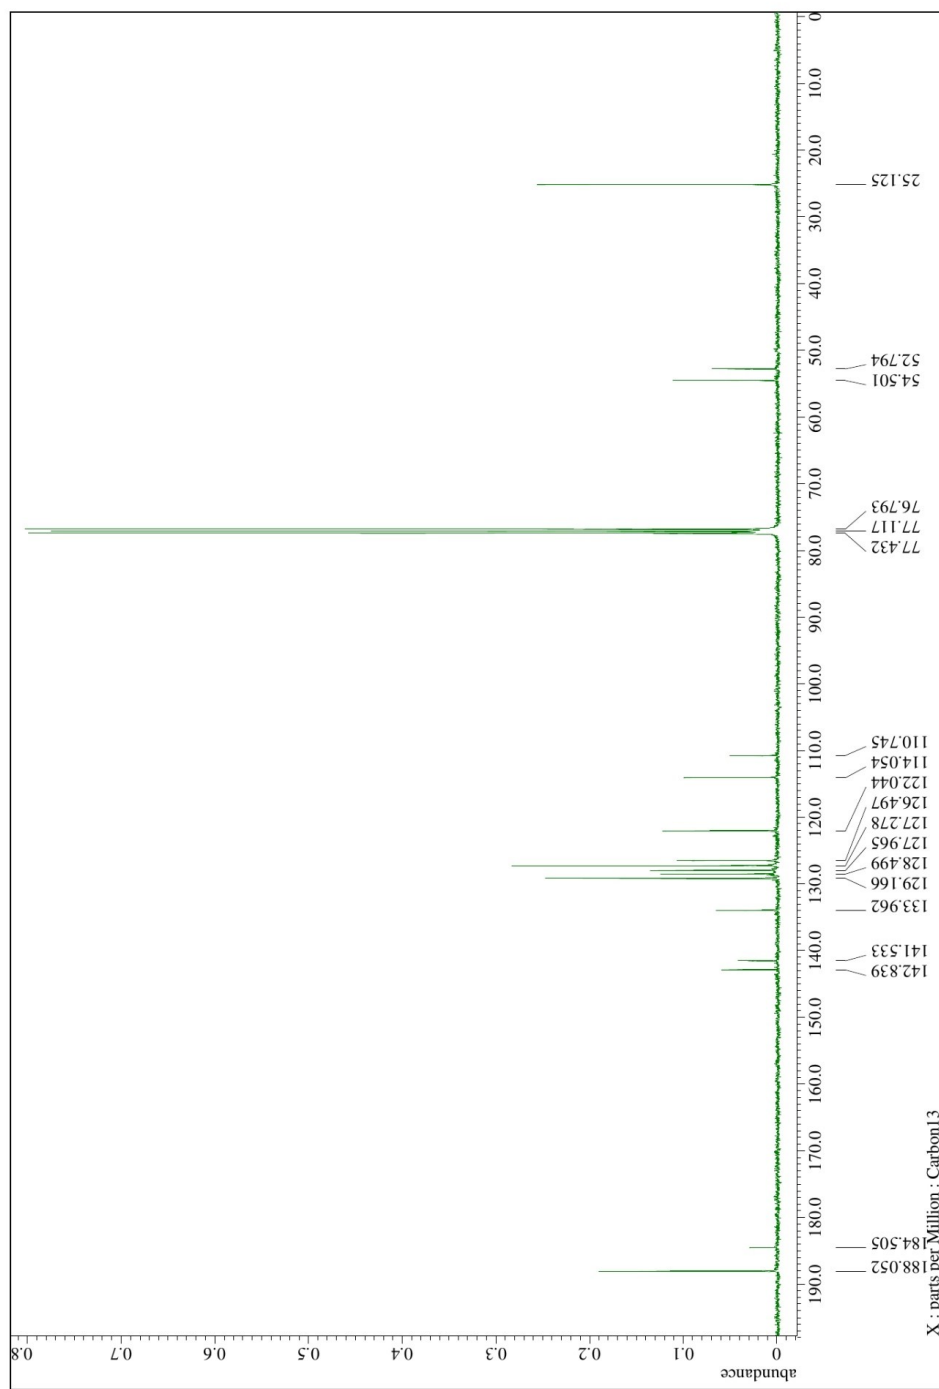

**Fig. S14:**  $^{13}\text{C}$  NMR (100 MHz,  $\text{CDCl}_3$ ) spectrum of **12**.

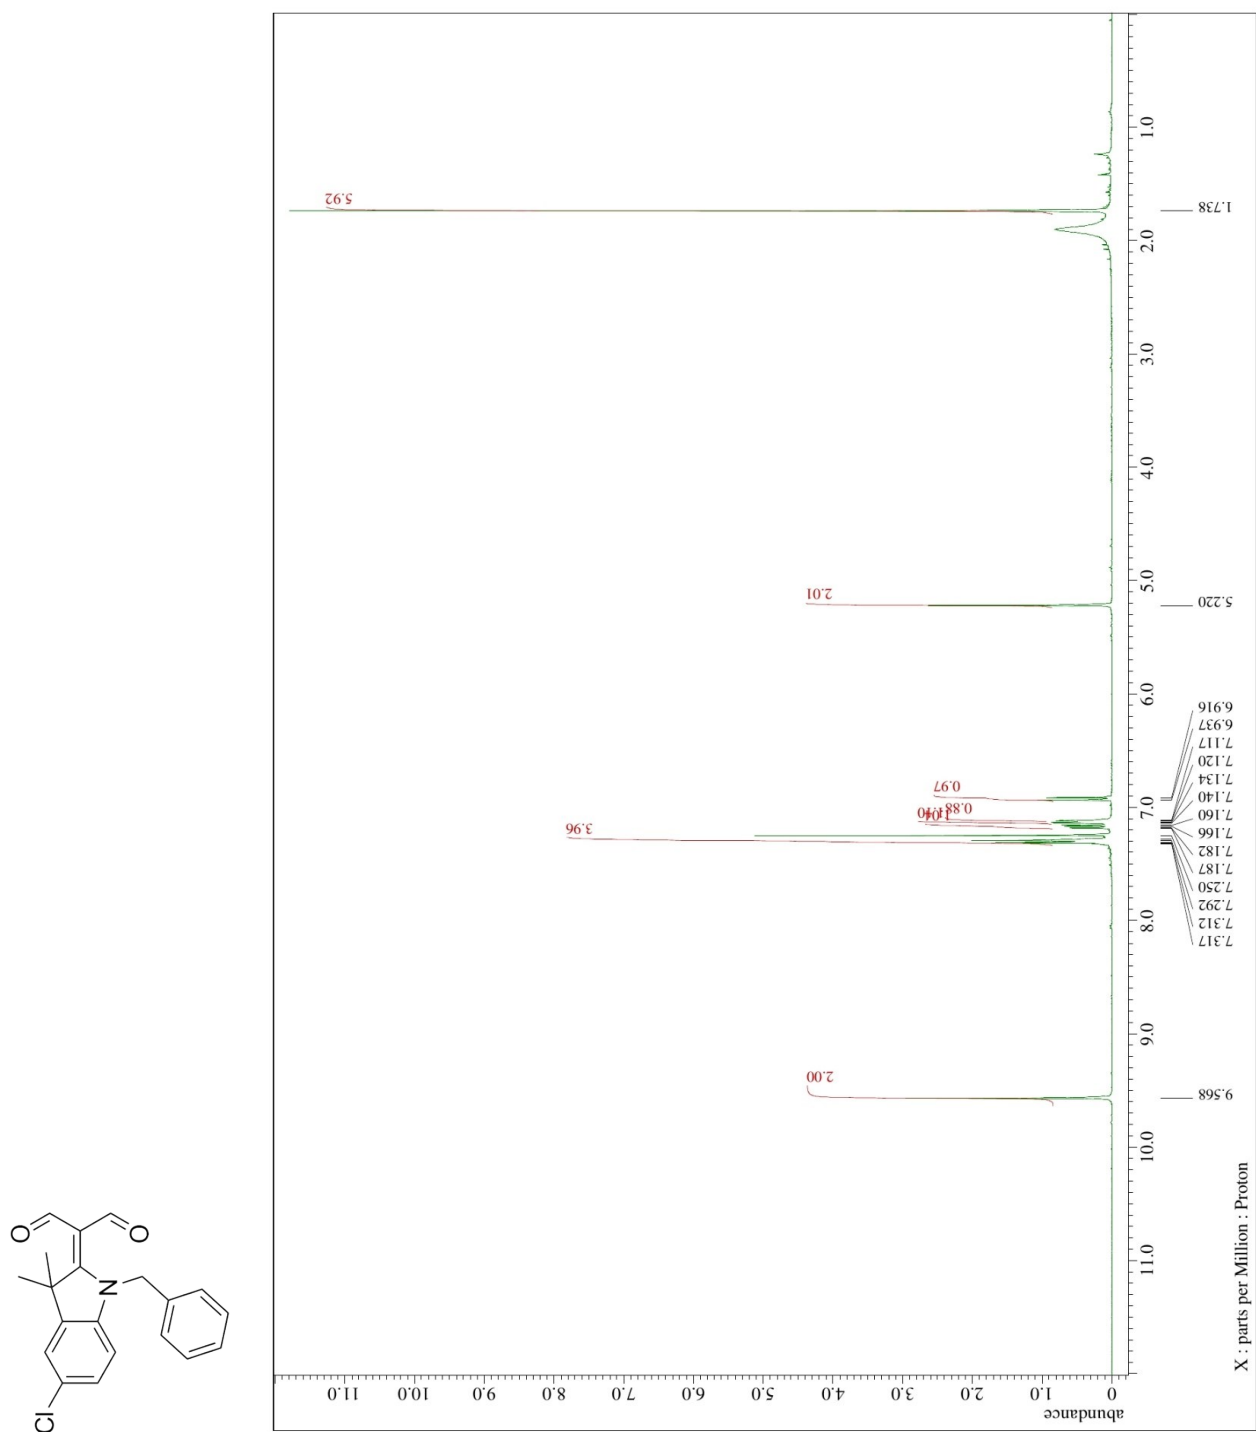

**Fig. S15:**  $^1\text{H}$  NMR (400 MHz,  $\text{CDCl}_3$ ) spectrum of **13**.

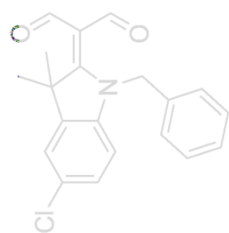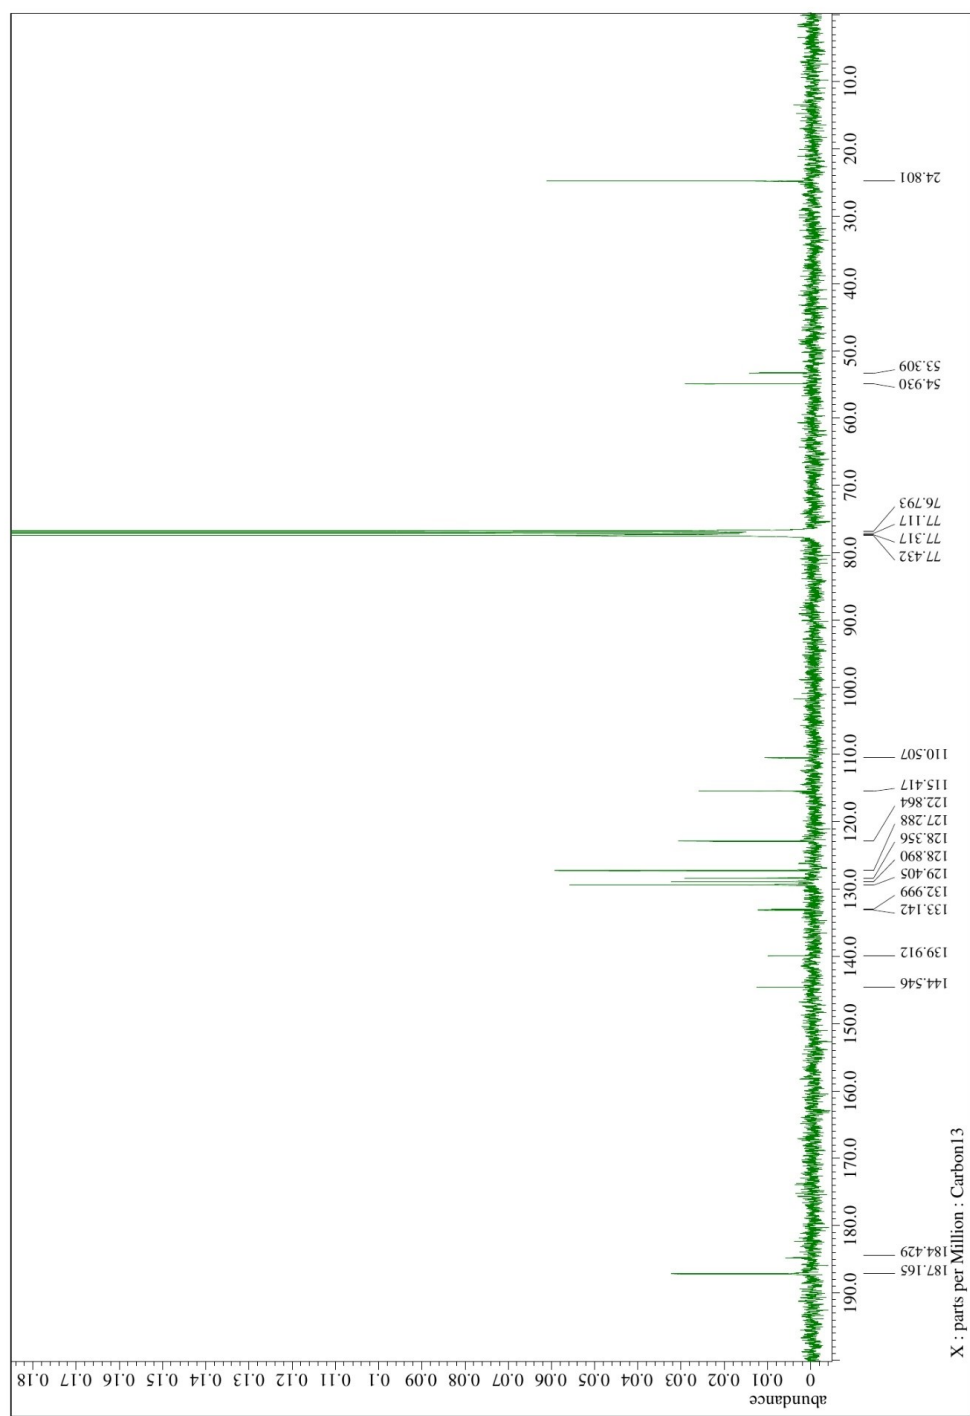

**Fig. S16:**  $^{13}\text{C}$  NMR (100 MHz,  $\text{CDCl}_3$ ) spectrum of **13**.

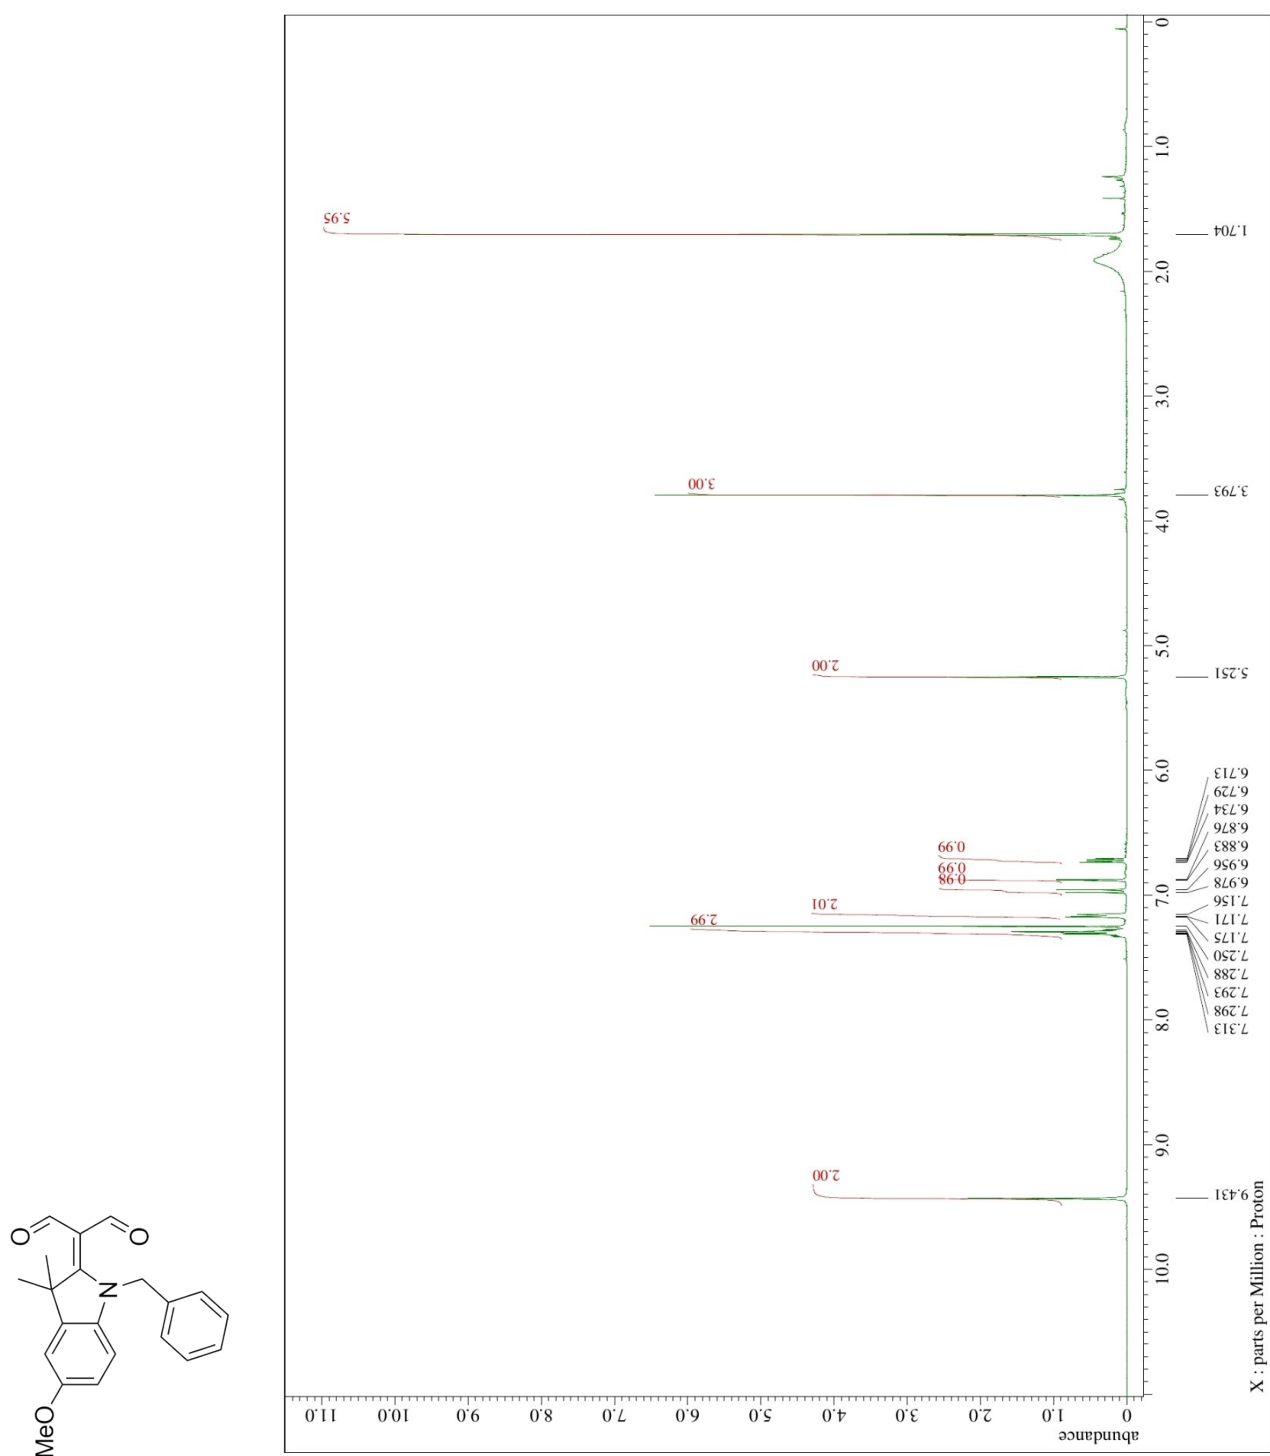

Fig. S17:  $^1\text{H}$  NMR (400 MHz,  $\text{CDCl}_3$ ) spectrum of 14.

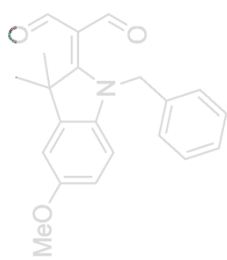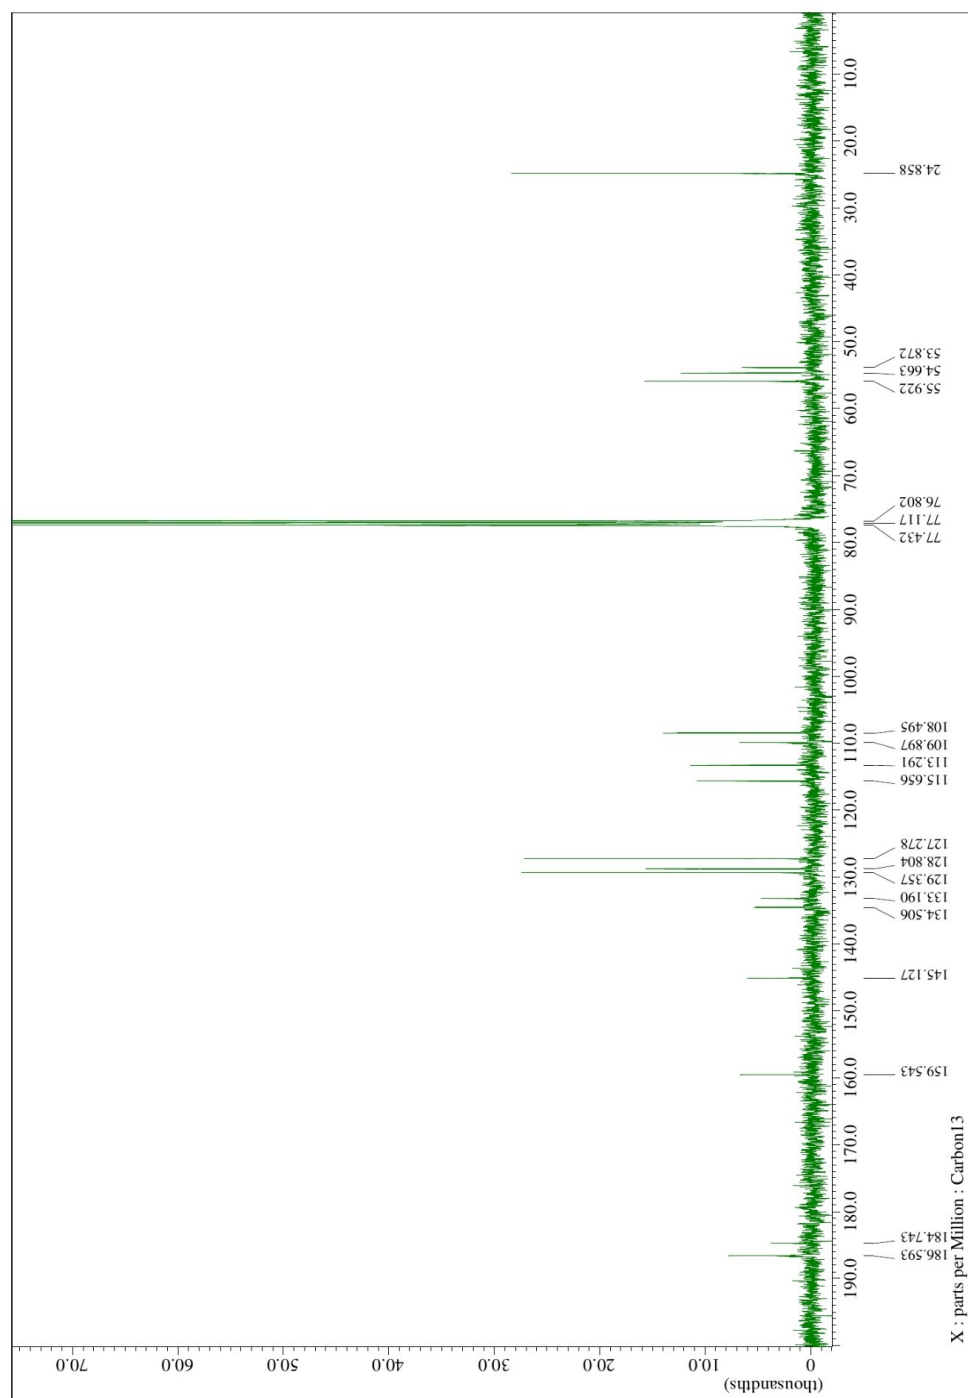

**Fig. S18:**  $^{13}\text{C}$  NMR (100 MHz,  $\text{CDCl}_3$ ) spectrum of **14**.

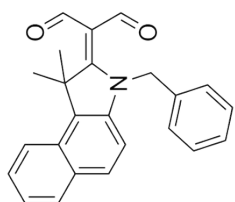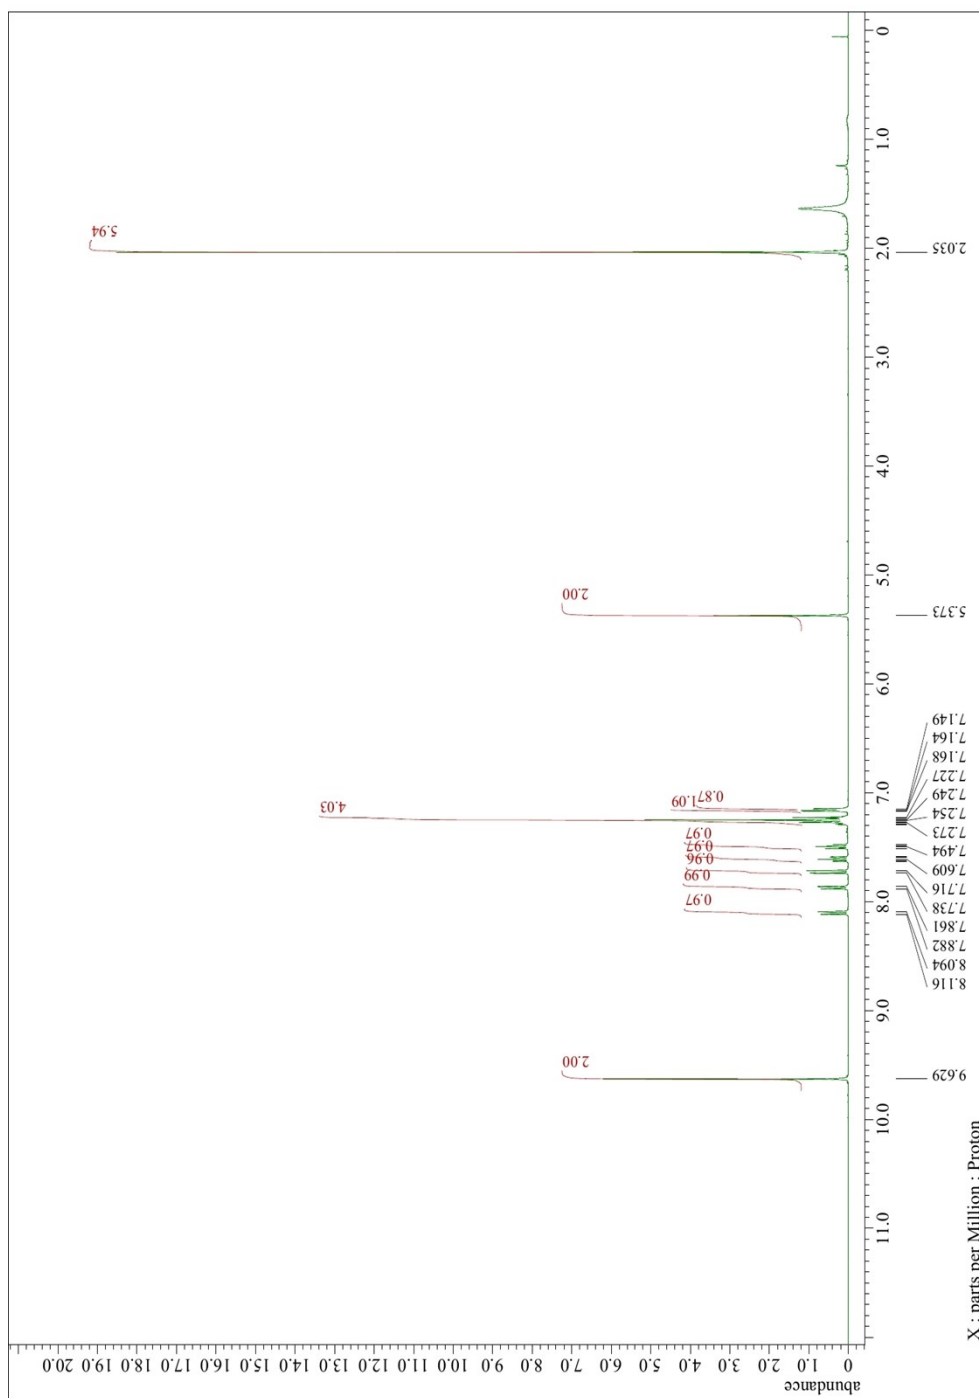

**Fig. S19:**  $^1\text{H}$  NMR (400 MHz,  $\text{CDCl}_3$ ) spectrum of 15.

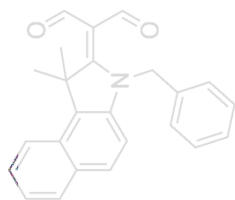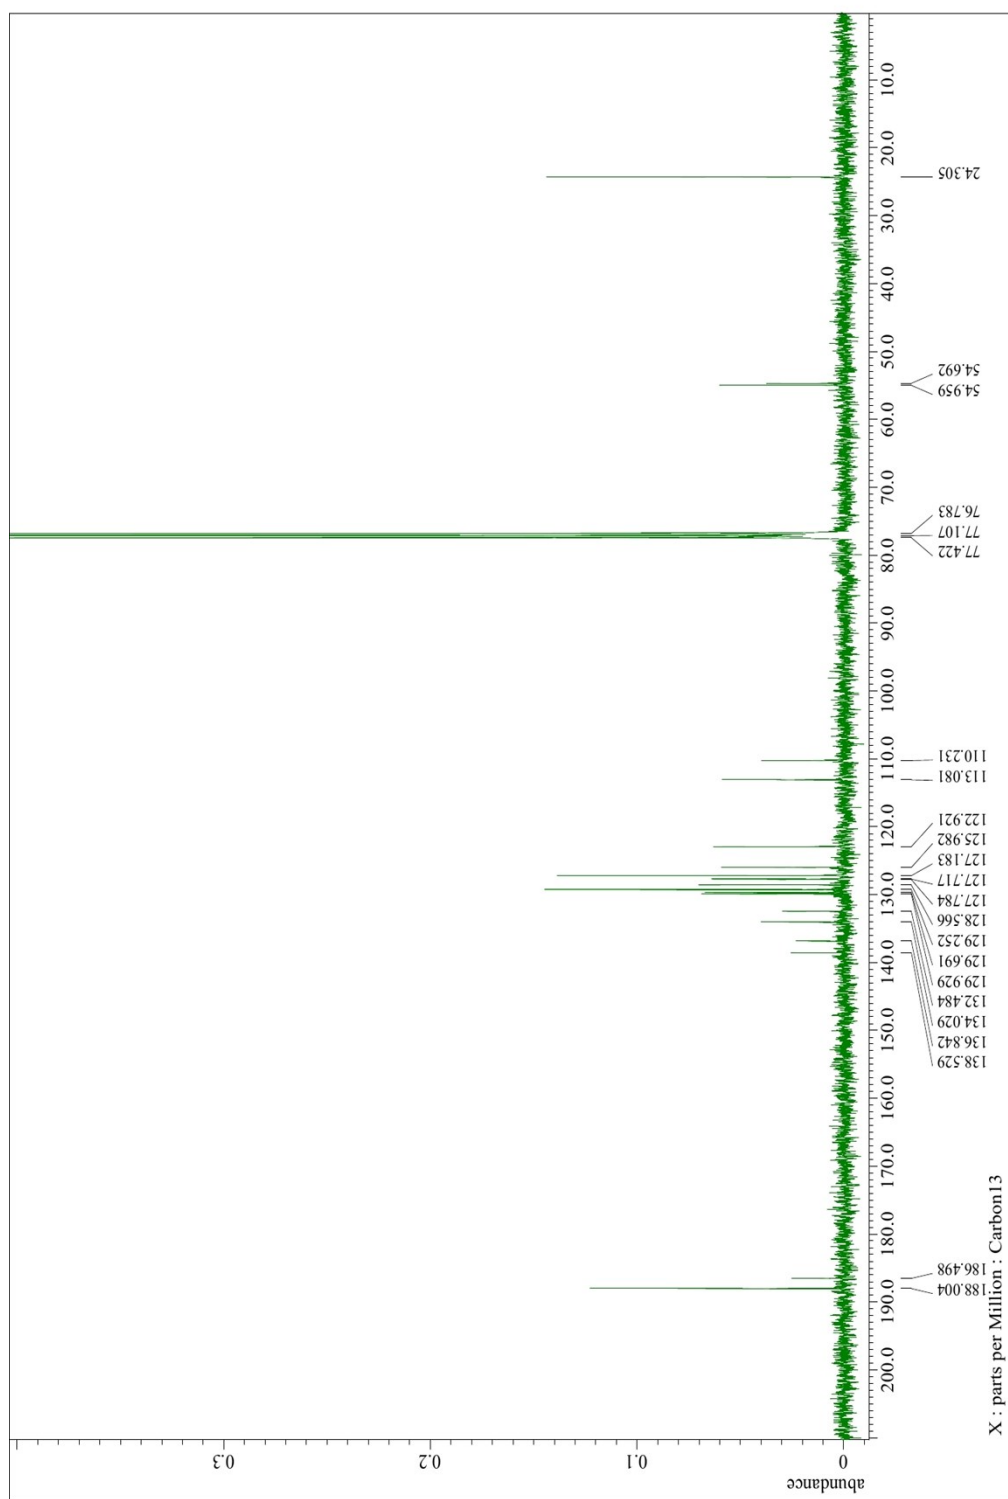

**Fig. S20:**  $^{13}\text{C}$  NMR (100 MHz,  $\text{CDCl}_3$ ) spectrum of **15**.

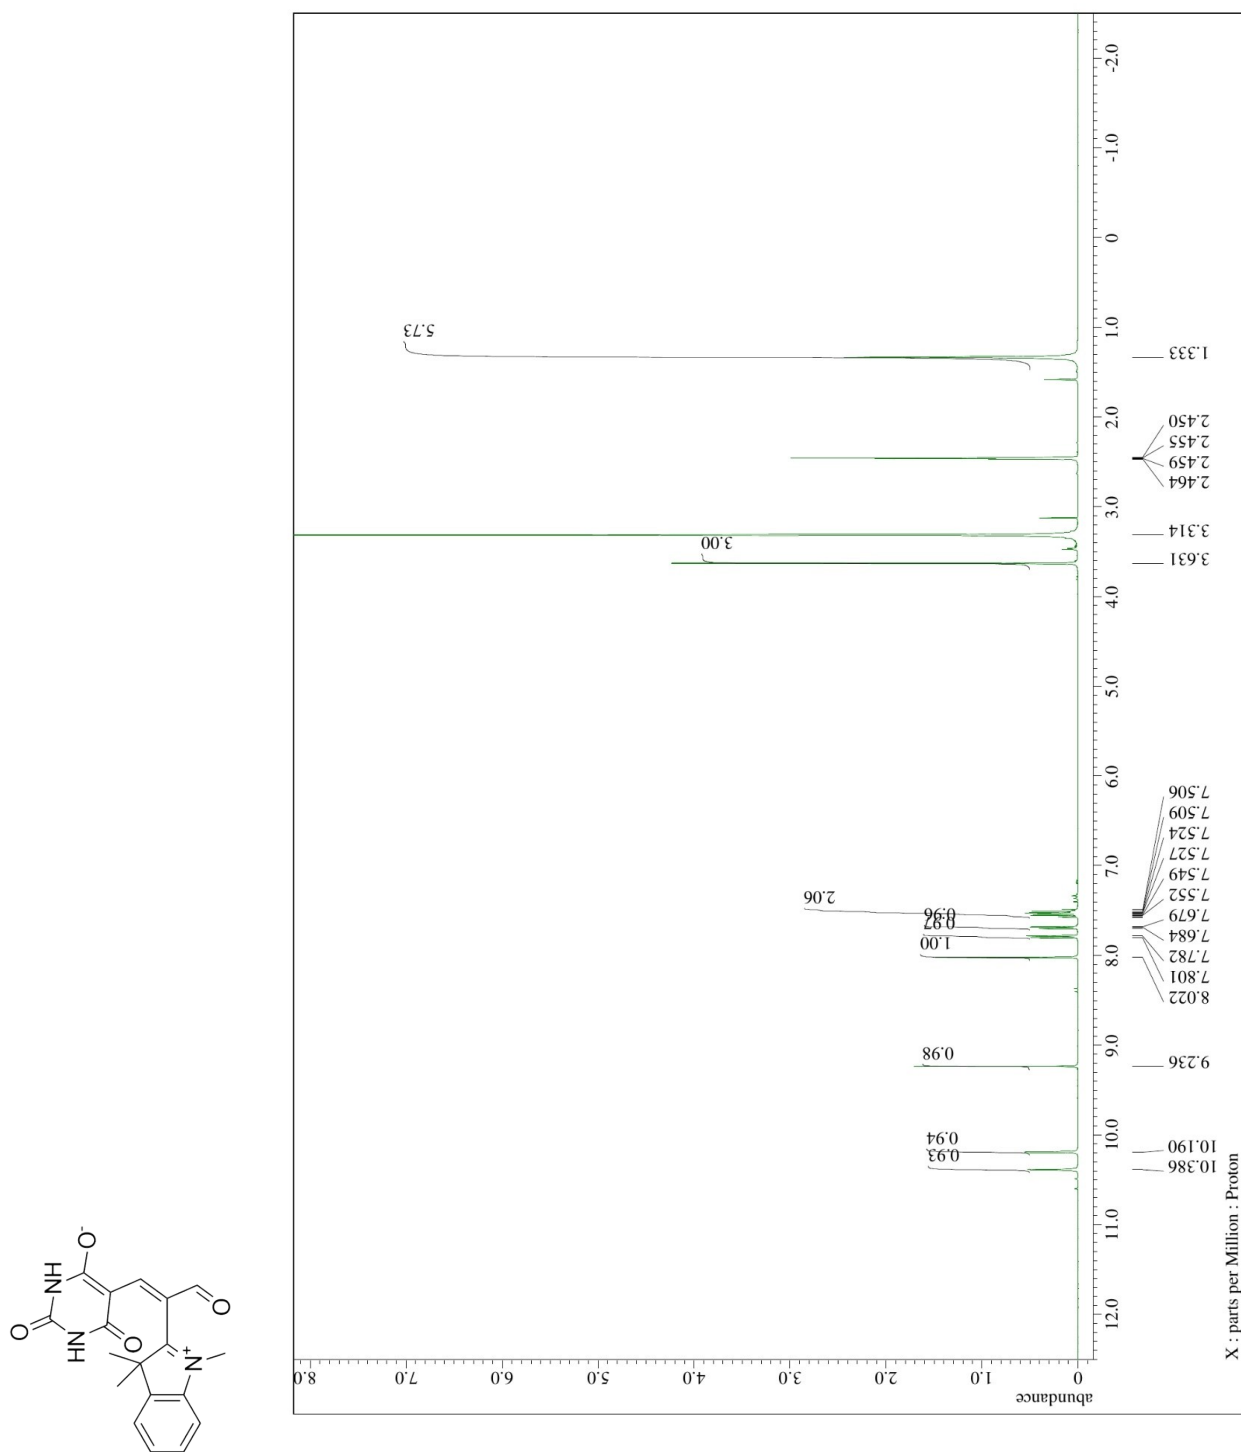

**Fig. S21:**  $^1\text{H}$  NMR (400 MHz, DMSO) spectrum of 16.





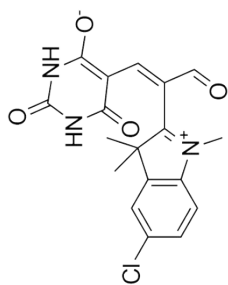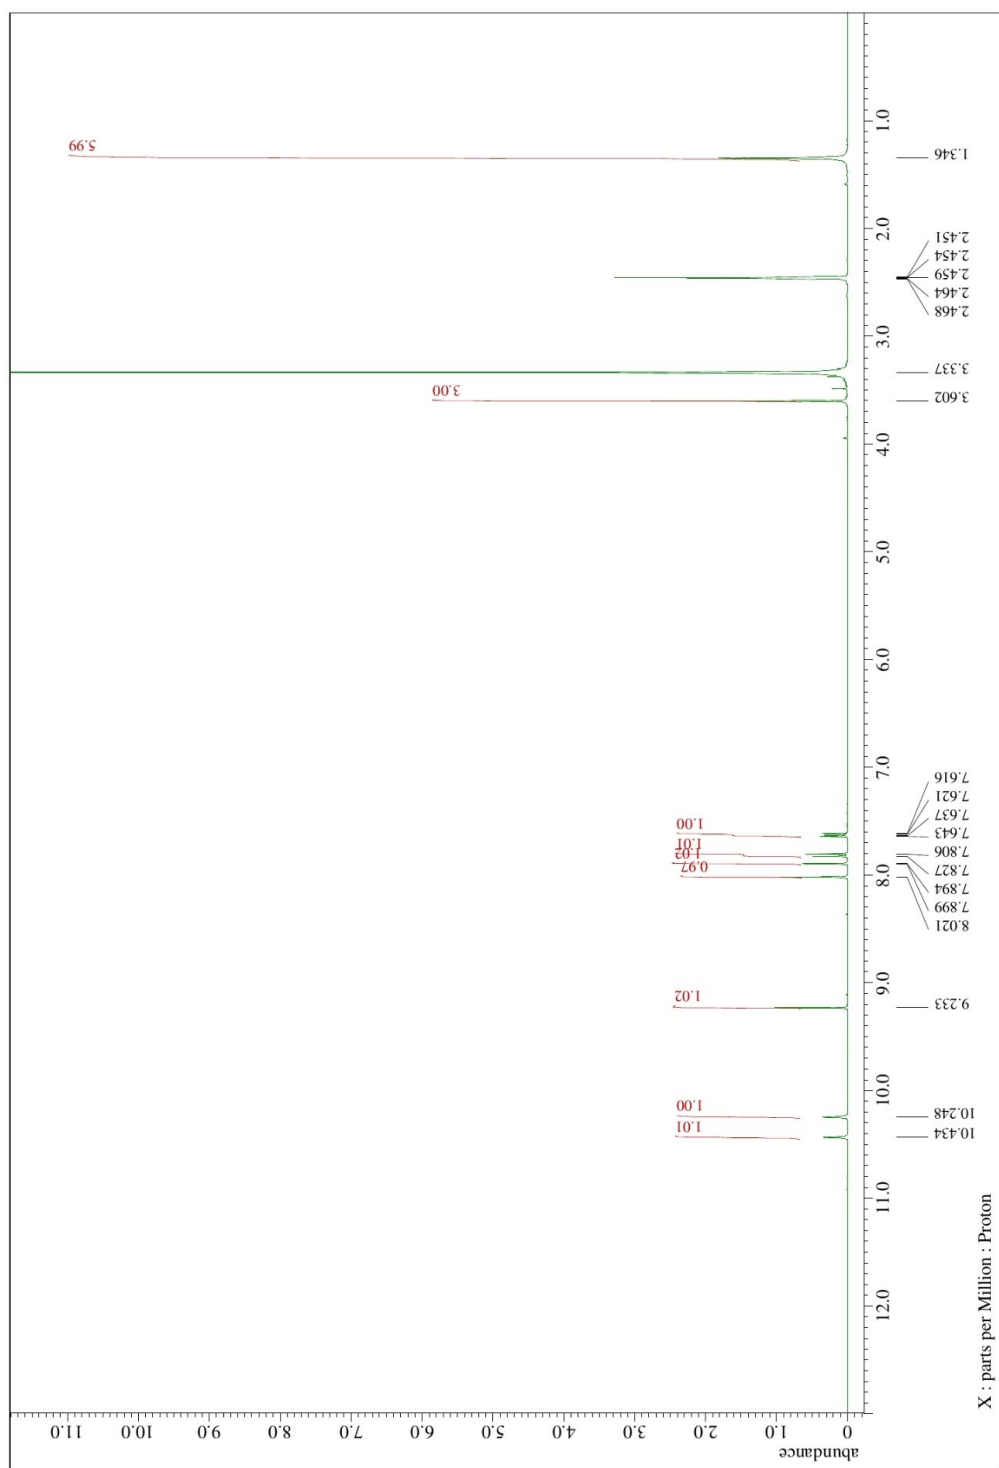

**Fig. S23:**  $^1\text{H}$  NMR (400 MHz, DMSO) spectrum of **17**.

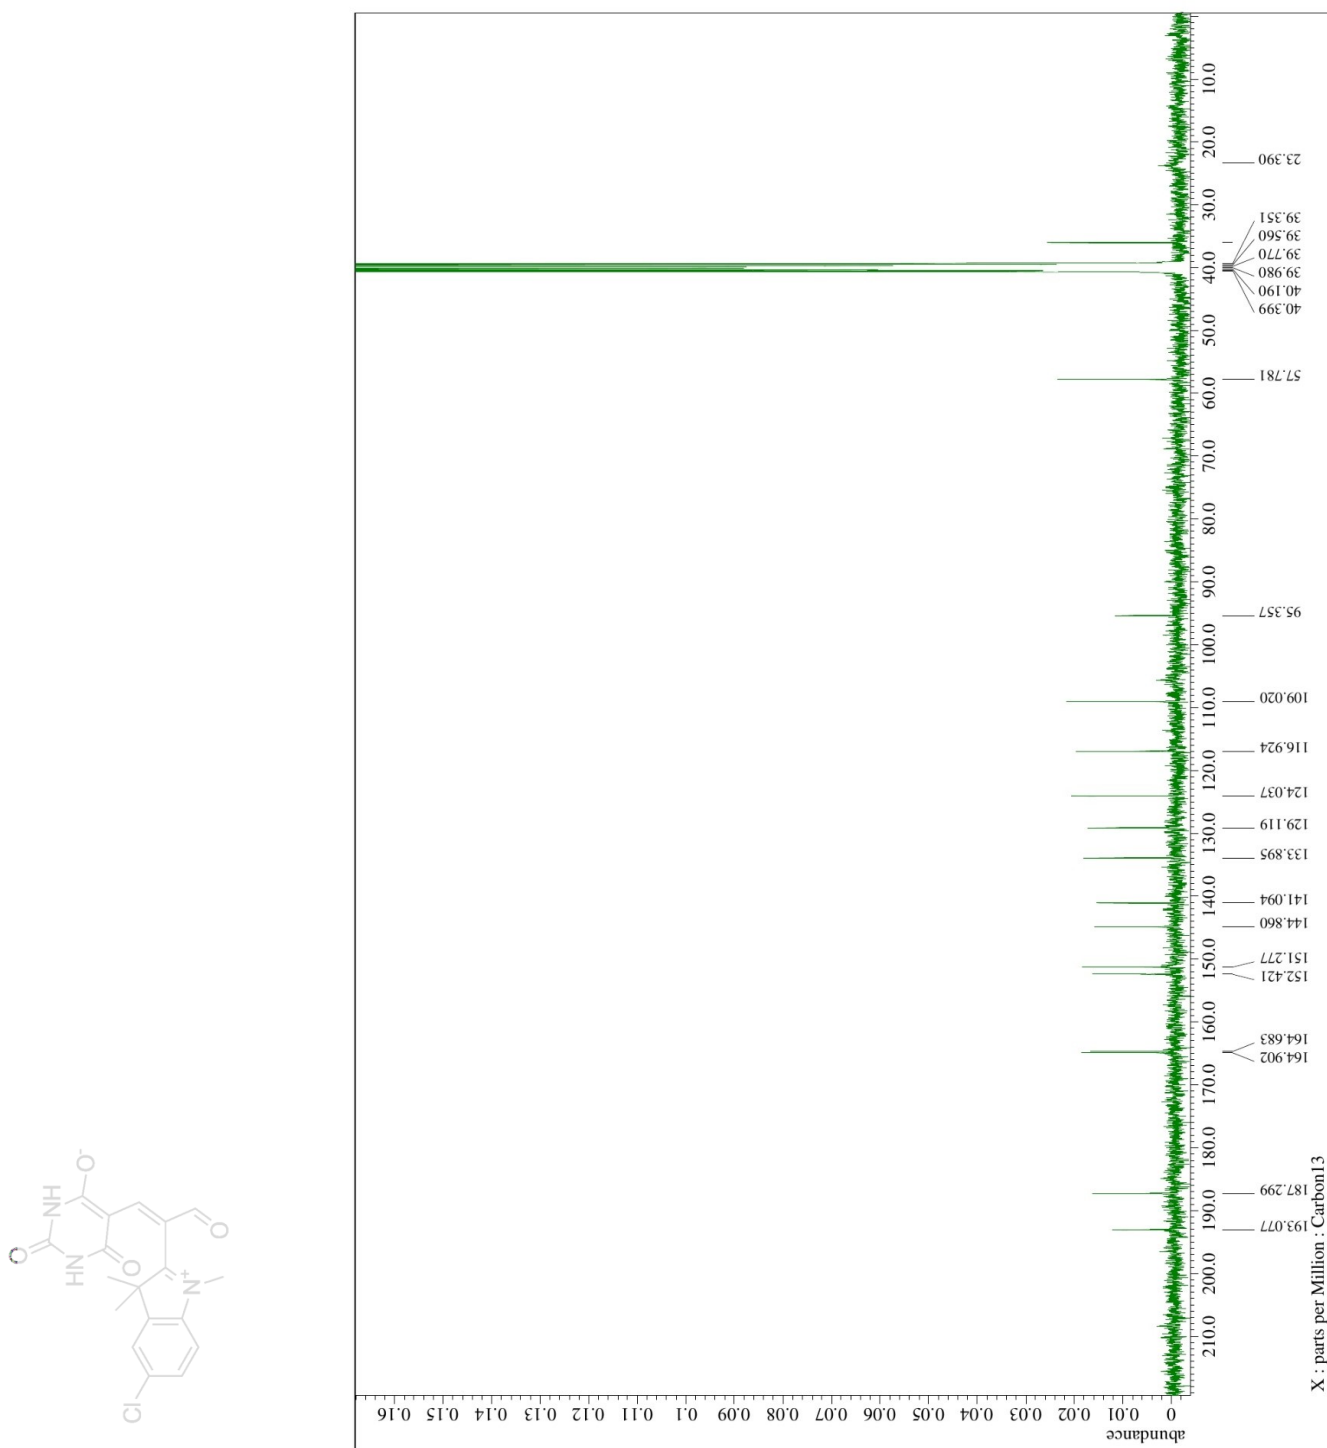

**Fig. S24:** <sup>13</sup>C NMR (100 MHz, DMSO) spectrum of 17.

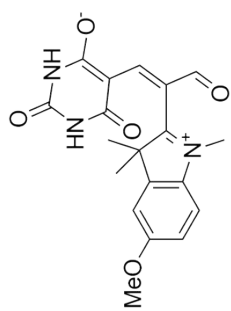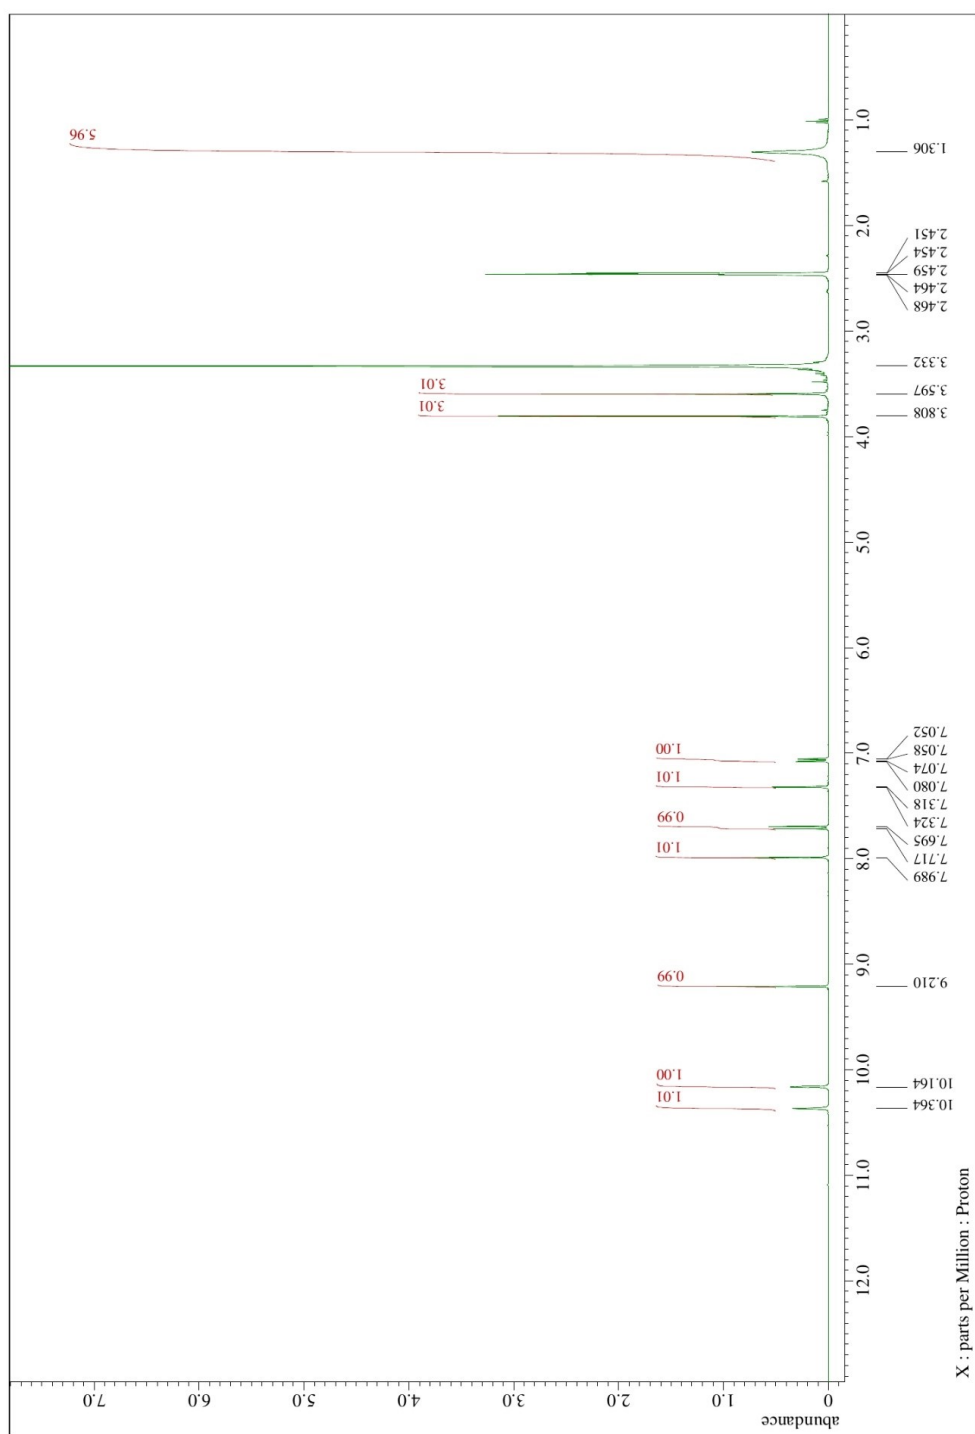

**Fig. S25:**  $^1\text{H}$  NMR (400 MHz, DMSO) spectrum of **18**.

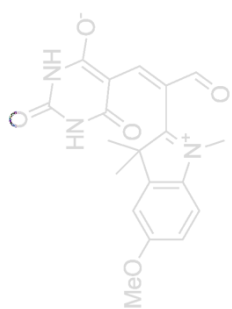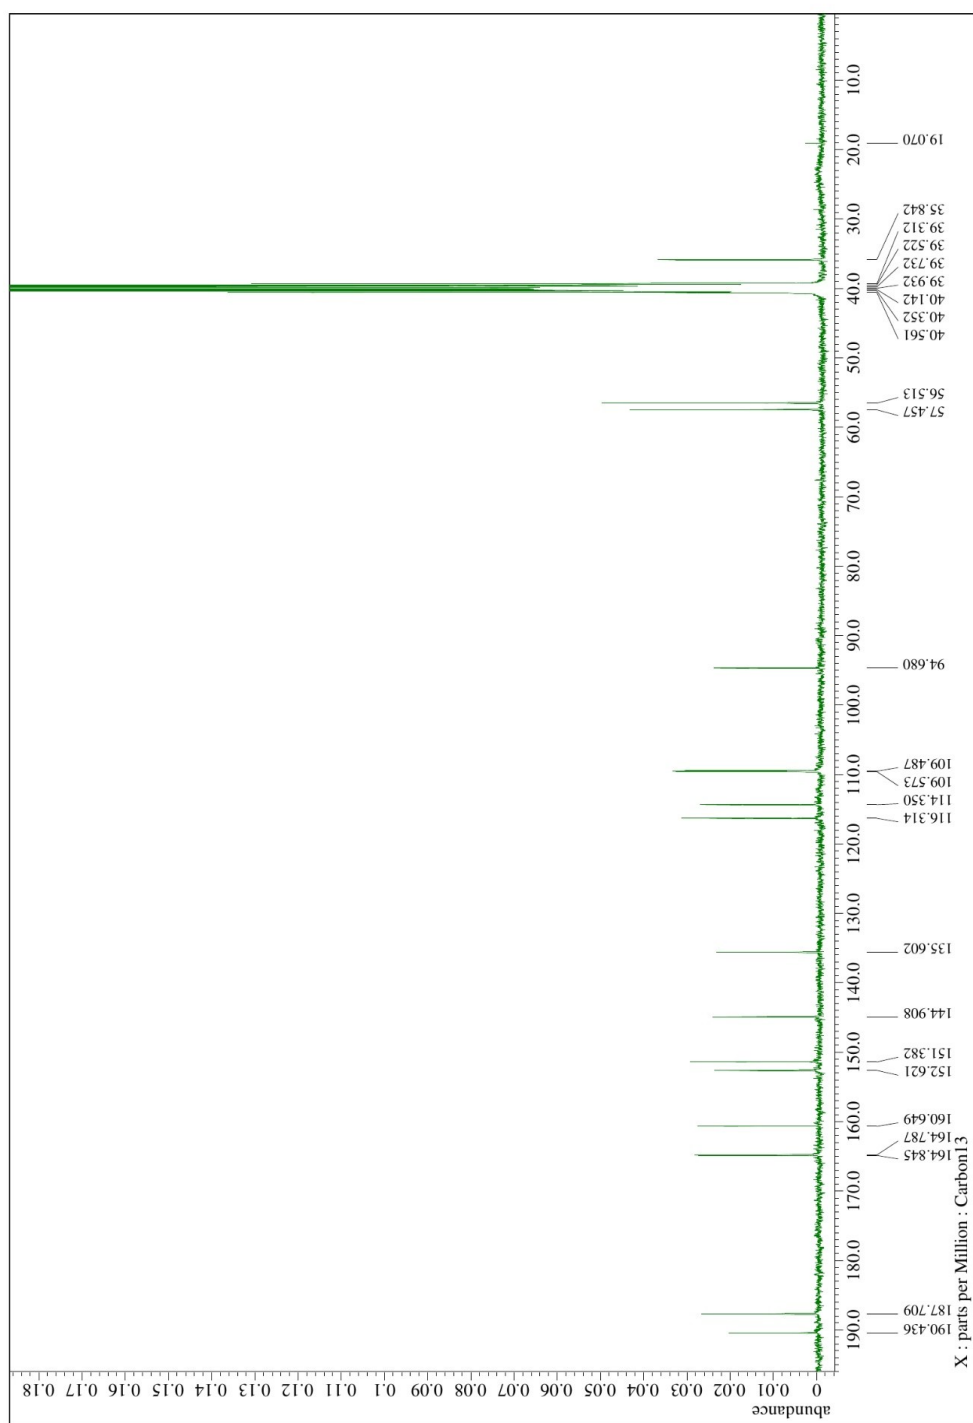

**Fig. S26:**  $^{13}\text{C}$  NMR (100 MHz, DMSO) spectrum of **18**.

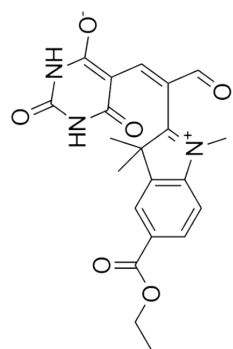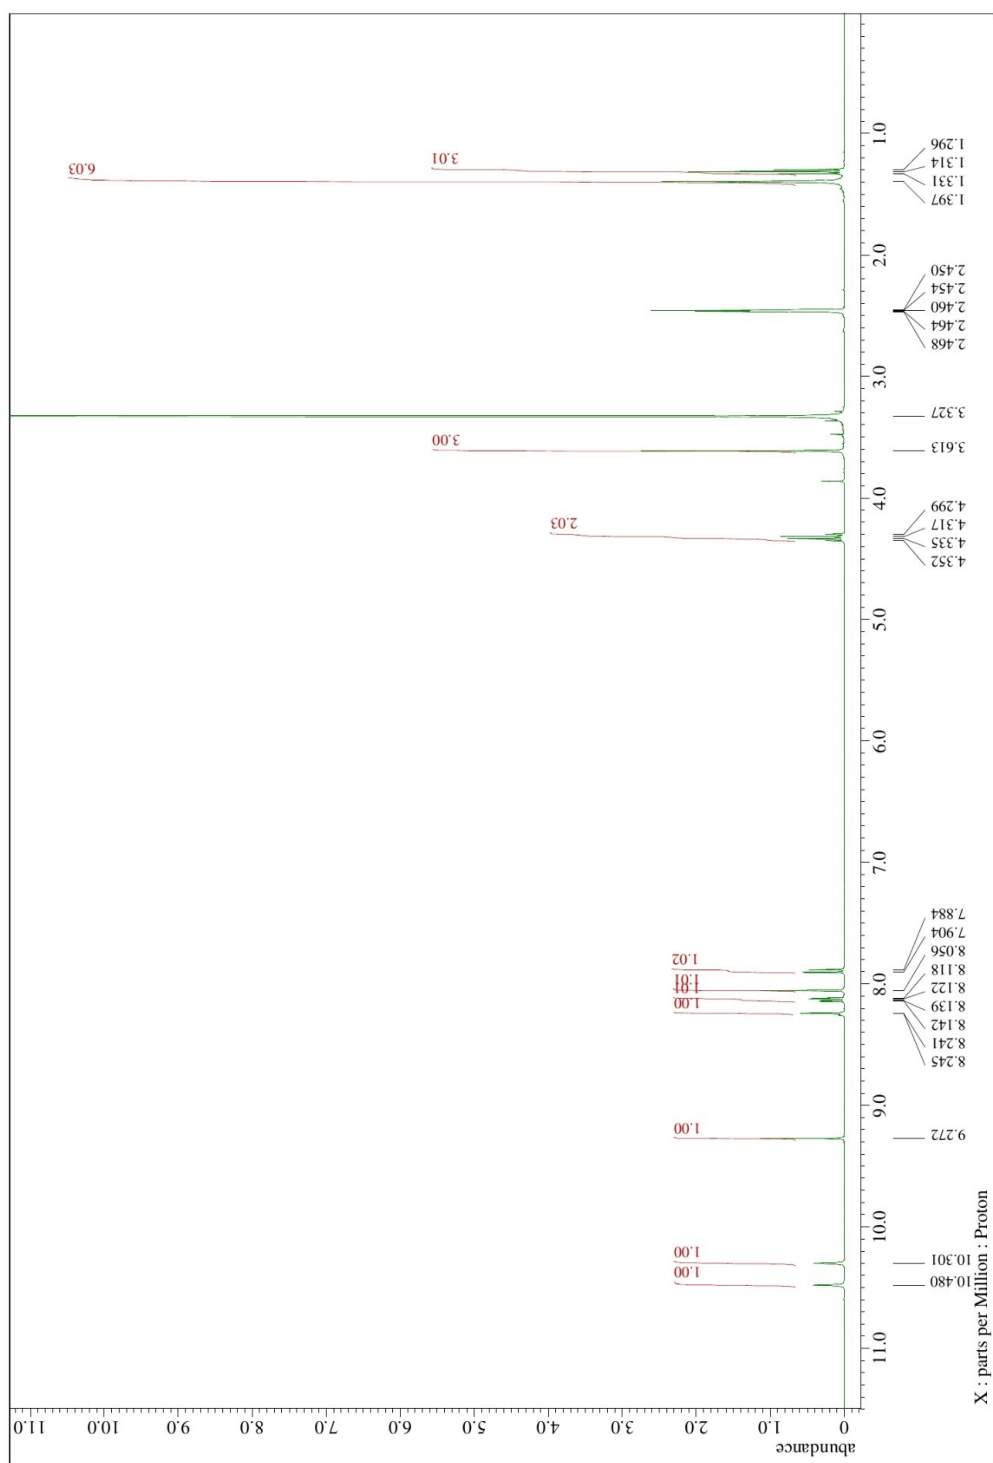

Fig. S27:  $^1\text{H}$  NMR (400 MHz, DMSO) spectrum of **19**.

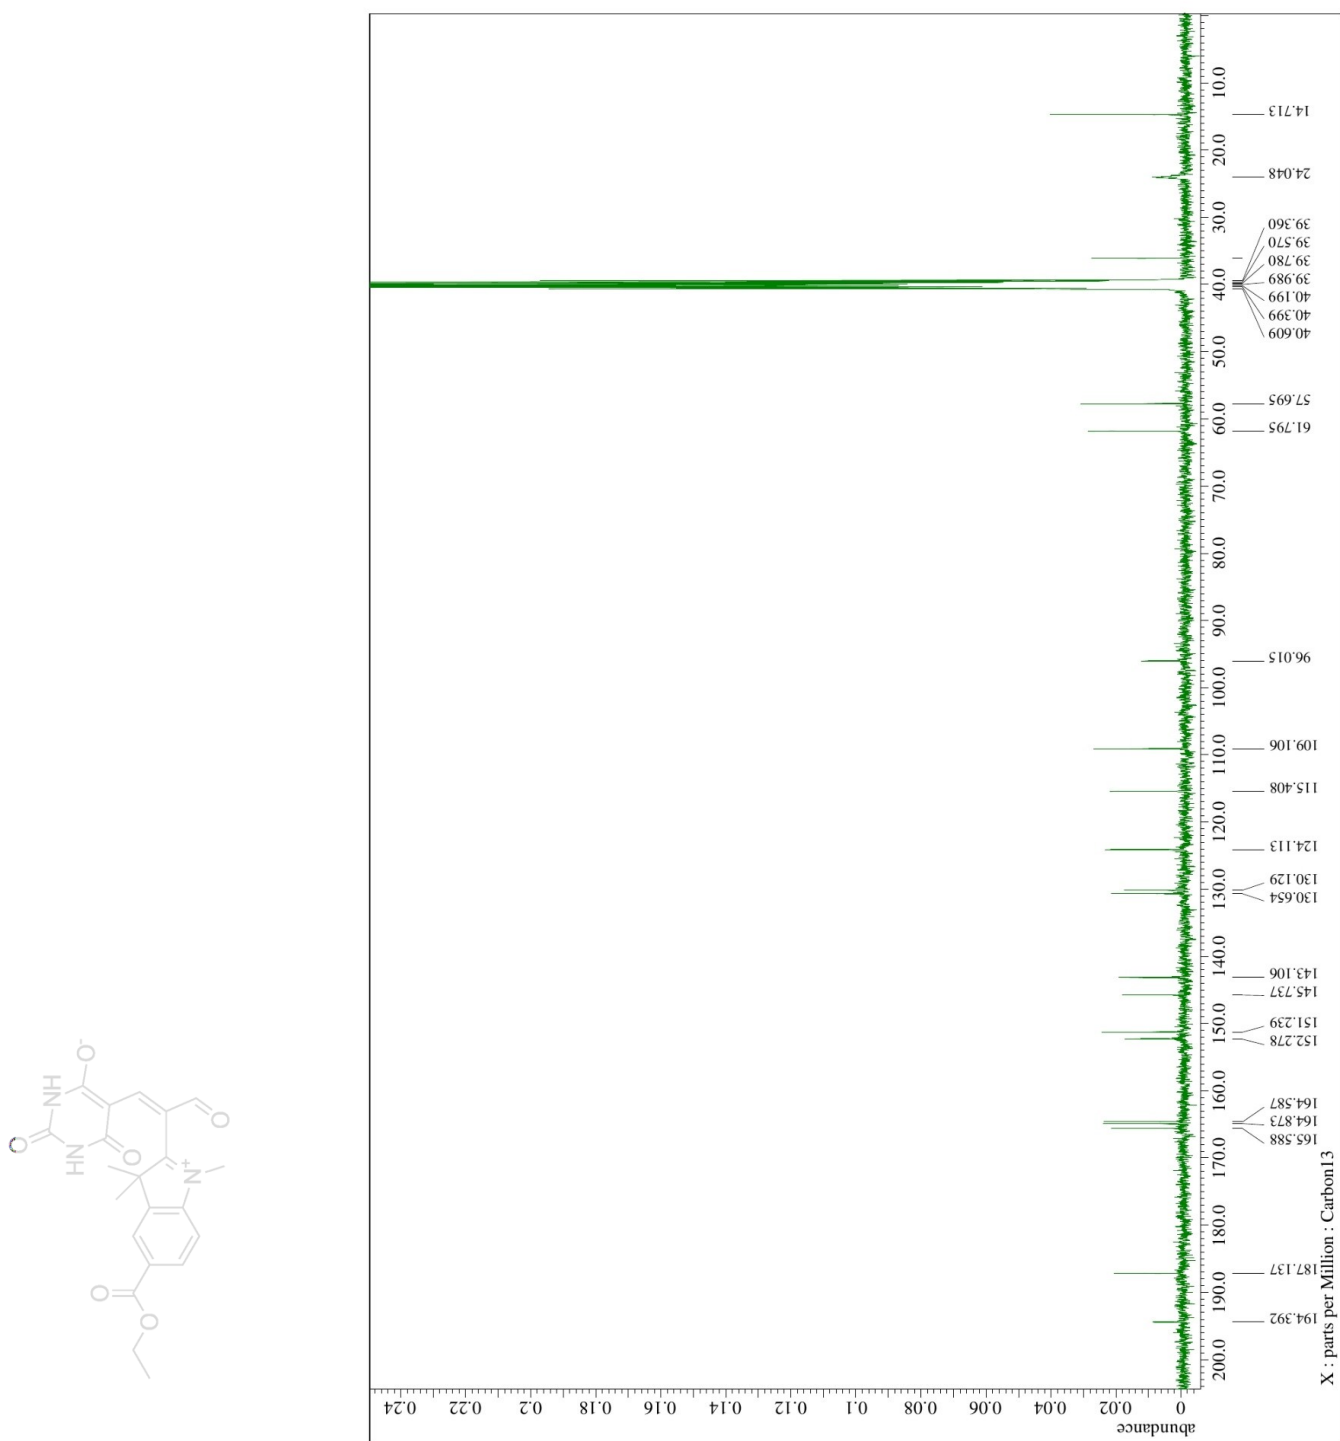

**Fig. S28:** <sup>13</sup>C NMR (100 MHz, DMSO) spectrum of **19**.

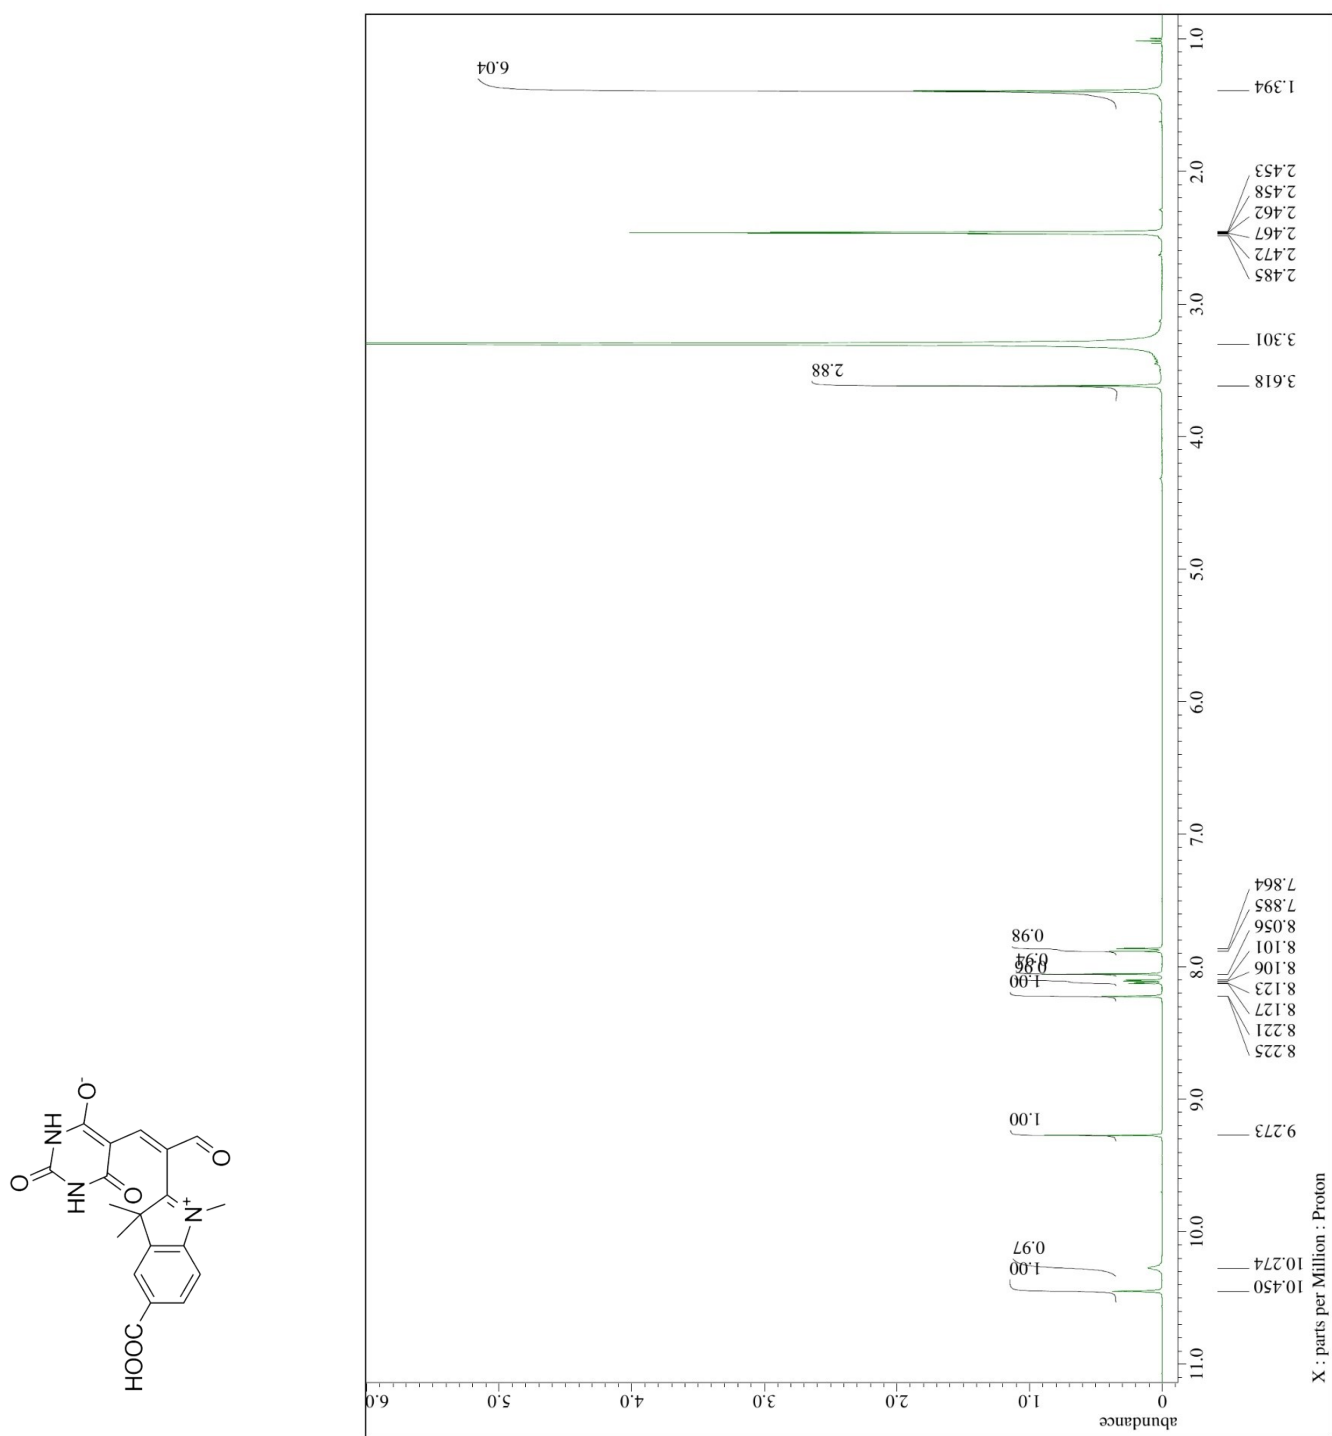

**Fig. S29:**  $^1\text{H}$  NMR (400 MHz, DMSO) spectrum of **20**.



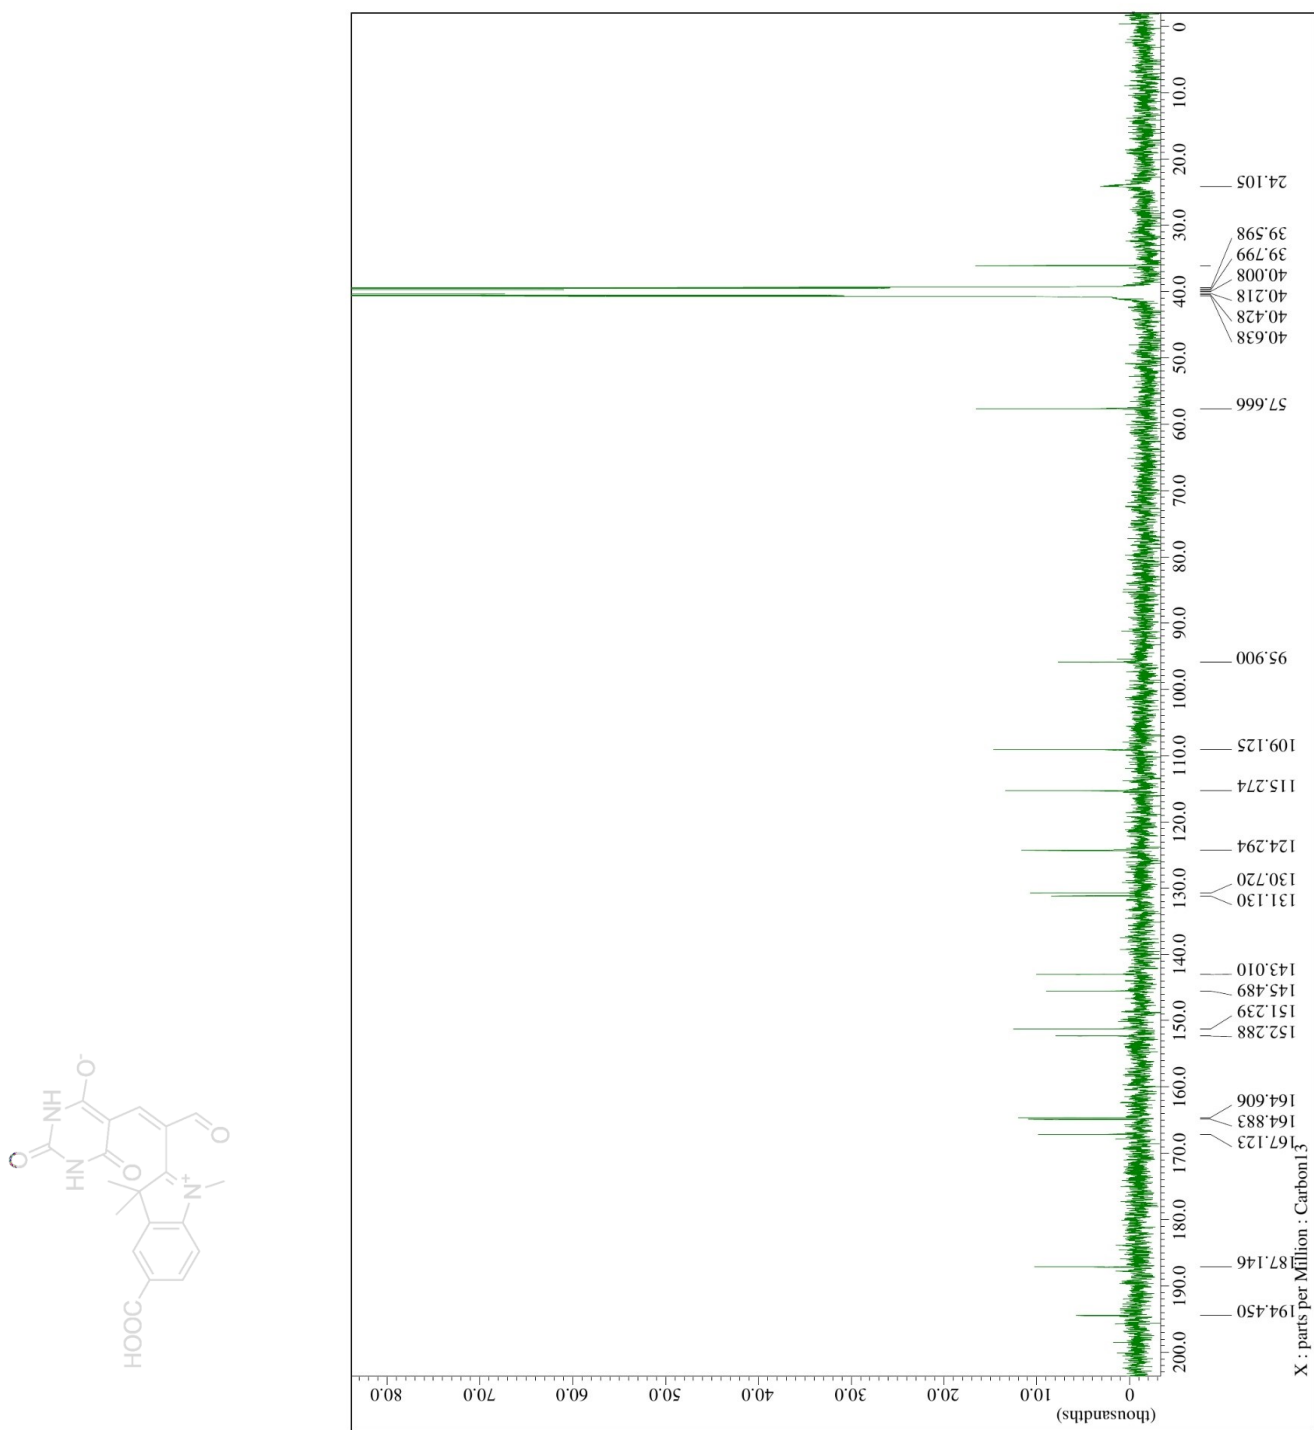

**Fig. S30:**  $^{13}\text{C}$  NMR (100 MHz, DMSO) spectrum of **20**.

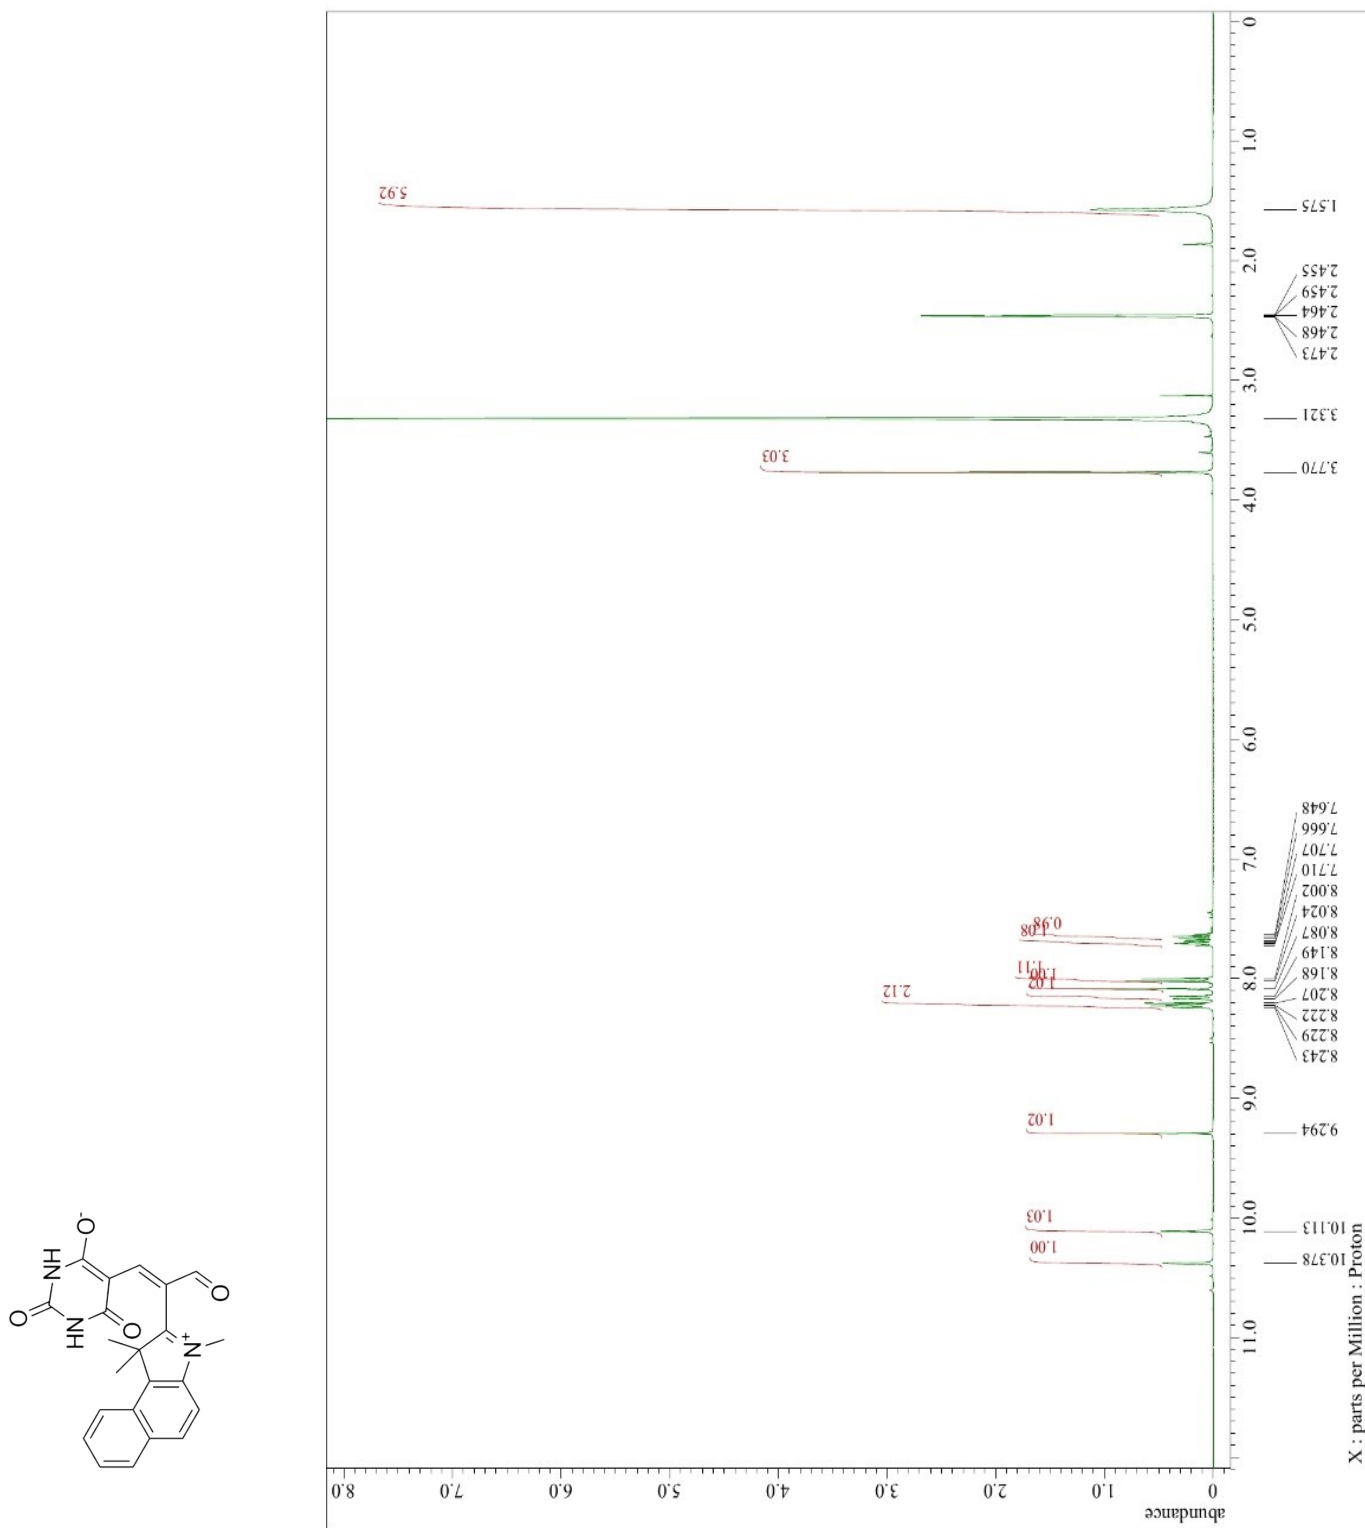

**Fig. S31:** <sup>1</sup>H NMR (400 MHz, DMSO) spectrum of **21**.

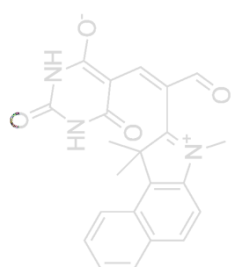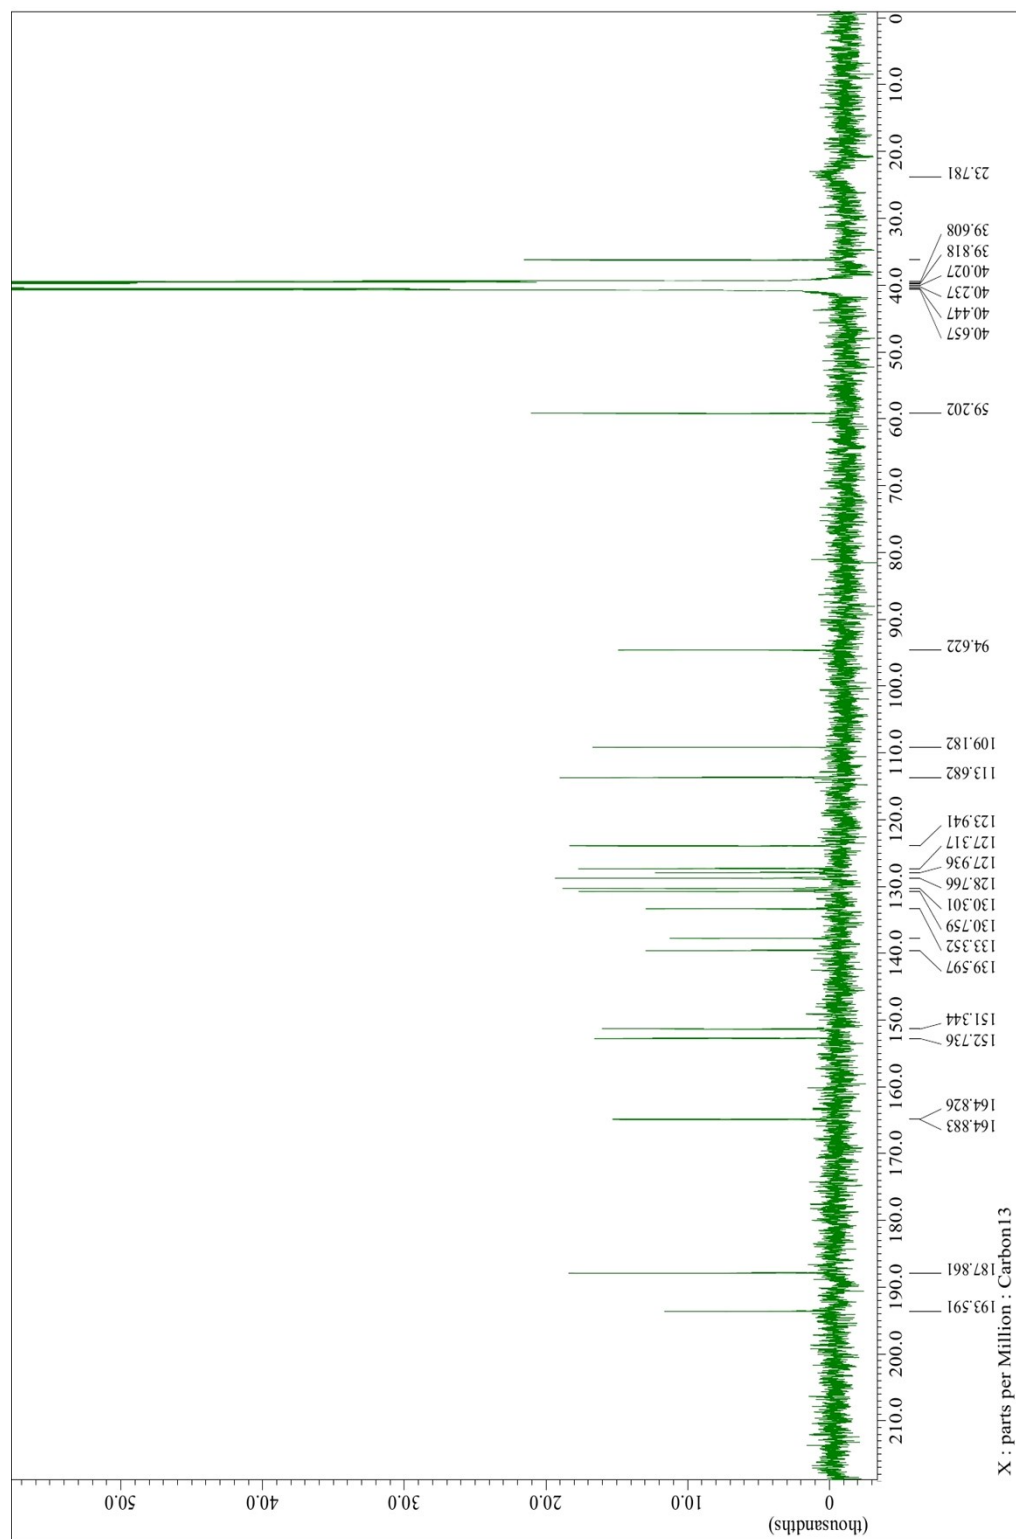

**Fig. S32:**  $^{13}\text{C}$  NMR (100 MHz, DMSO) spectrum of **21**.

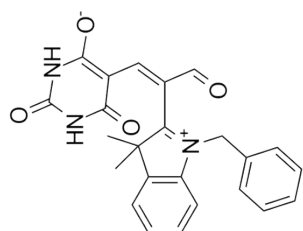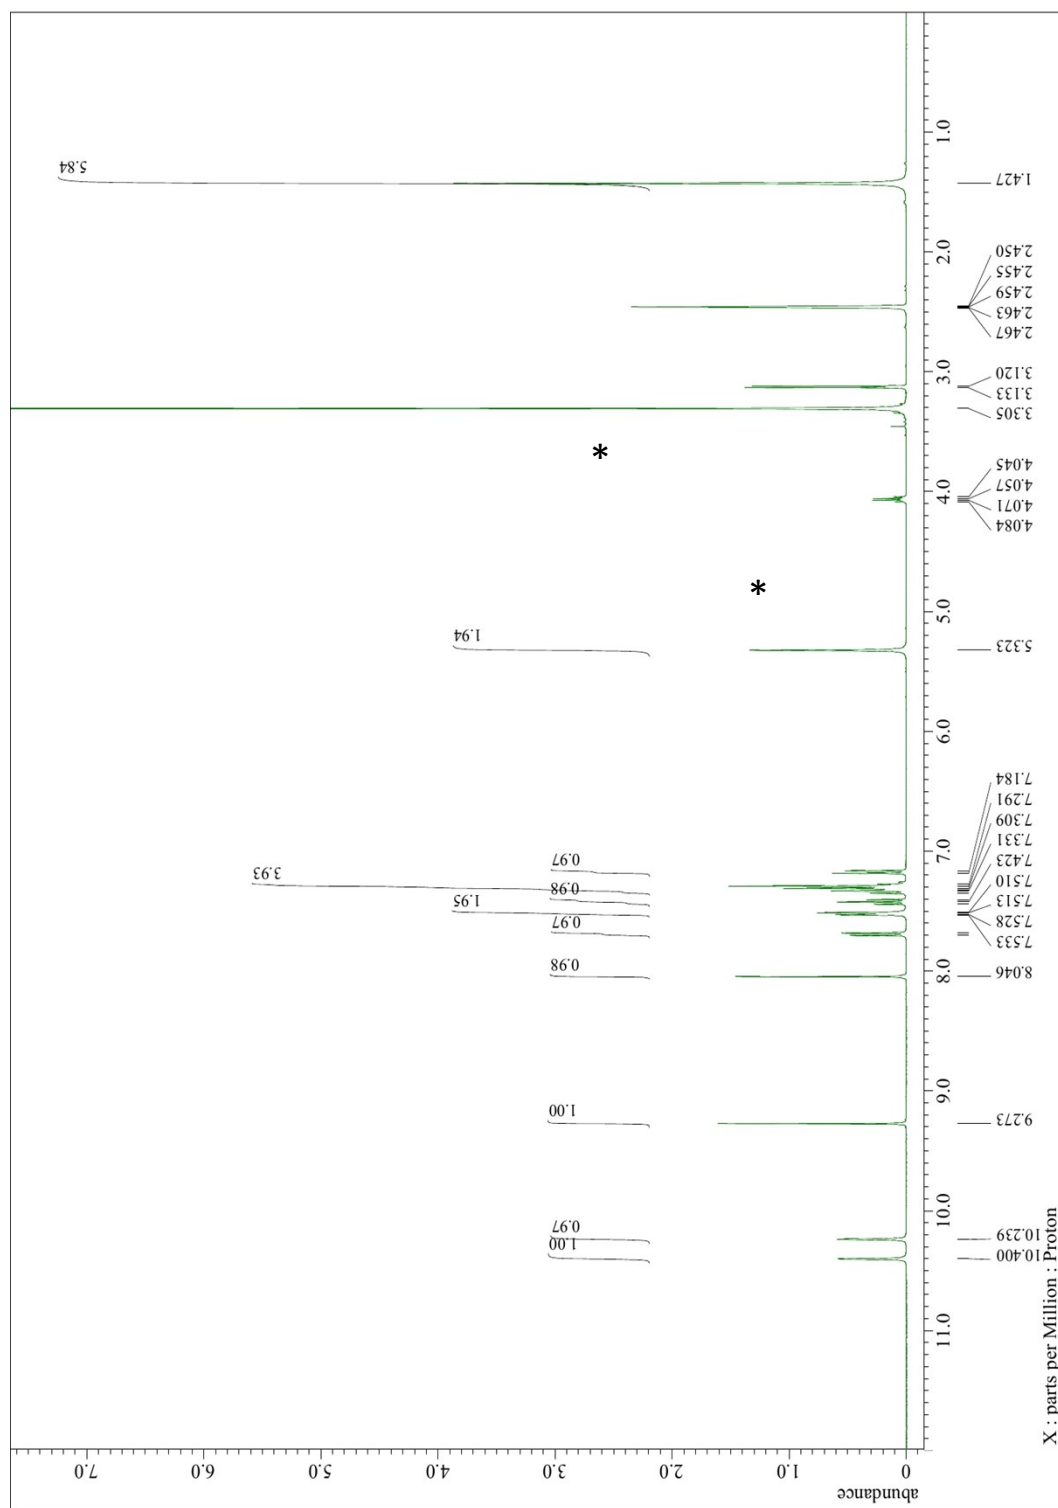

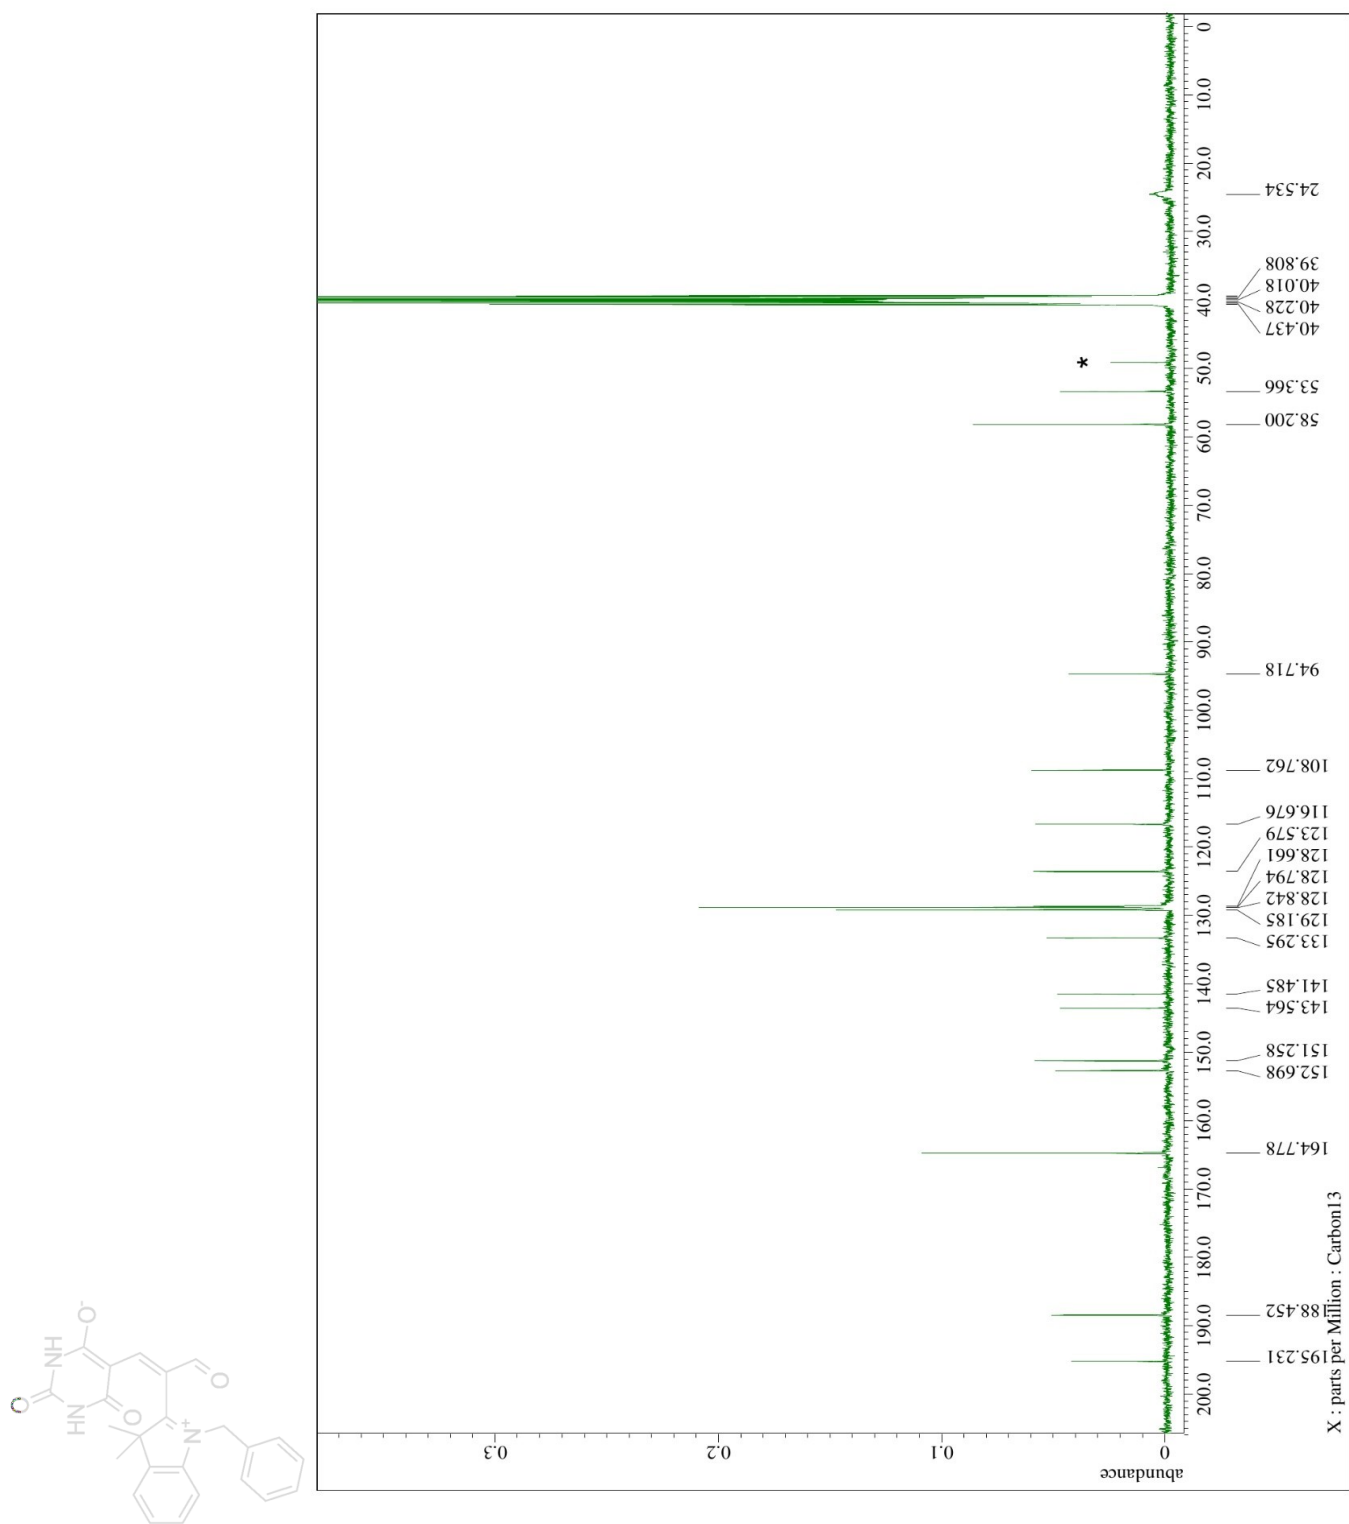

**Fig. S34:**  $^{13}\text{C}$  NMR (100 MHz, DMSO) spectrum of **22**.  
\* represents MeOH peak.

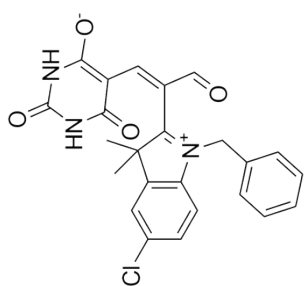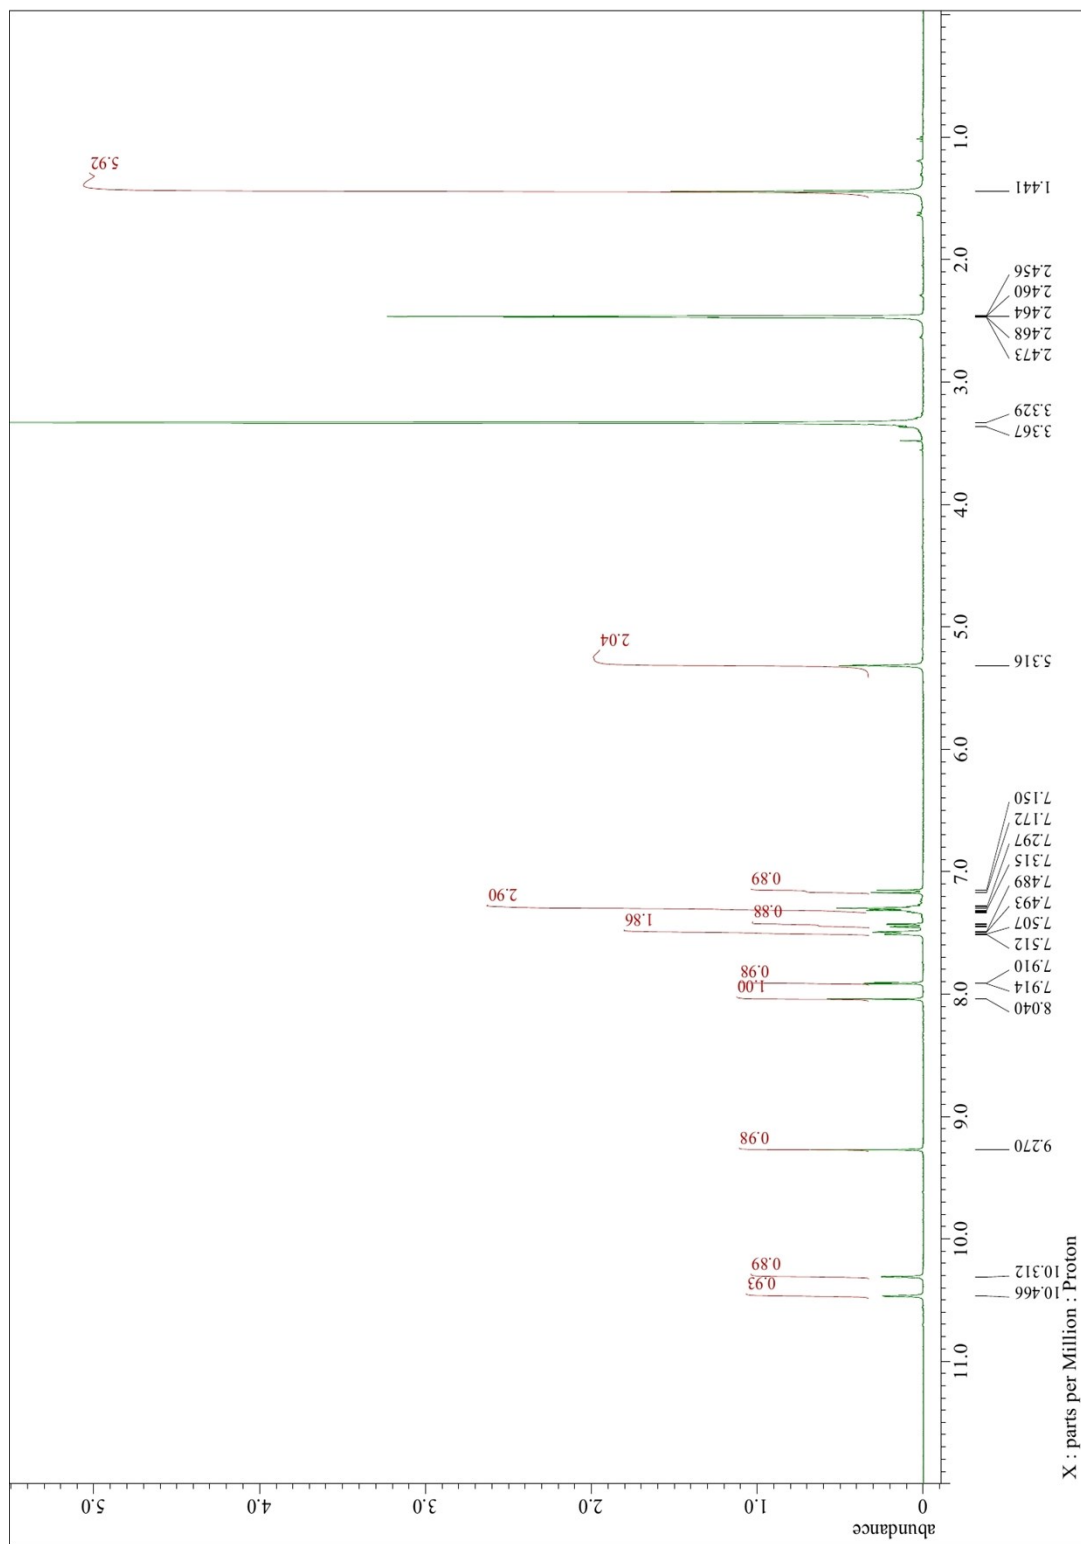

**Fig. S35:**  $^1\text{H}$  NMR (400 MHz, DMSO) spectrum of **23**.

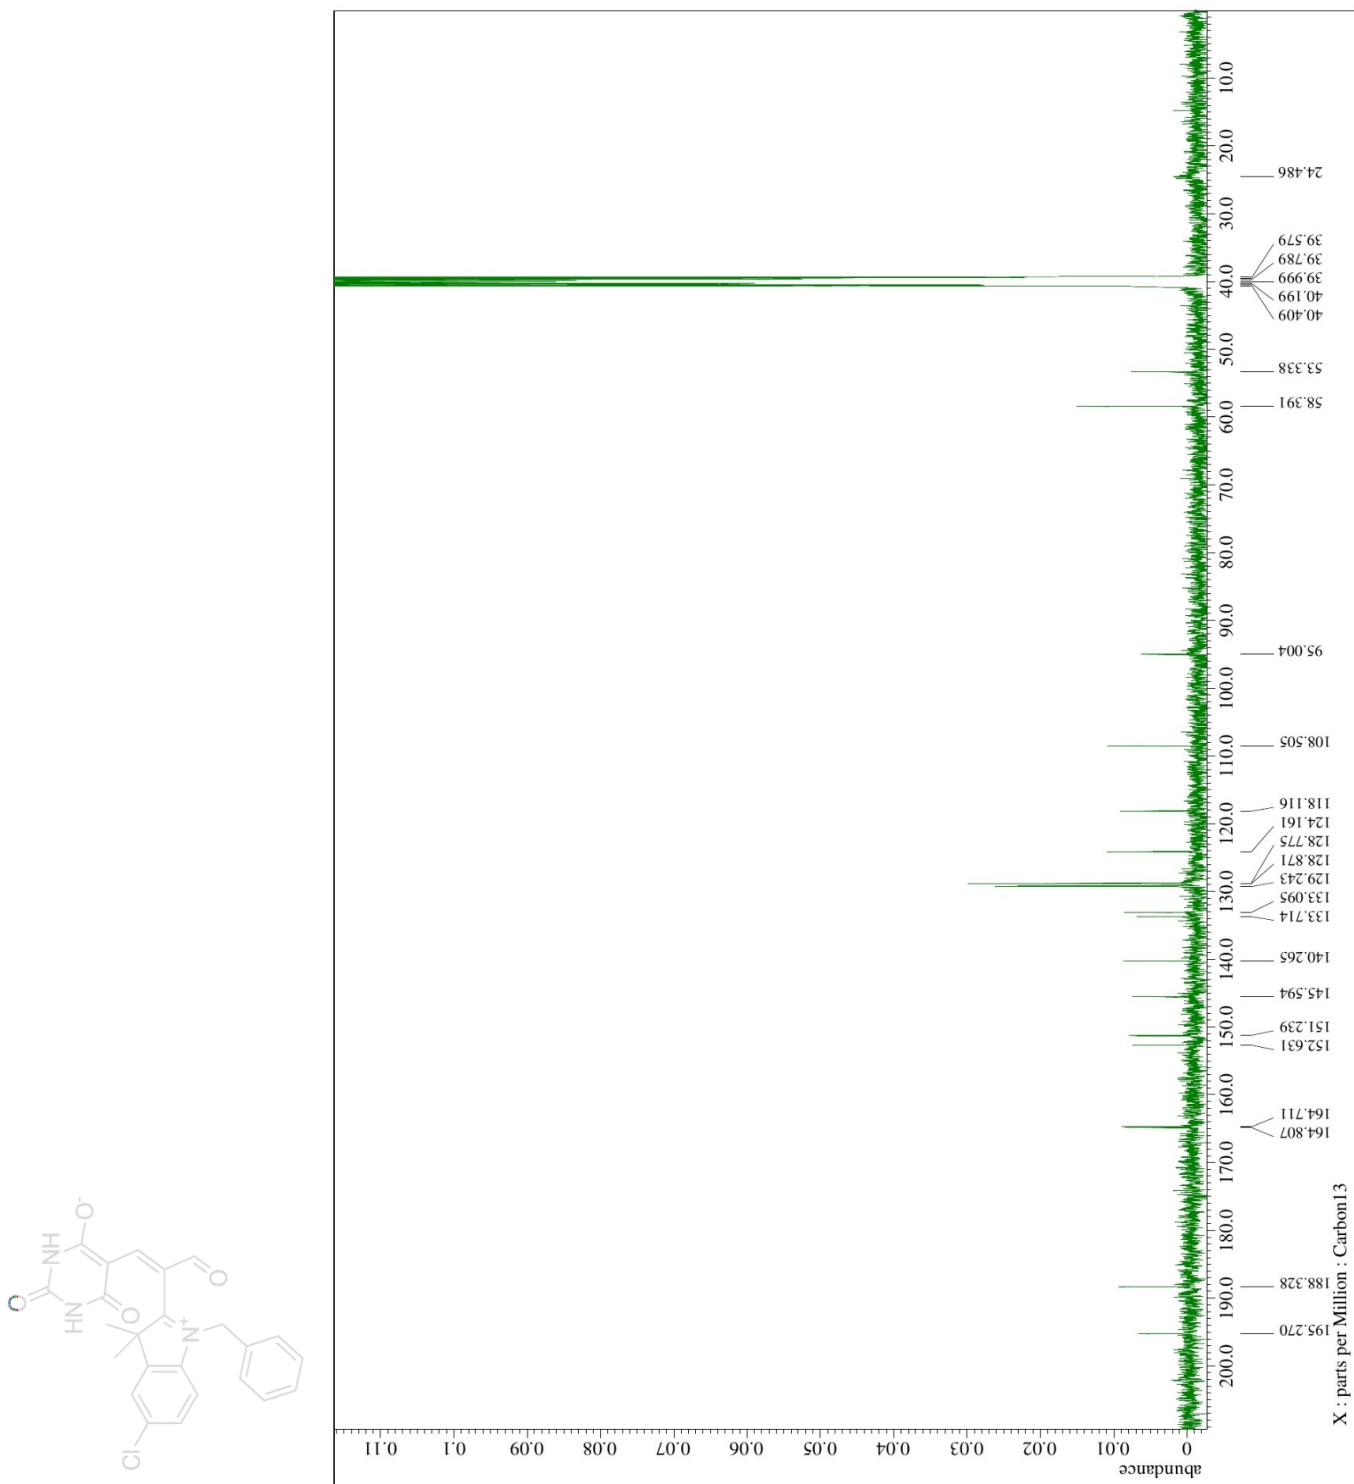

**Fig. S36:**  $^{13}\text{C}$  NMR (100 MHz, DMSO) spectrum of **23**.

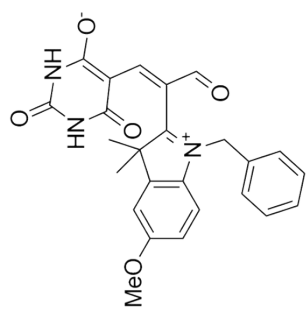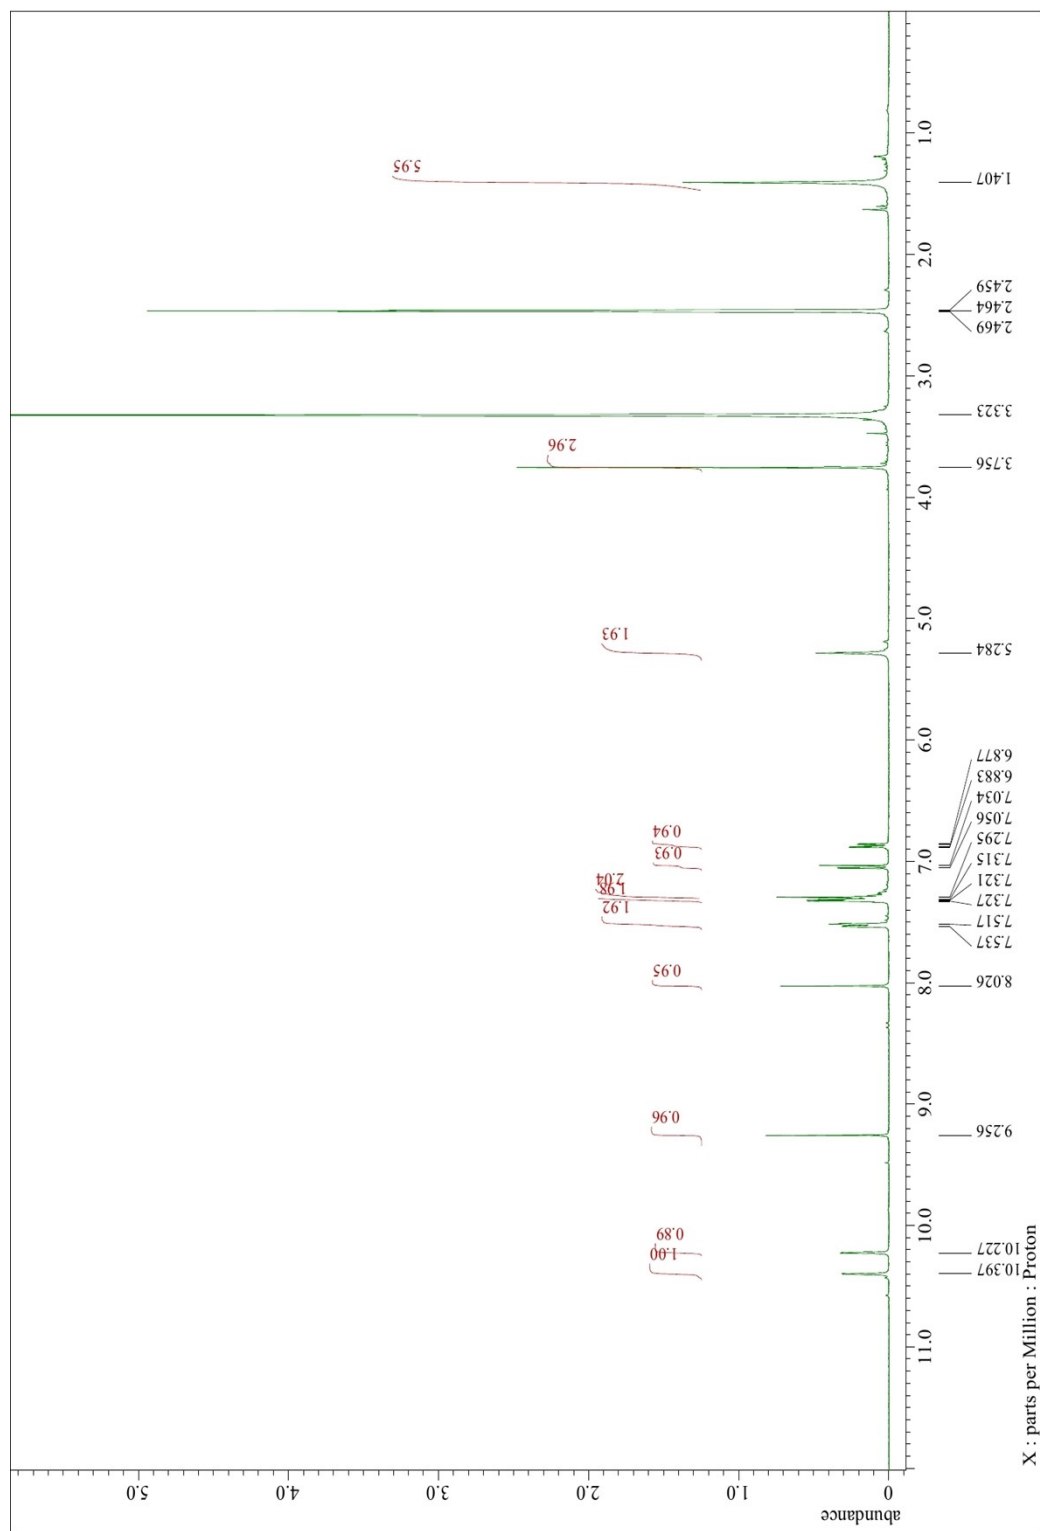

**Fig. S37:**  $^1\text{H}$  NMR (400 MHz, DMSO) spectrum of **24**.



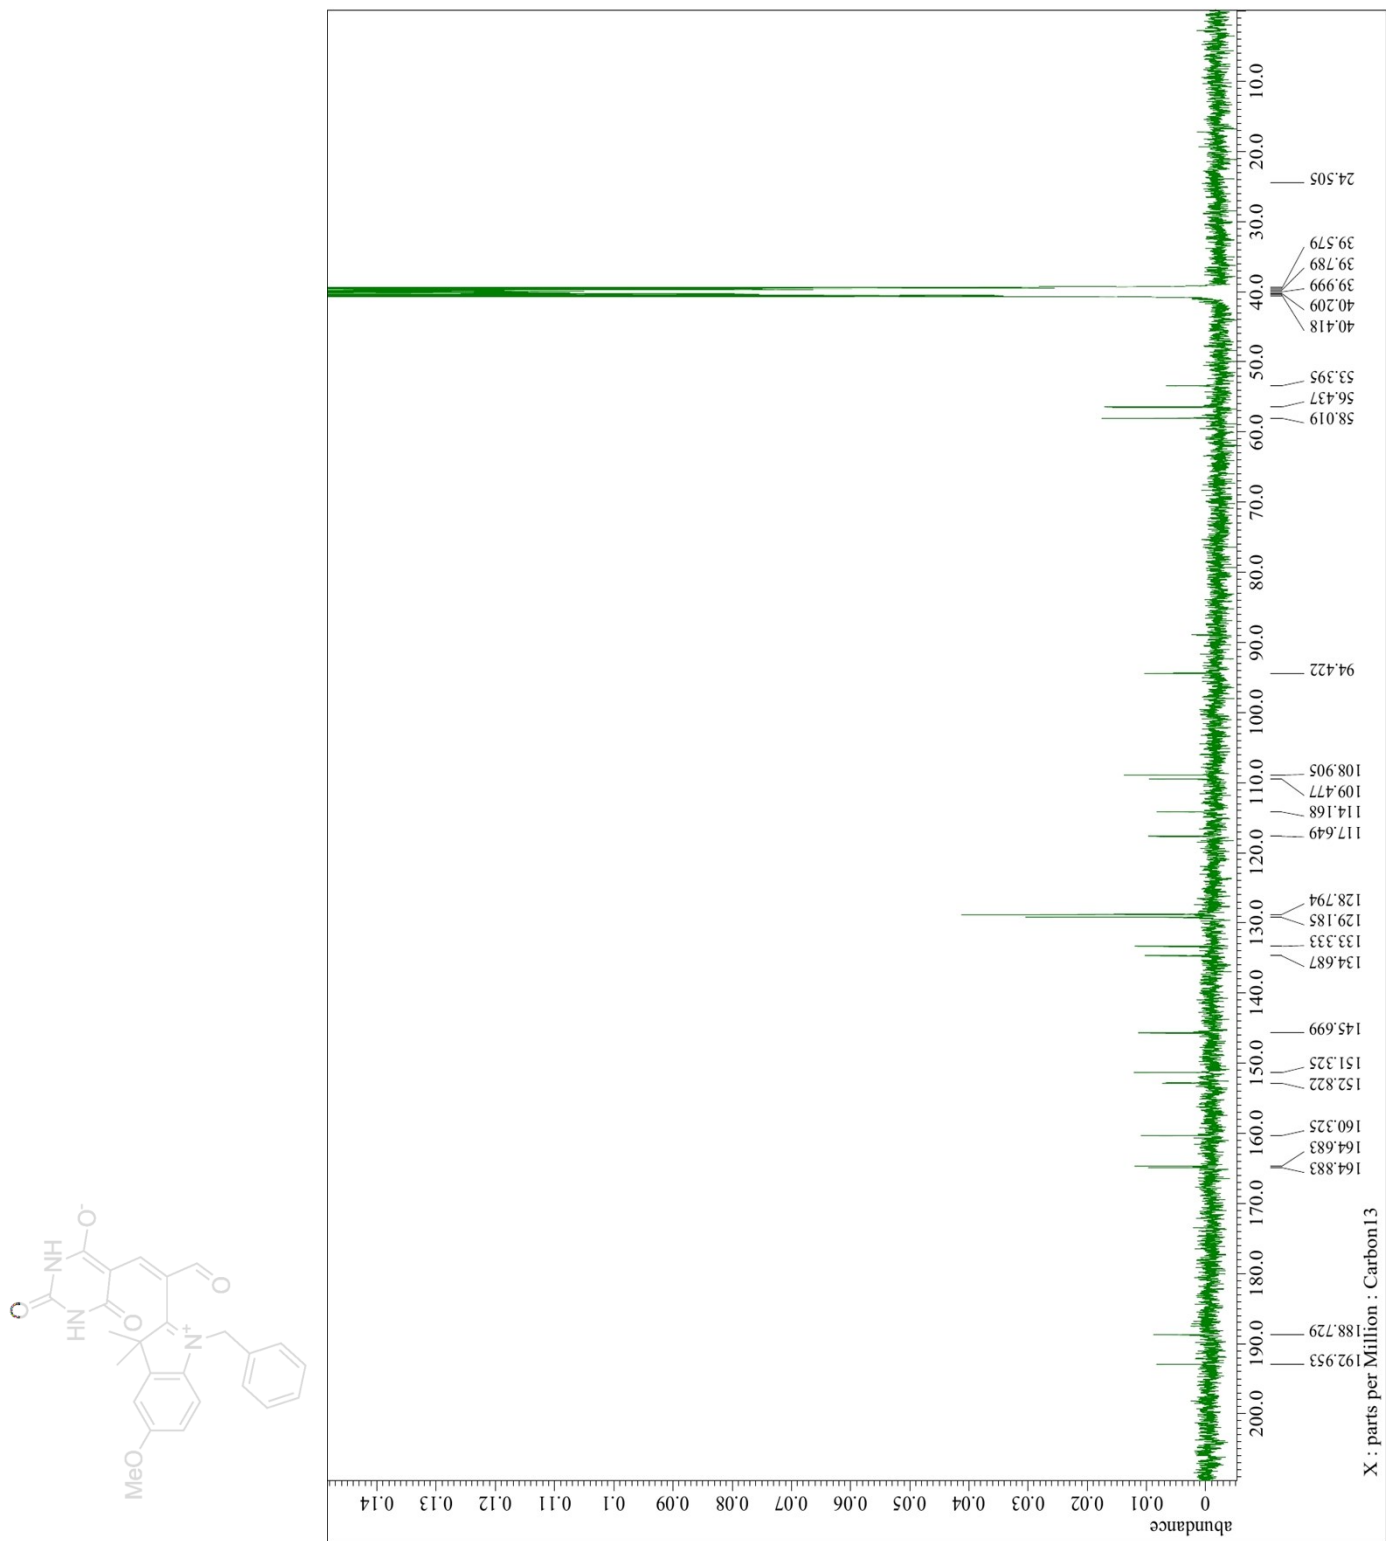

**Fig. S38:** <sup>13</sup>C NMR (100 MHz, DMSO) spectrum of **24**.

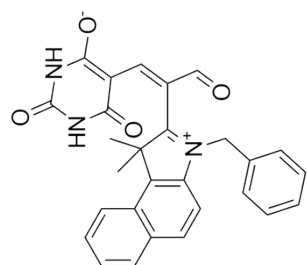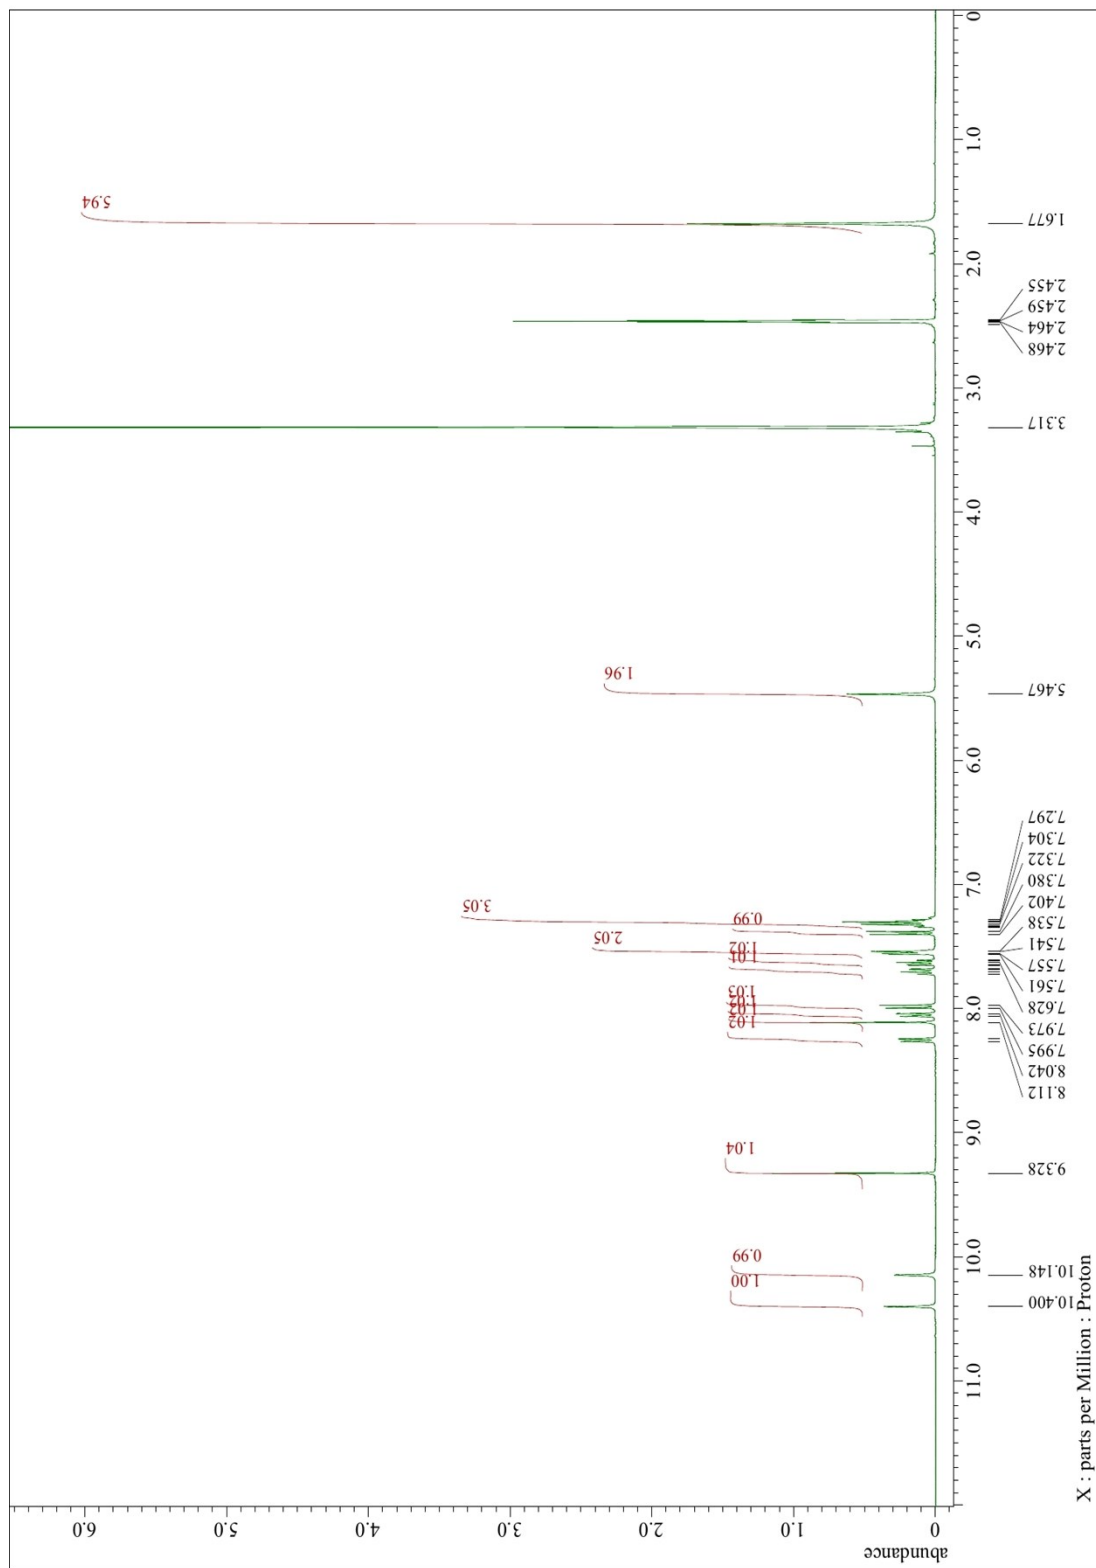

**Fig. S39:**  $^1\text{H}$  NMR (400 MHz, DMSO) spectrum of **25**.

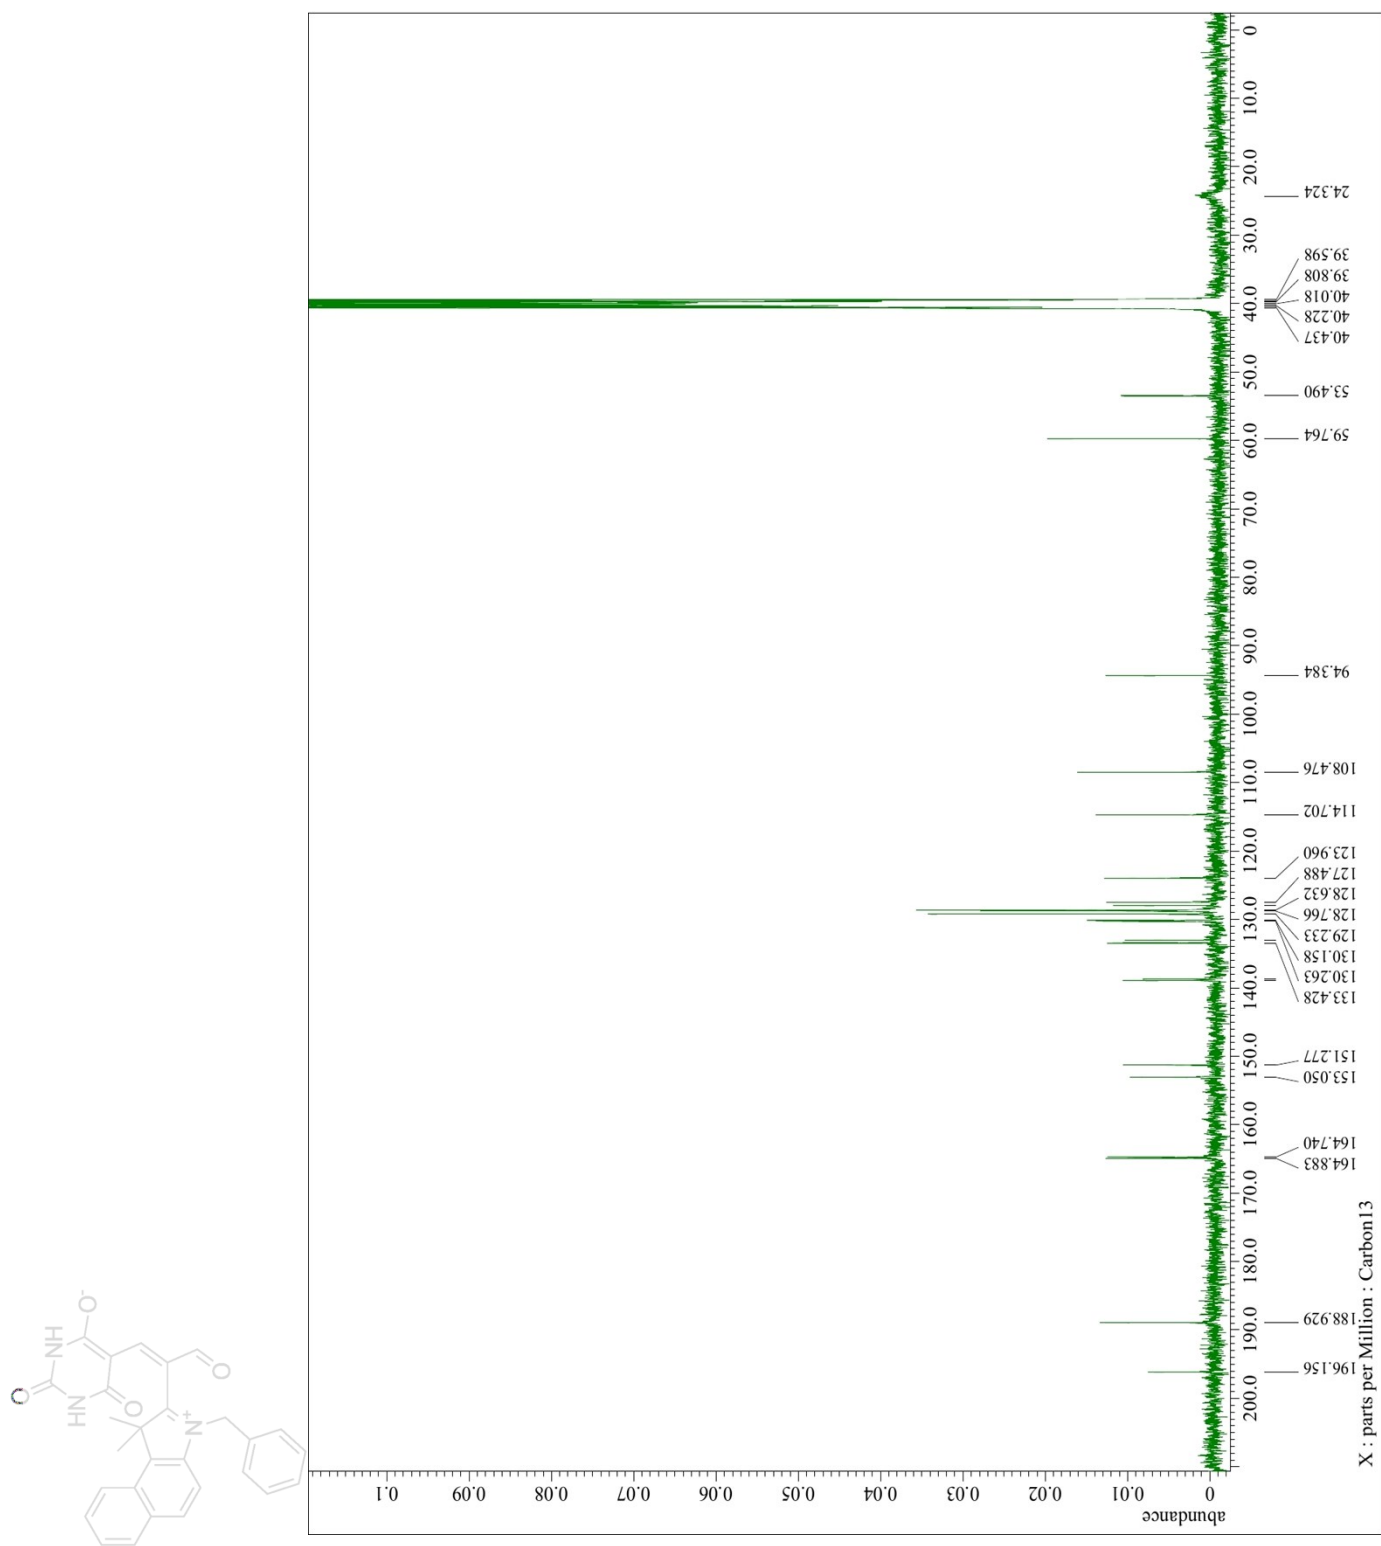

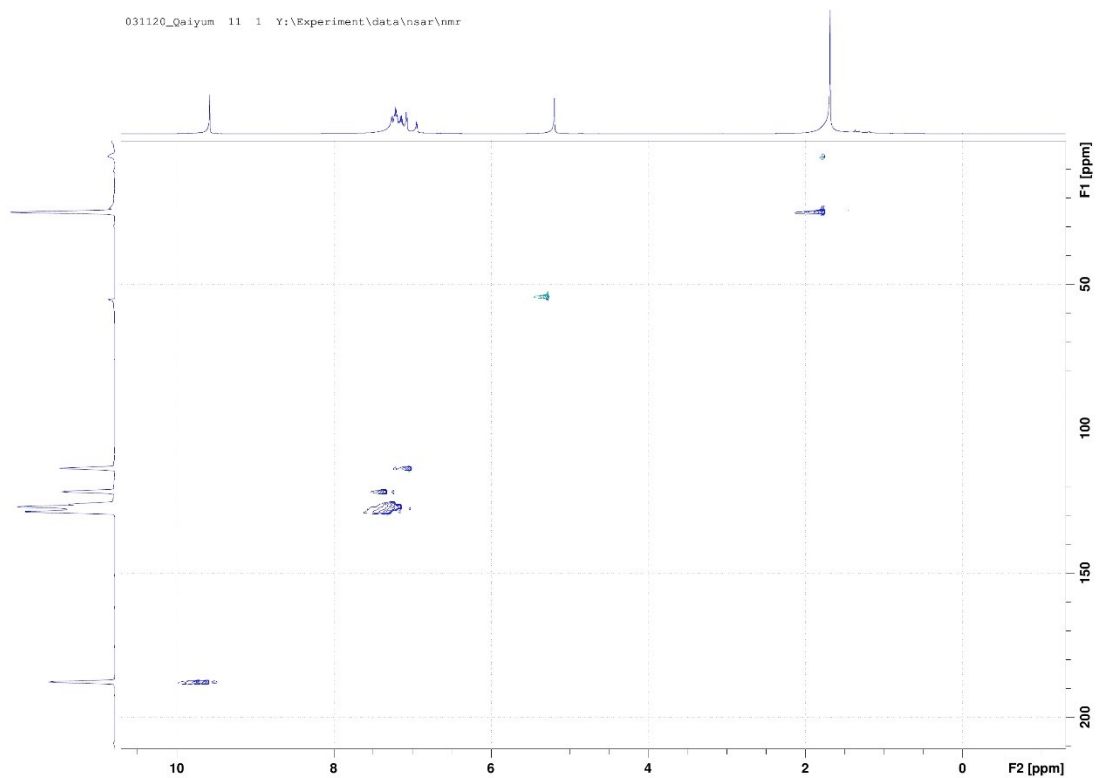

**Fig. S41:** HSQC spectrum of **12**.

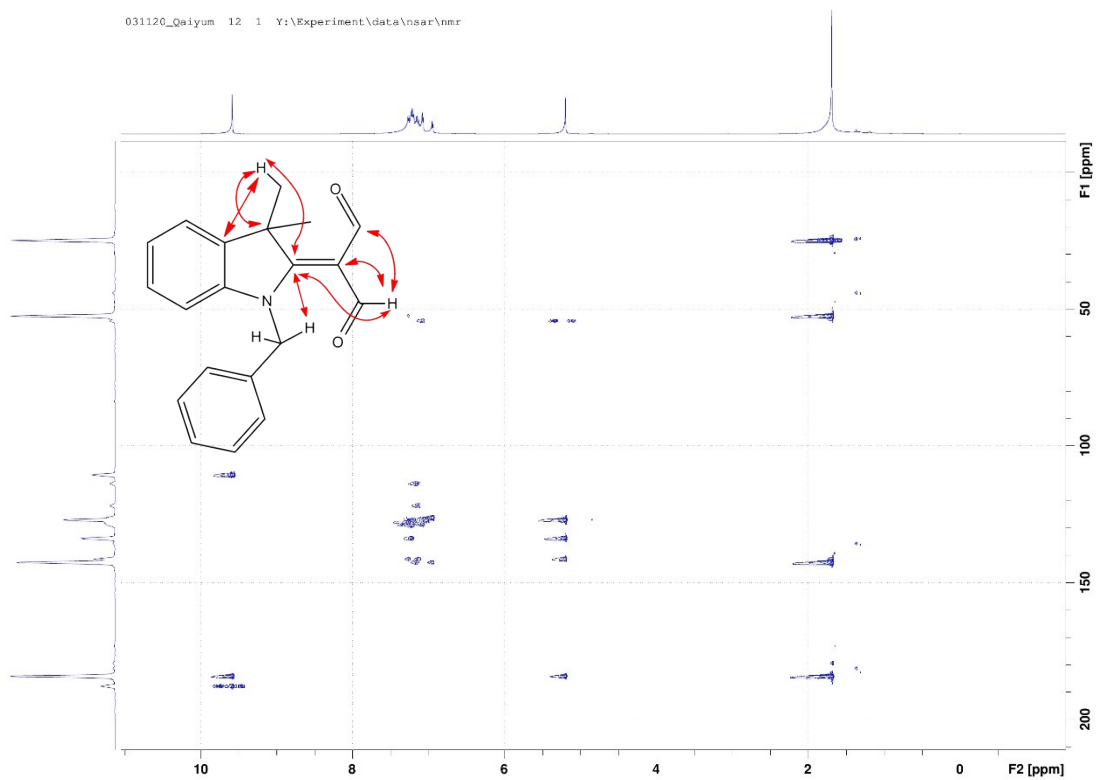

**Fig. S42:** HMBC spectrum of **12**. The inset image is the crucial HMBC interactions.

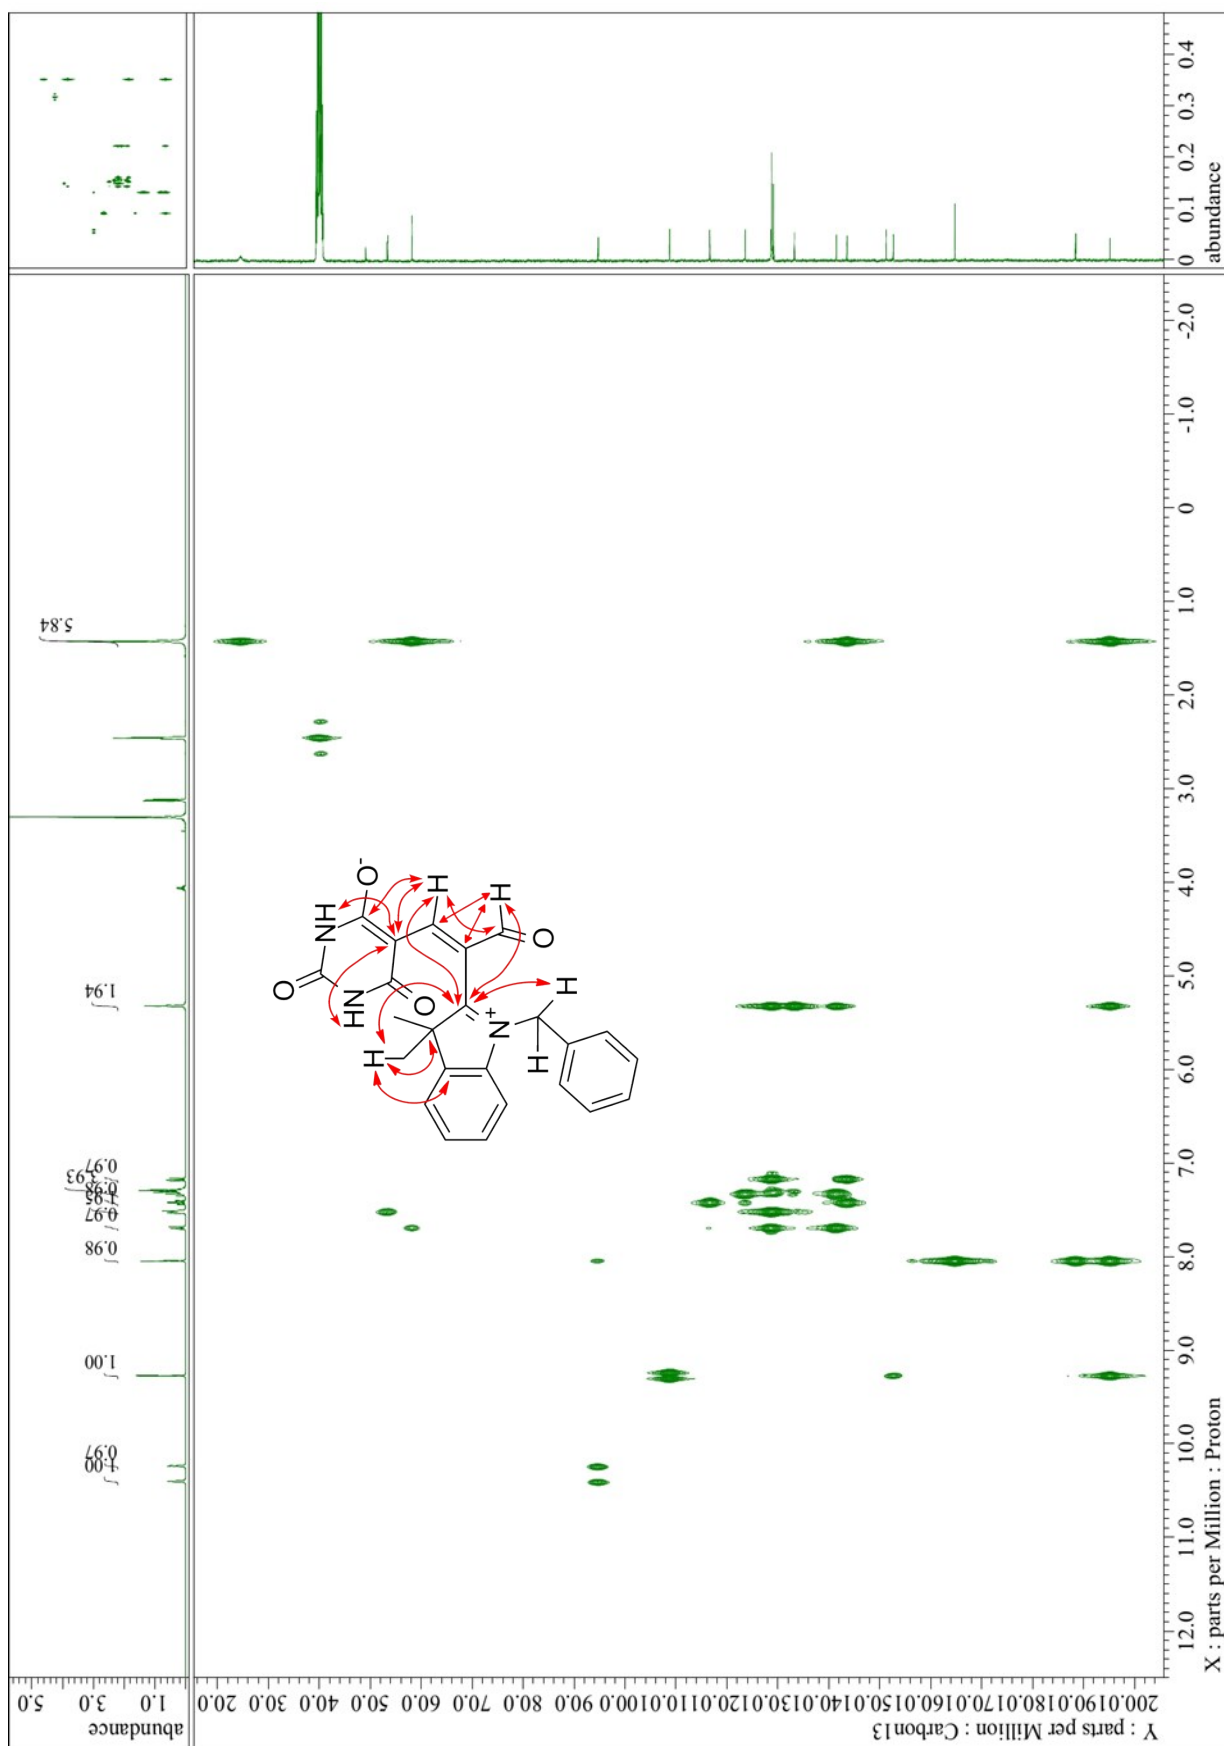

**Fig. S43:** HMBC spectrum of **22**. The inset image is the crucial HMBC interactions.

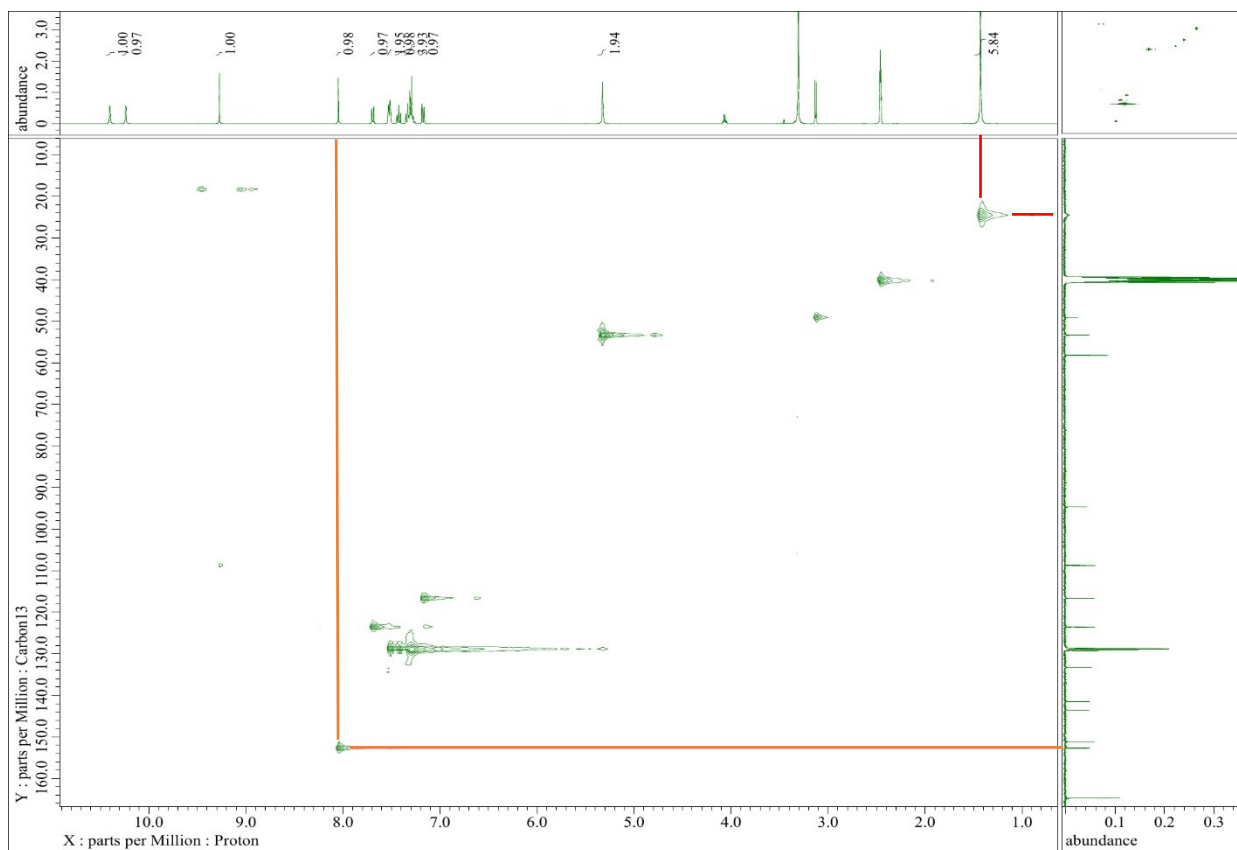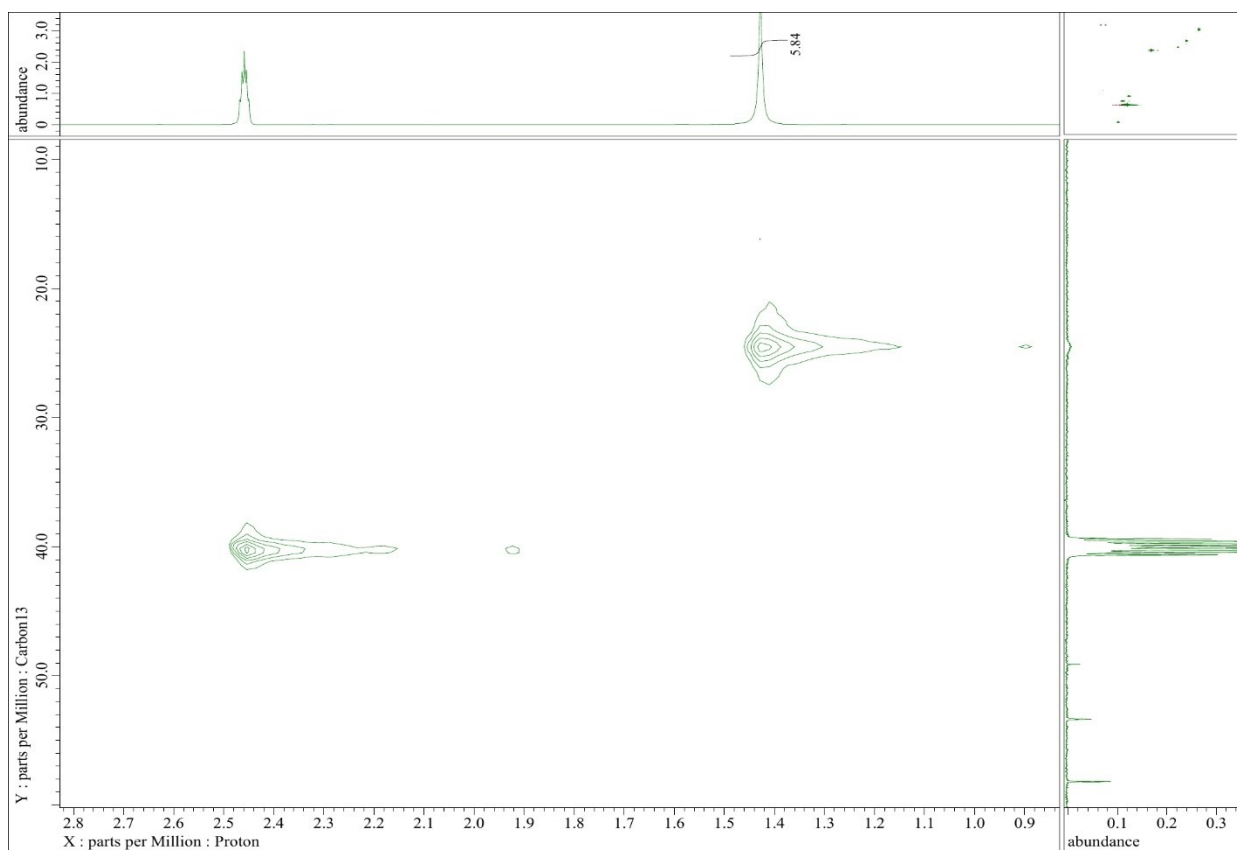

**Fig. S44:** HSQC spectrum of **22**.

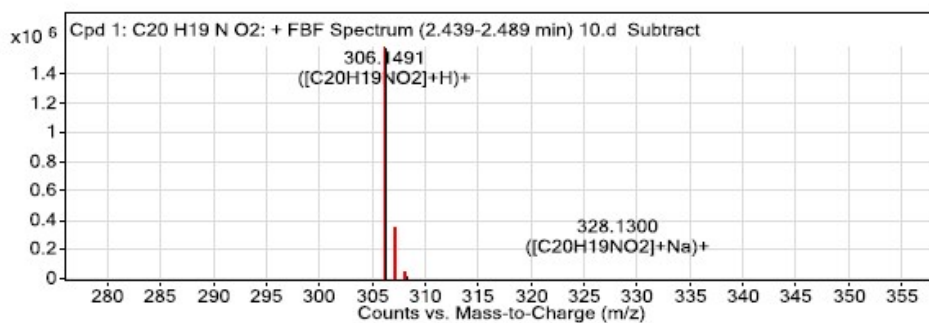

Fig. S45: HRMS spectrum of 12.

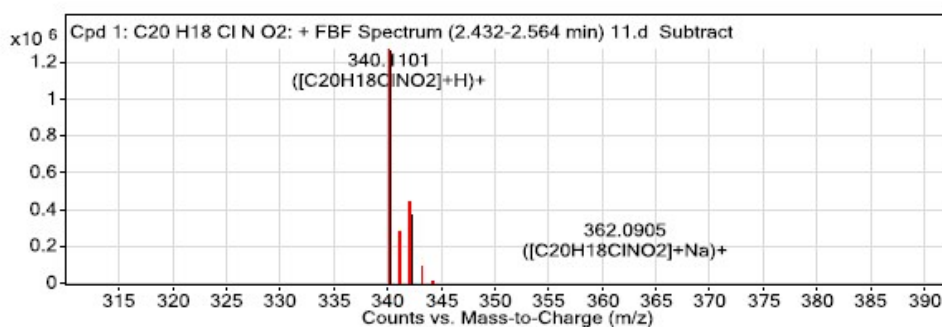

Fig. S46: HRMS spectrum of 13.

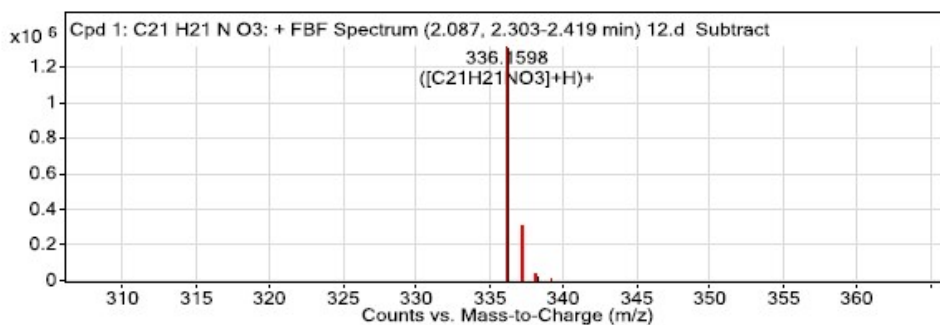

Fig. S47: HRMS spectrum of 14.

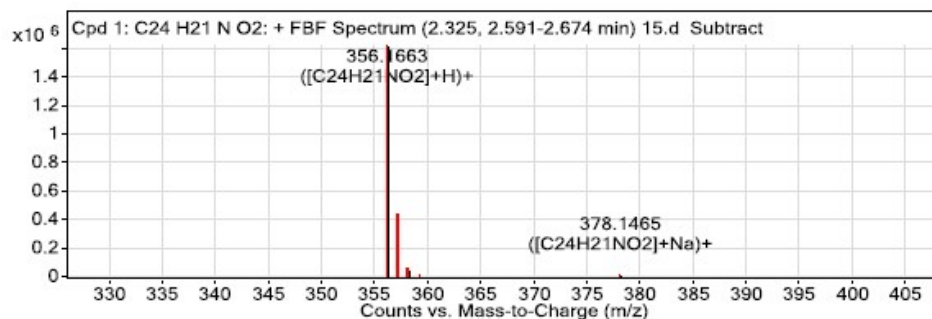

Fig. S48: HRMS spectrum of 15.

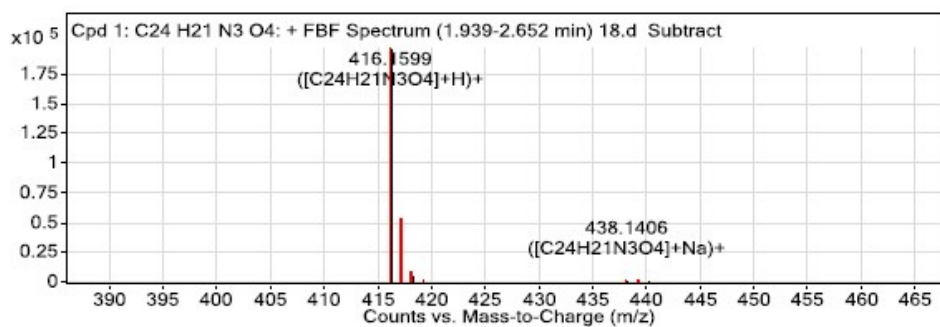

**Fig. S49:** HRMS spectrum of **22**.

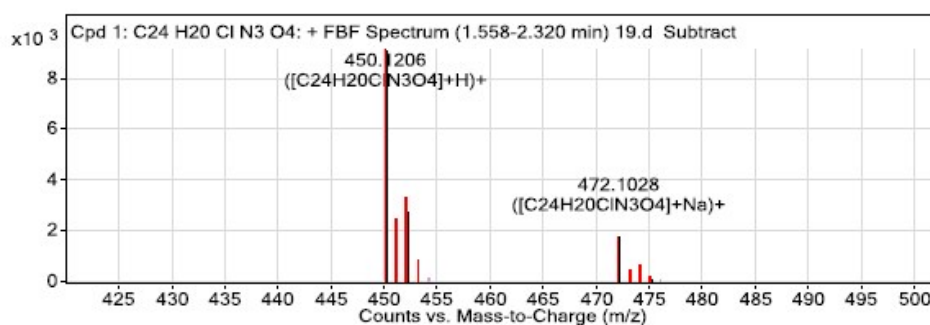

**Fig. S50:** HRMS spectrum of **23**.

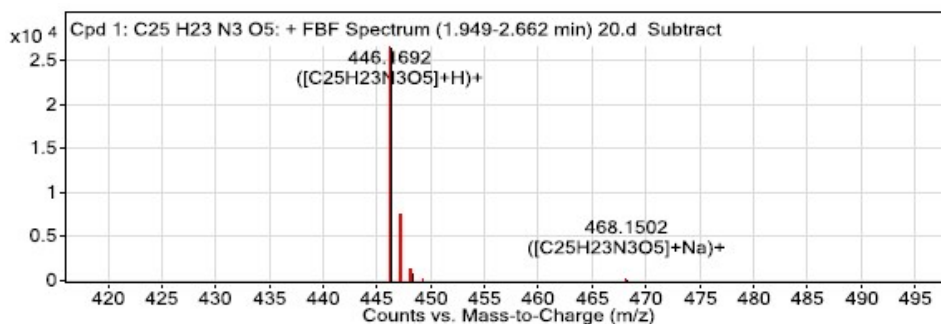

**Fig. S51:** HRMS spectrum of **24**.

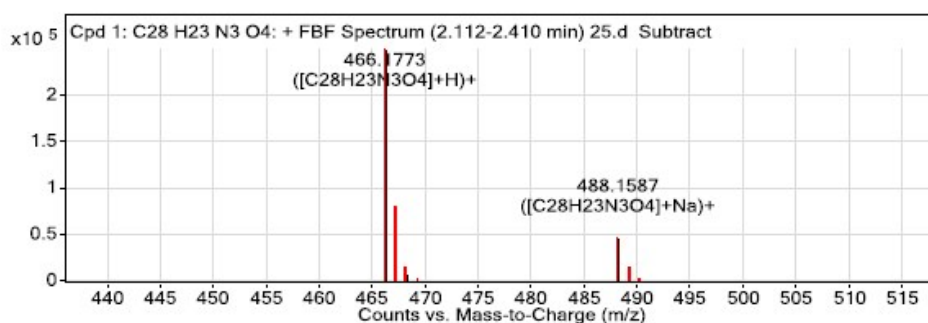

**Fig. S52:** HRMS spectrum of **25**.



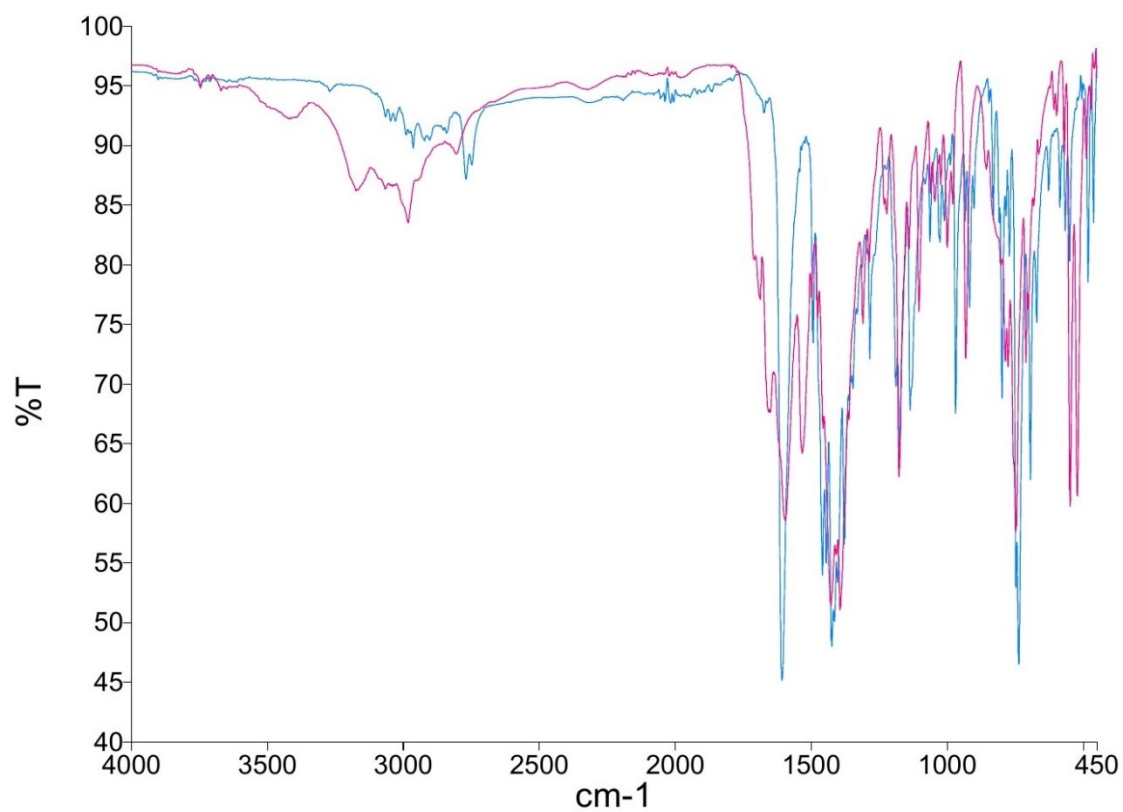

**Fig. S53:** FT-IR spectra of **12** (blue line) and **22** (purple line).

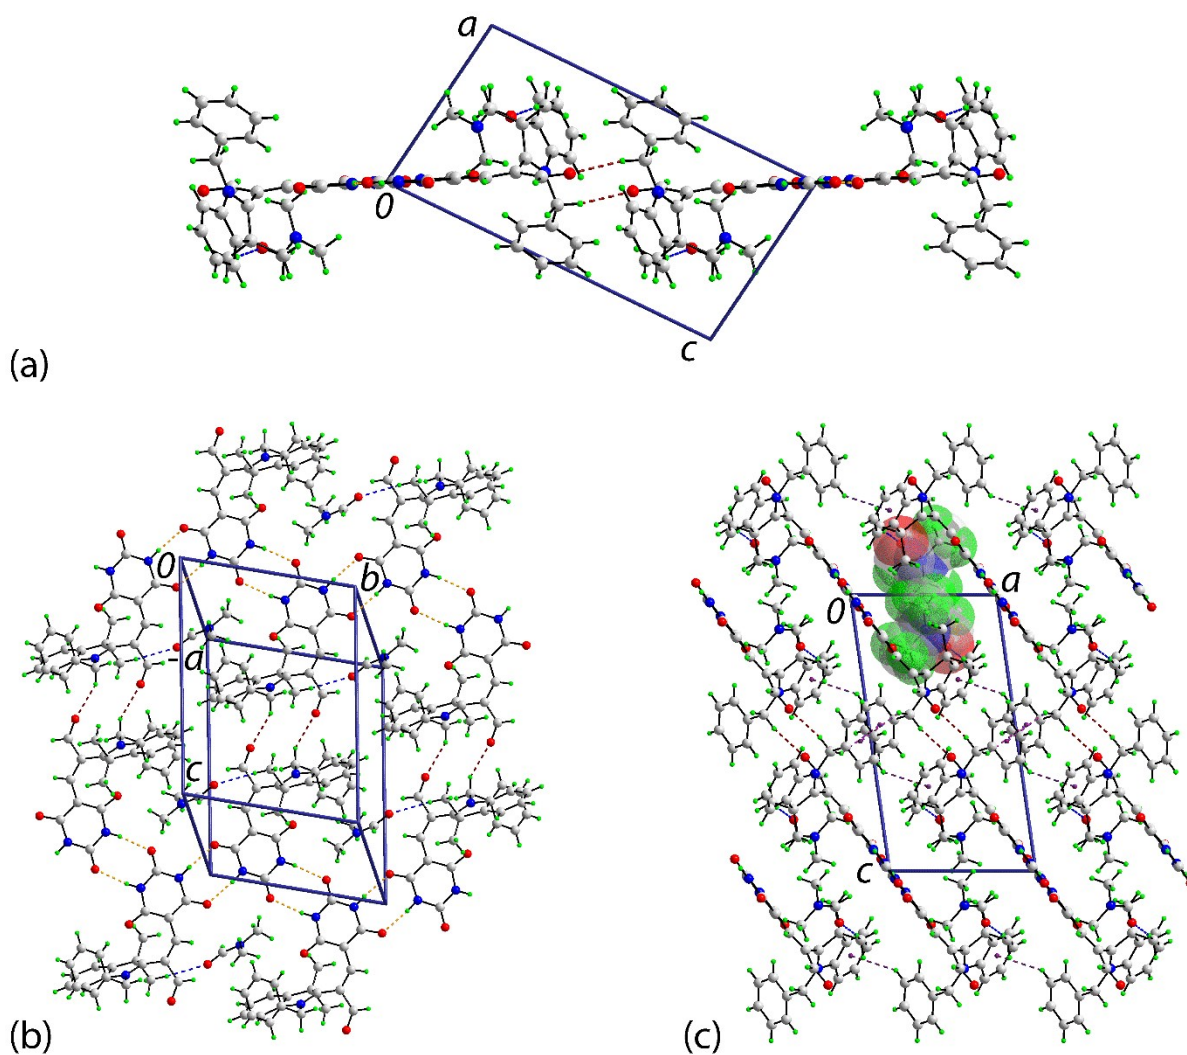

**Fig. S54:** Molecular packing in the crystal of **22.DMF**: (a) a side-on view of the supramolecular layer, (b) plan view of the supramolecular layer and (c) a view of the unit-cell contents in projection down the *b*-axis with one channel occupied by DMF molecules highlighted in space-filling mode. The methyl-C–H...O(DMF) and methylene-C–H...O(BA) interactions are shown as blue and brown dashed lines, respectively, and the C–H... $\pi$ (ar).

**Table S1:** Geometric parameters characterizing the intermolecular points of contact in the crystal of **22.DMF**.

| D–H $\cdots$ A                            | H $\cdots$ A (Å) | D $\cdots$ A (Å) | D – H $\cdots$ A (°) | Symmetry operation |
|-------------------------------------------|------------------|------------------|----------------------|--------------------|
| N2–H2n $\cdots$ O3 <sup>i</sup>           | 2.051(14)        | 2.8965(17)       | 171.7(16)            | 2-x, 1-y, 2-z      |
| N3–H3n $\cdots$ O4 <sup>ii</sup>          | 1.984(15)        | 2.8514(17)       | 172.6(16)            | 2-x, -y, 2-z       |
| C9–H9a $\cdots$ O1 <sup>iii</sup>         | 2.43             | 3.295(2)         | 148                  | 1-x, 1-y, 1-z      |
| C17–H17b $\cdots$ O5                      | 2.53             | 3.483(3)         | 173                  | x, y, z            |
| C9–H9b $\cdots$ Cg(C3-C8) <sup>iv</sup>   | 2.91             | 3.6762(18)       | 137                  | 2-x, 1-y, 1-z      |
| C14–H14 $\cdots$ Cg(C10-C15) <sup>v</sup> | 2.83             | 3.647(3)         | 148                  | 1+x, y, z          |

**Table S2:** Photophysical parameters of **22**.

| Solvent | Absorption, $\lambda_{\max}$ (nm) /<br>$\epsilon$ ( $\times 10^4$ M $^{-1}$ cm $^{-1}$ ) | $\lambda_{\text{onset}}$ (nm) | FWHM (nm)  | $E_{\text{gap}}$ (eV) =<br>$1240 / \lambda_{\text{onset}}$ |
|---------|------------------------------------------------------------------------------------------|-------------------------------|------------|------------------------------------------------------------|
| AcOH    | 349 (2.72)                                                                               | 457                           | 36.5       | 2.71                                                       |
| Diaxone | 351 (2.80), 435 (0.79)                                                                   | 501                           | 27.2, 59.0 | 2.48                                                       |
| DMSO    | 354 (2.77)                                                                               | 495                           | 27.9       | 2.51                                                       |
| MeOH    | 350 (2.70)                                                                               | 474                           | 31.3       | 2.62                                                       |
| THF     | 351 (2.75), 435 (0.78)                                                                   | 501                           | 27.5, 57.2 | 2.48                                                       |

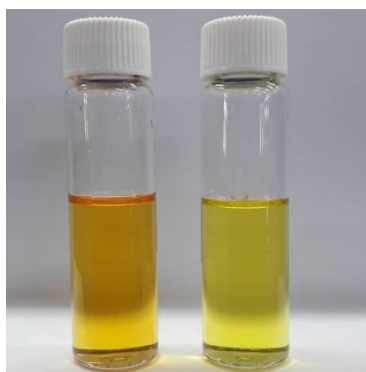

**Fig. S55:** Photograph of zwitterion **19** in dilute DMF solution (left) and after adding 1 equiv. of TFA (right).

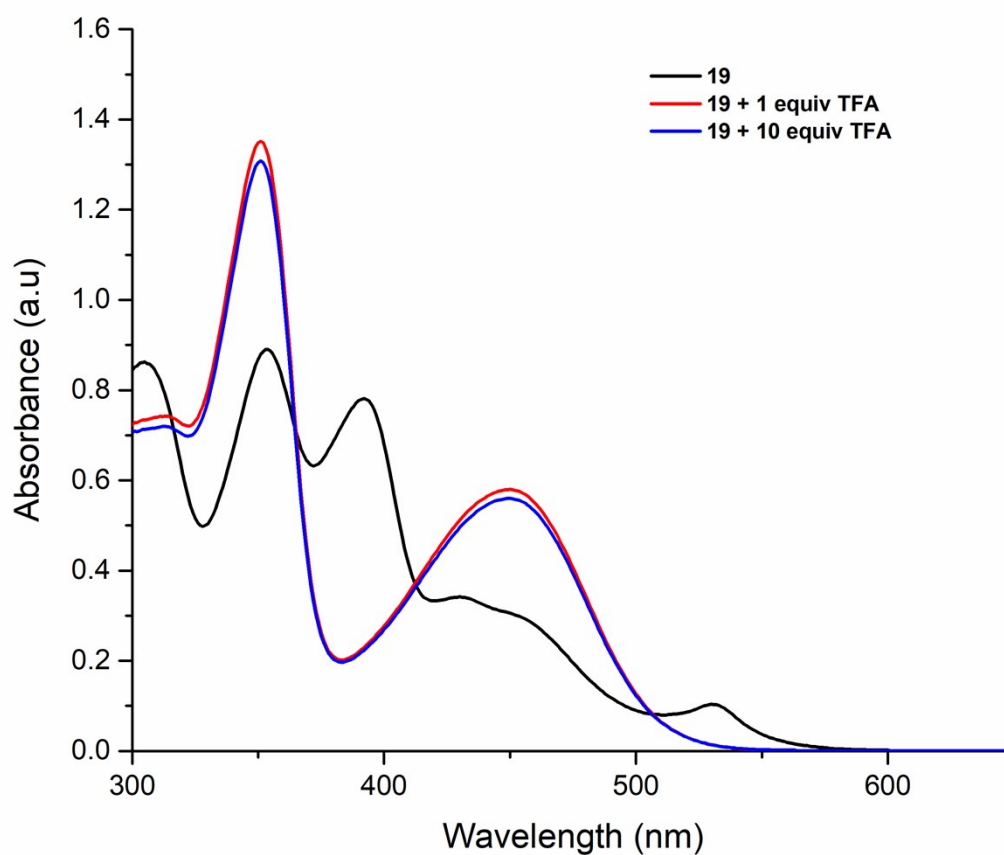

**Fig. S56:** UV-vis absorption spectra of zwitterion **19** in dilute DMF (50  $\mu$ M) with different amounts of TFA.

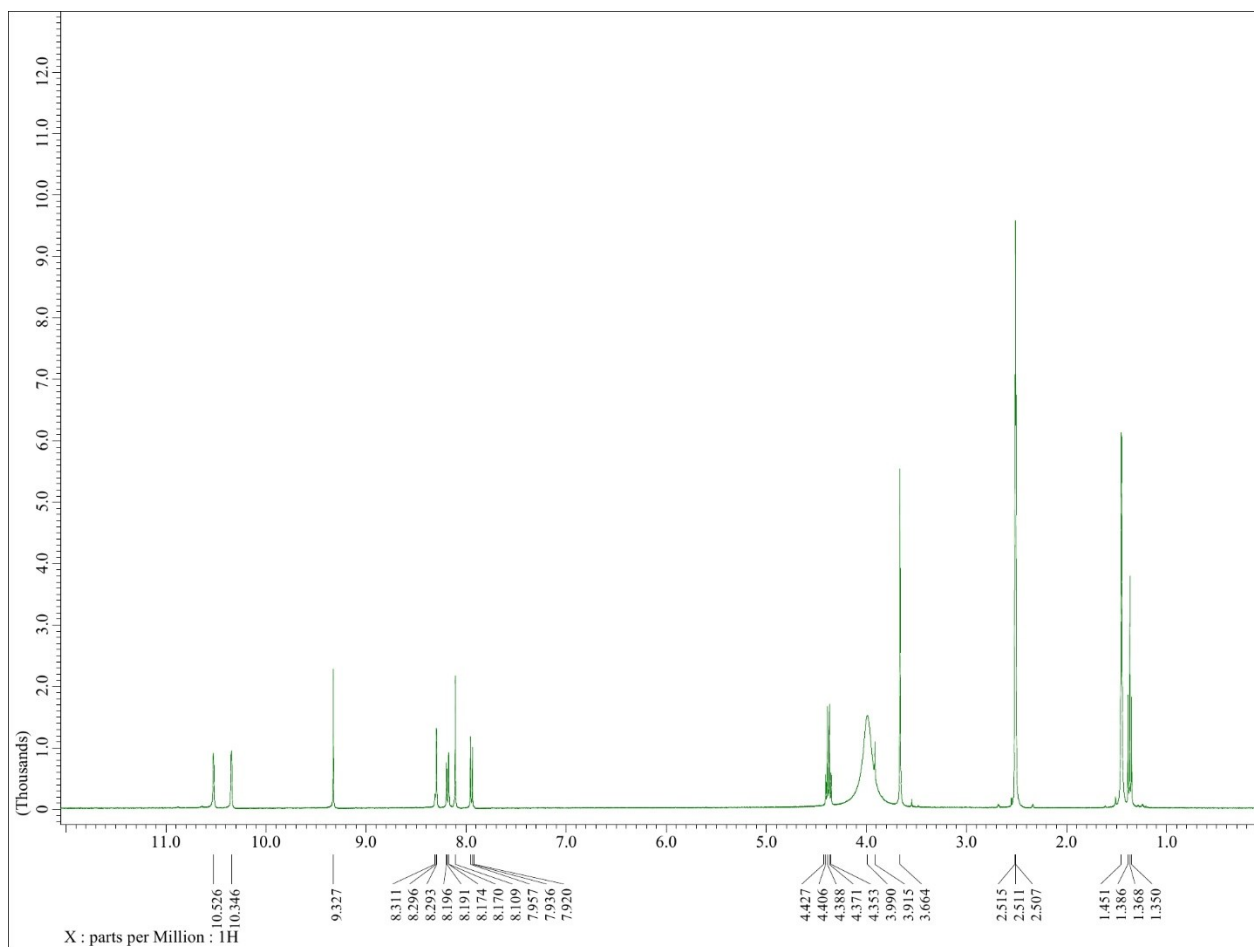

**Fig. S57:**  $^1\text{H}$  NMR spectrum (400 MHz, DMSO) of **19** with 10 equiv. of TFA.
